# Supplementary material for: Metabolic, Organoleptic and Transcriptomic Impact of <em>Saccharomyces cerevisiae</em> Genes Involved in the Biosynthesis of Linear and Substituted Esters
Source: Preprints.org preprint supplement (doi:10.20944/preprints202103.0098.v1), 2021-03-02
Supplement: Supplementary file 1 [file supplementary]

## Sheet: String Protein-protein-SIGN
pvalue	log2	gene	pos	chr	name	Function Unknown Now	x
0.000321317	-24.5184	YGR176W	848720	7
9.89534e-06	-22.1904	YLR428C	990617	12
2.13785e-07	-21.6875	YCR087W	263976	3
0.00111438	-21.414	YPL238C	100474	16
0.0029729	-20.1196	YJL086C	272478	10
0.0242978	-19.0235	YKR105C	658716	11	VBA5	Vacuolar Basic Amino acid transporter	x
2.13785e-07	-18.6125	YOR387C	1069621	15
2.13785e-07	-15.5256	YDR316W-B	1096064	4
0.0362221	-5.15359	YJL157C	123836	10	FAR1	Factor ARrest
0.0226807	-5.12631	YML101C-A	69409	13
0.0204751	-4.63358	YHR005C	113499	8	GPA1	G Protein Alpha subunit
0.01864	-4.60359	YGL193C	141916	7
0.001321	-4.57283	YLR031W	204225	12
0.0404413	-4.56311	YDL050C	364446	4
0.0243764	-4.55538	YJL202C	53943	10
0.0183311	-4.41042	YBR299W	805351	2	MAL32	MALtose
0.00418679	-4.07931	YJR086W	586068	10	STE18	STErile
0.039966	-3.98115	YLR008C	165577	12	PAM18	Presequence translocase-Associated Motor
0.00215829	-3.9472	YLR030W	203290	12
0.0391781	-3.71524	YBR083W	409169	2	TEC1	Transposon Enhancement Control
0.0376153	-3.63387	YOL019W-A	288420	15
0.00418679	-3.45176	YJL203W	53341	10	PRP21	Pre-mRNA Processing
0.00356964	-3.44005	YDR491C	1434500	4
0.0386084	-3.40705	YGR169C	834689	7	PUS6	PseudoUridine Synthase
0.0297186	-3.3967	YPR027C	620425	16
0.0321912	-3.38597	YDL119C	246689	4	HEM25	HEMe synthesis by SLC25 family member
0.022437	-3.37444	YBR073W	383112	2	RDH54	RaD54 Homolog
0.00452319	-3.37228	YDL244W	16204	4	THI13	THIamine metabolism	x
0.0192476	-3.36549	YLR236C	611794	12
0.0398397	-3.33131	YCR002C	117380	3	CDC10	Cell Division Cycle
0.0287479	-3.32894	YDR085C	614288	4	AFR1	Alpha-Factor Receptor regulator
0.0448512	-3.30718	YOR212W	742910	15	STE4	STErile
0.0338173	-3.28299	YLR068W	271008	12	FYV7	Function required for Yeast Viability
0.0123016	-3.25405	YER067C-A	292240	5
0.0218194	-3.25072	YLR026C	195450	12	SED5	Suppressor of Erd2 Deletion
0.022437	-3.21119	YDL094C	289572	4
0.0226342	-3.20357	YOL013W-A	301047	15
0.0371362	-3.17836	YBR056W-A	351255	2	MNC1	MaNganese Chelating protein 1
0.022437	-3.17352	YCR050C	213464	3
0.001321	-3.13027	YNL146C-A	351386	14
0.0277368	-3.07264	YPR121W	778583	16	THI22	THIamine metabolism	x
0.00215829	-3.04023	YDL240W	22823	4	LRG1	Lim-RhoGap homolog
0.0367467	-3.02764	YBL061C	105316	2	SKT5
0.0411762	-3.01831	YGR146C	784223	7	ECL1	Extends Chronological Lifespan
0.0399064	-3.01436	YPL130W	304387	16	SPO19	SPOrulation
0.0436923	-2.98778	YLR002C	154343	12	NOC3	NucleOlar Complex associated
0.047062	-2.98597	YFL047W	40421	6	RGD2	RhoGAP domain
0.0226807	-2.97929	YMR158W	572248	13	MRPS8	Mitochondrial Ribosomal Protein, Small subunit
0.0276599	-2.94694	YGR092W	668189	7	DBF2	DumbBell Former
0.0204751	-2.92704	YGL044C	416146	7	RNA15	poly(A) mRNA metabolism
0.0213245	-2.91292	YDR103W	658350	4	STE5	STErile
0.0148721	-2.88553	YBL016W	192451	2	FUS3	cell FUSion
0.031593	-2.86986	YHR044C	194068	8	DOG1	DeOxyGlucose
0.01864	-2.8592	YCR049C	211871	3
0.01864	-2.8423	YIL028W	302100	9
0.022437	-2.84114	YHR148W	393534	8	IMP3	Interacting with Mpp10p
0.042225	-2.83648	YOR276W	841333	15	CAF20	Cap Associated Factor
0.0272665	-2.83325	YOR201C	720470	15	MRM1	Mitochondrial rRNA Methyltransferase
0.0236026	-2.81287	YPR015C	590283	16
0.0419801	-2.81154	YNL018C	599936	14
0.0489498	-2.80046	YIR021W	397294	9	MRS1	Mitochondrial RNA Splicing
0.0486684	-2.78727	YGL176C	171415	7
0.0302222	-2.773	YNL192W	276502	14	CHS1	CHitin Synthase
0.0330869	-2.7334	YPR168W	878076	16	NUT2	Negative regulation of URS Two
0.01132	-2.72634	YNL166C	322219	14	BNI5	Bud Neck Involved
0.038859	-2.71582	YNL146W	351715	14
0.0292085	-2.70502	YOR315W	904760	15	SFG1	SuperFicial pseudohyphal Growth
0.0267986	-2.70299	YIR023C-A	402383	9
0.0299629	-2.69235	YER168C	521029	5	CCA1	tRNA CCA-pyrophosphorylase
0.022437	-2.69224	YOR203W	722565	15
0.0414672	-2.6909	YDL213C	77289	4	NOP6	NucleOlar Protein
0.0324779	-2.6841	YGR229C	949382	7	SMI1	Suppressor of MAR Inhibitor
0.0447706	-2.68282	YLR390W	903066	12	ECM19	ExtraCellular Mutant
0.0382283	-2.66522	YHR063C	224030	8	PAN5	PANtothenate biosynthesis
0.0312572	-2.66466	YOR324C	923232	15	FRT1	Functionally Related to TCP1
0.0370096	-2.6597	YIL016W	321454	9	SNL1	Suppressor of Nup116-C Lethal
0.0288829	-2.61037	YDR524C-B	1489598	4
0.0161154	-2.60078	YMR232W	736926	13	FUS2	cell FUSion
0.0434625	-2.59085	YMR032W	335298	13	HOF1	Homolog Of cdc Fifteen
0.0436025	-2.58241	YOR344C	977194	15	TYE7	Ty1-mediated Expression
0.0378716	-2.57746	YBR161W	561634	2	CSH1	CSG1/SUR1 Homolog
0.0226807	-2.57093	YDL189W	122216	4	RBS1	RNA-Binding Suppressor of PAS kinase
0.01864	-2.56563	YGR044C	582990	7	RME1	Regulator of MEiosis
0.047062	-2.55229	YNL036W	559814	14	NCE103	NonClassical Export
0.0442295	-2.54941	YBR178W	586071	2
0.0433892	-2.542	YLR133W	408445	12	CKI1	Choline KInase
0.0440213	-2.5377	YNR054C	723356	14	ESF2	Eighteen S rRNA Factor 2
0.0498138	-2.52936	YGR249W	988049	7	MGA1
0.0382972	-2.52878	YPR125W	787961	16	YLH47	Yeast LETM1 Homolog of 47 kD
0.0302222	-2.52771	YPL215W	147416	16	CBP3	Cytochrome B mRNA Processing
0.0493228	-2.52087	YPL187W	193648	16	MF(ALPHA)1	Mating Factor ALPHA
0.022437	-2.50673	YOR249C	798674	15	APC5	Anaphase Promoting Complex
0.042225	-2.49413	YLR389C	899577	12	STE23	STErile
0.020051	-2.48453	YGL029W	440063	7	CGR1	Coiled-coil Growth-Regulated
0.022437	-2.47612	YLR083C	294091	12	EMP70
0.031593	-2.46042	YLR312W-A	759480	12	MRPL15	Mitochondrial Ribosomal Protein, Large subunit
0.0454077	-2.45581	YDL157C	174232	4
0.018689	-2.44772	YBR227C	673572	2	MCX1	Mitochondrial ClpX
0.027712	-2.4456	YOR225W	761392	15
0.0374876	-2.44533	YPL060W	434523	16	MFM1	Mrs2 Function Modulating factor
0.047062	-2.44003	YDR524W-C	1489403	4
0.0367467	-2.43427	YAL059W	36509	1	ECM1	ExtraCellular Mutant
0.0298699	-2.43406	YOL031C	266264	15	SIL1	Suppressor of the Ire1/Lhs1 double mutant
0.0242635	-2.43267	YOL163W	9597	15
0.0204751	-2.42854	YCR064C	228095	3
0.047062	-2.42722	YPL077C	409368	16
0.0204751	-2.42571	YPL038W-A	480182	16
0.0485989	-2.41974	YDL049C	365068	4	KNH1	Kre9(Nine) Homolog
0.0348114	-2.41832	YOL150C	44473	15
0.0226807	-2.41154	YOR021C	372798	15	SFM1	Spout Family Methyltransferase 1
0.00702051	-2.41062	YJR088C	586495	10	EMC2	ER Membrane protein Complex
0.0447706	-2.40231	YDR237W	936615	4	MRPL7	Mitochondrial Ribosomal Protein, Large subunit
0.0319693	-2.39766	YDR279W	1019368	4	RNH202	RNase H
0.0391574	-2.38974	YJL200C	56444	10	ACO2	ACOnitase
0.022437	-2.38819	YPR010C	577585	16	RPA135	RNA Polymerase A
0.0204751	-2.38211	YOR081C	476939	15	TGL5	TriacylGlycerol Lipase
0.0264622	-2.38197	YOL006C	313078	15	TOP1	TOPoisomerase
0.0241551	-2.3761	YBR261C	734832	2	TAE1	Translation Associated Element
0.020051	-2.37607	YPR122W	782045	16	AXL1	AXiaL budding
0.0297186	-2.36491	YGL175C	173285	7	SAE2	Sporulation in the Absence of spo Eleven
0.0302222	-2.35989	YOL151W	43694	15	GRE2	Genes de Respuesta a Estres (stress responsive genes)
0.022437	-2.34665	YLR103C	343989	12	CDC45	Cell Division Cycle
0.0296022	-2.34184	YNL233W	211922	14	BNI4	Bud Neck Involved
0.022437	-2.34141	YLR147C	434158	12	SMD3
0.0449875	-2.33818	YPR143W	818323	16	RRP15	Ribosomal RNA Processing
0.022437	-2.3363	YKL042W	358475	11	SPC42	Spindle Pole Component
0.0447706	-2.32923	YLR368W	857540	12	MDM30	Mitochondrial Distribution and Morphology
0.0213245	-2.3253	YJR097W	612413	10	JJJ3	J-protein (Type III)
0.0183311	-2.3215	YPL001W	554605	16	HAT1	Histone AcetylTransferase
0.0235237	-2.31754	YNR020C	667410	14	ATP23
0.0421564	-2.31419	YHL007C	95118	8	STE20	STErile
0.0423249	-2.31203	YGL063W	383654	7	PUS2	PseudoUridine Synthase
0.0475783	-2.31067	YNL274C	121118	14	GOR1	GlyOxylate Reductase
0.0256169	-2.30999	YJL197W	63805	10	UBP12	UBiquitin-specific Protease
0.042225	-2.29987	YDR543C	1524634	4
0.0243764	-2.29986	YGL088W	345836	7
0.0385039	-2.29724	YNL225C	222724	14	CNM67	Chaotic Nuclear Migration
0.0243764	-2.29688	YMR184W	628189	13	ADD37	Alpha1-proteinase inhibitor-Degradation Deficient
0.0238823	-2.28981	YHR152W	401434	8	SPO12	SPOrulation
0.001321	-2.28913	YBR292C	784702	2
0.0232921	-2.28491	YGR014W	516943	7	MSB2	Multicopy Suppression of a Budding defect
0.0204751	-2.27353	YDR484W	1422763	4	VPS52	Vacuolar Protein Sorting
0.0286401	-2.27331	YNL261W	155100	14	ORC5	Origin Recognition Complex
0.0344305	-2.26931	YDR379W	1230167	4	RGA2	Rho GTPase Activating Protein
0.0362221	-2.26461	YJL129C	173599	10	TRK1	TRansport of potassium (K)
0.026133	-2.26399	YML038C	202775	13	YMD8
0.01864	-2.2635	YML061C	148953	13	PIF1	Petite Integration Frequency
0.032828	-2.25728	YGR285C	1061852	7	ZUO1	ZUOtin
0.00575176	-2.24968	YER075C	308413	5	PTP3	Protein Tyrosine Phosphatase
0.0243995	-2.24281	YHL017W	70276	8
0.0281506	-2.23921	YLR196W	543968	12	PWP1	Periodic tryptophan (W) Protein
0.026133	-2.23802	YER147C-A	465203	5
0.0204751	-2.23125	YGR265W	1021648	7
0.0213245	-2.22331	YBR244W	707528	2	GPX2	Glutathione PeroXidase
0.0204751	-2.22275	YDR235W	933504	4	PRP42	Pre-mRNA Processing
0.0367467	-2.21844	YBL096C	43174	2
0.0183311	-2.21126	YPR119W	771653	16	CLB2	CycLin B
0.0444041	-2.20461	YPL068C	424215	16
0.0204751	-2.19821	YDL160C-A	169366	4	MHF2	Mph1-associated Histone-Fold protein
0.01864	-2.19365	YDL098C	284581	4	SNU23	Small NUclear ribonucleoprotein associated
0.029018	-2.19342	YDR418W	1301616	4	RPL12B	Ribosomal Protein of the Large subunit
0.0348114	-2.19312	YER078W-A	318646	5
0.0204751	-2.18732	YOR326W	925721	15	MYO2	MYOsin
0.0302222	-2.18706	YCR003W	118620	3	MRPL32	Mitochondrial Ribosomal Protein, Large subunit
0.0323267	-2.18522	YDR346C	1167214	4	SVF1	SurVival Factor
0.0427633	-2.17435	YMR285C	840144	13	NGL2
0.0243764	-2.17435	YLR064W	265456	12	PER33	Pore and ER protein, 33 kDa
0.0342254	-2.17089	YKL099C	255720	11	UTP11	U Three Protein
0.0204751	-2.16632	YNL213C	246460	14	RRG9	Required for Respiratory Growth
0.048062	-2.16584	YOL128C	78352	15	YGK3	Yeast homolog of Glycogen synthase Kinase
0.0403502	-2.16549	YGR118W	726974	7	RPS23A	Ribosomal Protein of the Small subunit
0.0461273	-2.15905	YPL249C-A	75699	16	RPL36B	Ribosomal Protein of the Large subunit
0.0475783	-2.15473	YKL011C	420155	11	CCE1	Cruciform Cutting Endonuclease
0.0242635	-2.15229	YAR014C	166742	1	BUD14	BUD site selection
0.0303312	-2.1505	YGL149W	225572	7
0.01864	-2.14965	YKR083C	596421	11	DAD2	Duo1 And Dam1 interacting
0.0218194	-2.13902	YMR033W	337788	13	ARP9	Actin-Related Protein
0.0451522	-2.1331	YGR194C	886073	7	XKS1	XyluloKinaSe
0.022437	-2.132	YPL126W	310210	16	NAN1	Net1 Associated Nuclear protein
0.022437	-2.13171	YMR287C	842436	13	DSS1	Deletion of SUV3 Supressor
0.0401595	-2.12819	YGR120C	730033	7	COG2	Conserved Oligomeric Golgi complex
0.0407793	-2.12425	YPL106C	350194	16	SSE1	Stress Seventy subfamily E
0.0491629	-2.12159	YOL152W	40748	15	FRE7	Ferric REductase
0.030713	-2.12082	YDL031W	394217	4	DBP10	Dead Box Protein
0.0213245	-2.11502	YOR172W	654210	15	YRM1	Yeast Reveromycin resistance Modulator
0.0364997	-2.11117	YLR223C	582233	12	IFH1	Interacts with Fork Head
0.00702051	-2.10207	YBR162C	563203	2	TOS1	Target Of Sbf
0.0447504	-2.09393	YKR042W	519527	11	UTH1	yoUTH
0.0472397	-2.09259	YKL096C-B	259073	11
0.0360166	-2.08994	YIL045W	271161	9	PIG2	Protein Interacting with Gsy2p
0.022437	-2.08767	YLR358C	843487	12
0.0213245	-2.08315	YKR100C	638901	11	SKG1	Suppressor of lethality of Kex2 Gas1 double null mutant
0.0166717	-2.07948	YPL007C	542082	16	TFC8	Transcription Factor C
0.0357536	-2.07735	YKR024C	485144	11	DBP7	Dead Box Protein
0.0348114	-2.07232	YDR301W	1063352	4	CFT1	Cleavage Factor Two
0.00619985	-2.07224	YNL010W	613635	14	PYP1	PolYol Phosphatase
0.0483292	-2.06815	YGL179C	163409	7	TOS3	Target Of Sbf
0.0218194	-2.05435	YNL185C	292193	14	MRPL19	Mitochondrial Ribosomal Protein, Large subunit
0.0201589	-2.05153	YKL074C	294610	11	MUD2	Mutant U1 Die
0.0308972	-2.05057	YNL167C	319416	14	SKO1	Suppressor of Kinase Overexpression
0.022437	-2.0481	YOR079C	473475	15	ATX2	AnTioXidant
0.0392592	-2.04388	YOR022C	373710	15	DDL1	DDHD Domain-containing Lipase
0.0316522	-2.04329	YIL010W	334882	9	DOT5	Disruptor Of Telomeric silencing
0.0226533	-2.04226	YNL056W	517249	14	OCA2	Oxidant-induced Cell cycle Arrest
0.0469991	-2.0415	YMR239C	748262	13	RNT1	RNase Three
0.0319838	-2.03938	YKL108W	234426	11	SLD2	Synthetically Lethal with Dpb11-1
0.0286401	-2.03932	YOR008C-A	342857	15
0.0326448	-2.03633	YGL137W	249869	7	SEC27	SECretory
0.0292016	-2.03275	YDR123C	698554	4	INO2	INOsitol requiring
0.024055	-2.03174	YIL098C	179772	9	FMC1	Formation of Mitochondrial Complexes
0.042225	-2.03149	YOR233W	775846	15	KIN4	KINase
0.0476044	-2.03043	YDR326C	1120609	4	YSP2	Yeast Suicide Protein
0.0396319	-2.02877	YPR009W	576552	16	SUT2	Sterol UpTake
0.037948	-2.02729	YPL264C	43283	16
0.0440335	-2.02688	YNR024W	672409	14	MPP6	M-Phase Phosphoprotein 6 homolog
0.0471847	-2.0252	YHL048W	6401	8	COS8	COnserved Sequence
0.0340973	-2.02263	YIR001C	356143	9	SGN1	Slower Growth on Non-fermentable carbon sources
0.0209598	-2.01923	YNL002C	626174	14	RLP7	Ribosomal-Like Protein
0.0380287	-2.01652	YJL133W	160619	10	MRS3	Mitochondrial RNA Splicing
0.0414672	-2.01186	YBL002W	236492	2	HTB2	Histone h Two B
0.0318513	-2.01061	YML031W	214189	13	NDC1	Nuclear Division Cycle
0.0264622	-2.00962	YER073W	304030	5	ALD5	ALdehyde Dehydrogenase
0.0326798	-2.00608	YNR009W	642690	14	NRM1	Negative Regulator of MBF targets
0.0242635	-2.00195	YOL033W	263475	15	MSE1	Mitochondrial aminoacyl-tRNA Synthetase, Glutamate (E)
0.0204751	-2.00058	YGR137W	762888	7
0.0243764	-1.99584	YKL097C	258503	11
0.0367619	-1.9938	YBR080C	398614	2	SEC18	SECretory
0.0364997	-1.99239	YLR452C	1039270	12	SST2	SuperSensiTive
0.01864	-1.99218	YMR077C	421484	13	VPS20	Vacuolar Protein Sorting
0.0439889	-1.98976	YMR164C	587274	13	MSS11	Multicopy Suppressor of STA genes
0.0336887	-1.98714	YML077W	111865	13	BET5	Blocked Early in Transport
0.0367467	-1.98697	YJR101W	618234	10	RSM26	Ribosomal Small subunit of Mitochondria
0.0433566	-1.97759	YHR070W	234881	8	TRM5	tRNA Methyltransferase
0.0375007	-1.97574	YDL145C	194571	4	COP1	COat Protein
0.0201589	-1.97454	YLL035W	68580	12	GRC3
0.022437	-1.97421	YDL164C	164987	4	CDC9	Cell Division Cycle
0.0243764	-1.97334	YOR158W	632164	15	PET123	PETite colonies
0.0231741	-1.9733	YDL225W	52445	4	SHS1	Seventh Homolog of Septin
0.024055	-1.97168	YJR102C	619157	10	VPS25	Vacuolar Protein Sorting
0.0415343	-1.97146	YBR254C	723736	2	TRS20	TRapp Subunit
0.022437	-1.97002	YNR040W	699690	14	MRX15	Mitochondrial oRganization of gene eXpression (MIOREX)
0.0414672	-1.9686	YDR240C	943674	4	SNU56	Small NUclear ribonucleoprotein associated
0.0218194	-1.9679	YGR074W	635712	7	SMD1	snRNA Sm binding site protein D1
0.0302222	-1.95928	YLR238W	614755	12	FAR10	Factor ARrest
0.0302222	-1.95807	YDR316W	1093763	4	OMS1	OXA1 Multicopy Suppressor
0.0367467	-1.95517	YOL113W	104326	15	SKM1	STE20/PAK homologous Kinase related to Morphogenesis
0.0129575	-1.95395	YER176W	541690	5	ECM32	ExtraCellular Mutant
0.0273622	-1.95116	YIL035C	287790	9	CKA1	Casein Kinase Alpha subunit
0.0348114	-1.94998	YBL085W	63876	2	BOI1	Bem1 (One) Interacting protein
0.0302222	-1.94869	YGR179C	853675	7	OKP1	Outer Kinetochore Protein
0.0396426	-1.94828	YDR488C	1429188	4	PAC11	Perish in the Absence of CIN8
0.0367619	-1.94764	YKR023W	483419	11	RQT4	Ribosome-Quality control Trigger factor
0.022437	-1.94652	YMR225C	720960	13	MRPL44	Mitochondrial Ribosomal Protein, Large subunit
0.0292085	-1.94388	YML007C-A	253162	13	MIN4	mitochondrial MINi protein of 4 kDa
0.0204751	-1.94211	YKL017C	405190	11	HCS1	dna HeliCaSe
0.014388	-1.93847	YMR130W	532119	13	DPI35	Delta-Psi dependent mitochondrial Import protein of 35 kDa
0.0325109	-1.93815	YLR386W	893628	12	VAC14	VACuole morphology and inheritance mutant
0.0474695	-1.93757	YPR073C	691933	16	LTP1	Low molecular weight protein Tyrosine Phosphatase
0.0292085	-1.93452	YNL169C	316169	14	PSD1	PhosphatidylSerine Decarboxylase
0.0235237	-1.93165	YJR055W	538772	10	HIT1	HIgh Temperature growth
0.0140125	-1.93094	YOR037W	401555	15	CYC2	CYtochrome C
0.0334921	-1.92864	YGL045W	414102	7	RIM8	Regulator of IME2
0.0433566	-1.92764	YDR077W	600793	4	SED1	Suppression of Exponential Defect
0.0362801	-1.92478	YER005W	160550	5	YND1	Yeast Nucleoside Diphosphatase
0.0360166	-1.92335	YIL104C	169982	9	SHQ1	Small nucleolar RNAs of the box H/ACA family Quantitative accumulation
0.0338173	-1.92327	YBR023C	284428	2	CHS3	CHitin Synthase-related
0.03468	-1.91787	YDR194C	845952	4	MSS116	Mitochondrial Splicing System
0.0360166	-1.91733	YHR085W	276764	8	IPI1	Involved in Processing ITS2
0.0204751	-1.91506	YMR247C	763351	13	RKR1	RING domain mutant Killed by Rtf1 deletion
0.0388814	-1.91293	YGL183C	156543	7	MND1	Meiotic Nuclear Divisions
0.0402184	-1.91244	YLL036C	66745	12	PRP19	Pre-RNA Processing
0.0272665	-1.90892	YLR139C	421542	12	SLS1	Synthetic Lethal with SSM4
0.0414672	-1.90701	YKR070W	573574	11
0.0320609	-1.90574	YML059C	153219	13	NTE1	Neuropathy Target Esterase
0.0302222	-1.90486	YIL118W	139752	9	RHO3	Ras HOmolog
0.0241551	-1.90261	YBR282W	768240	2	MRPL27	Mitochondrial Ribosomal Protein, Large subunit
0.0247255	-1.9025	YBR219C	662499	2
0.0202523	-1.90144	YKL115C	222893	11
0.0493777	-1.89512	YLR209C	560797	12	PNP1	purine nucleoside phosphorylase
0.0293419	-1.89184	YJL096W	246490	10	MRPL49	Mitochondrial Ribosomal Protein, Large subunit
0.0298946	-1.89041	YCL045C	44623	3	EMC1	ER Membrane protein Complex
0.0161154	-1.88987	YKL138C	185286	11	MRPL31	Mitochondrial Ribosomal Protein, Large subunit
0.0469736	-1.88916	YGR035C	557072	7
0.0235237	-1.88642	YJR142W	697141	10
0.0419092	-1.8821	YKL031W	382072	11
0.0204751	-1.88019	YDL150W	183343	4	RPC53	RNA Polymerase C
0.0463256	-1.87973	YER070W	298950	5	RNR1	RiboNucleotide Reductase
0.0218194	-1.87871	YDL226C	51115	4	GCS1	Growth Cold Sensitive
0.0362801	-1.87783	YLR051C	246324	12	FCF2	Faf1p Copurifying Factor
0.0286401	-1.87779	YPR043W	654166	16	RPL43A	Ribosomal Protein of the Large subunit
0.0370096	-1.87513	YBR024W	289445	2	SCO2	Suppressor of Cytochrome Oxidase deficiency
0.0467829	-1.87476	YKR095W-A	625864	11	PCC1	Polarized growth Chromatin-associated Controller
0.0230481	-1.87375	YGR148C	787312	7	RPL24B	Ribosomal Protein of the Large subunit
0.0204751	-1.87037	YBR262C	735720	2	MIC12	MItochondrial contact site and Cristae organizing system
0.0437661	-1.86858	YOL140W	58759	15	ARG8	ARGinine requiring	x
0.024055	-1.86784	YGR238C	966039	7	KEL2	KELch repeat
0.0251556	-1.85961	YMR192W	647118	13	GYL1	GYp Like
0.0442921	-1.85889	YAL035W	76427	1	FUN12	Function Unknown Now
0.0226807	-1.85413	YAL019W	114919	1	FUN30	Function Unknown Now
0.0440335	-1.85167	YMR265C	796540	13
0.038603	-1.84958	YKL033W-A	374505	11
0.0344305	-1.8489	YMR066W	401541	13	SOV1	Synthesis Of Var
0.0488867	-1.84229	YKR041W	518198	11
0.0370096	-1.84113	YGL026C	446412	7	TRP5	TRyPtophan	x
0.0348114	-1.83946	YOL114C	103317	15	PTH4	peptidyl tRNA hydrolase 4
0.0440213	-1.8391	YER186C	561705	5
0.0204751	-1.83538	YDR312W	1087581	4	SSF2	Suppressor of ste4 (Four)
0.0129575	-1.83387	YGL192W	142246	7	IME4	Inducer of MEiosis
0.0364997	-1.8324	YPL128C	306533	16	TBF1	TTAGGG repeat-Binding Factor
0.022437	-1.82979	YPR056W	671126	16	TFB4	Transcription Factor B subunit 4
0.0348114	-1.82821	YOR286W	850280	15	RDL2	RhoDanese-Like protein
0.020848	-1.82744	YKL209C	42423	11	STE6	STErile
0.031593	-1.82522	YLR376C	872826	12	PSY3	Platinum SensitivitY
0.029726	-1.82398	YNL147W	350940	14	LSM7	Like SM
0.0302222	-1.81914	YPR105C	736984	16	COG4	Conserved Oligomeric Golgi complex
0.031593	-1.81892	YMR281W	832339	13	GPI12	GlycosylPhosphatidylInositol anchor biosynthesis
0.0474695	-1.81629	YJL174W	95092	10	KRE9	Killer toxin REsistant
0.0361386	-1.81297	YDL105W	272389	4	NSE4	Non-SMC Element
0.0297855	-1.80923	YDL202W	98475	4	MRPL11	Mitochondrial Ribosomal Protein, Large subunit
0.0377635	-1.80832	YKL106W	237536	11	AAT1	Aspartate AminoTransferase	x
0.0204751	-1.80797	YLR325C	781143	12	RPL38	Ribosomal Protein of the Large subunit
0.0447504	-1.80774	YLR181C	516678	12	VTA1	VpsTwenty Associated
0.0360166	-1.80632	YLR222C-A	582006	12
0.0166717	-1.80529	YNL227C	220659	14	JJJ1	J-protein (Type III)
0.0367467	-1.80407	YBR061C	364787	2	TRM7	Transfer RNA Methyltransferase
0.021917	-1.79433	YKR027W	491364	11	BCH2	Bud7 and Chs6 Homolog
0.022437	-1.79208	YLR408C	933885	12	BLS1	BLoS1-homolog
0.01864	-1.79169	YNL254C	168043	14	RTC4	Restriction of Telomere Capping
0.0468156	-1.78972	YEL053C	53901	5	MAK10	MAintenance of Killer
0.0243764	-1.78945	YDR157W	769931	4
0.0498389	-1.78738	YGR189C	876669	7	CRH1	Congo Red Hypersensitive
0.0425289	-1.78464	YDR083W	612073	4	RRP8	Ribosomal RNA Processing
0.0319838	-1.78351	YMR039C	348644	13	SUB1	SUppressor of TFIIB mutations
0.0467801	-1.78171	YGL253W	23935	7	HXK2	HeXoKinase
0.0204751	-1.78133	YDR389W	1252537	4	SAC7	Suppressor of ACtin
0.0308833	-1.78012	YJL006C	423138	10	CTK2	Carboxy-Terminal domain Kinase
0.0416109	-1.77698	YCR088W	265068	3	ABP1	Actin Binding Protein
0.0469736	-1.7768	YPR079W	698869	16	MRL1	Mannose 6-phosphate Receptor Like
0.0132946	-1.77276	YDR416W	1298432	4	SYF1	SYnthetic lethal with cdcForty
0.0166717	-1.7725	YJL156C	126853	10	SSY5	Sulfonylurea Sensitive on YPD
0.0489869	-1.77247	YDR156W	769525	4	RPA14	RNA Polymerase A
0.0393057	-1.77083	YFR032C	222090	6	RRT5	Regulator of rDNA Transcription
0.0462741	-1.7707	YGL064C	381523	7	MRH4	Mitochondrial RNA Helicase
0.0427933	-1.77032	YFR037C	227513	6	RSC8	Remodel the Structure of Chromatin
0.0368978	-1.76661	YGR277C	1045644	7	CAB4	Coenzyme A Biosynthesis
0.0325109	-1.76568	YFL010C	115108	6	WWM1	WW domain containing protein interacting with Metacaspase
0.0359889	-1.76458	YCR027C	167370	3	RHB1	RHeB homolog
0.0226807	-1.76373	YGR173W	843854	7	RBG2	RiBosome interacting Gtpase
0.024095	-1.76362	YBR247C	713004	2	ENP1	Essential Nuclear Protein
0.0420977	-1.76204	YNL170W	315978	14
0.0204751	-1.76183	YLR032W	204991	12	RAD5	RADiation sensitive
0.047692	-1.75981	YHR107C	326813	8	CDC12	Cell Division Cycle
0.0286401	-1.75899	YGR217W	924696	7	CCH1	Calcium Channel Homolog
0.0226807	-1.75887	YKR075C	579827	11
0.0398086	-1.75806	YLR401C	922442	12	DUS3	DihydroUridine Synthase
0.024055	-1.75746	YNL308C	54122	14	KRI1	KRR1-Interacting protein
0.0232921	-1.75723	YMR295C	858297	13
0.0318795	-1.75319	YDR432W	1328783	4	NPL3	Nuclear Protein Localization
0.0472397	-1.75158	YKL130C	195288	11	SHE2	Swi5p-dependent HO Expression
0.0284679	-1.74816	YMR188C	636291	13	MRPS17	Mitochondrial Ribosomal Protein, Small subunit
0.0453403	-1.74794	YGR076C	637104	7	MRPL25	Mitochondrial Ribosomal Protein, Large subunit
0.0273164	-1.74792	YOR017W	361412	15	PET127	PETite colonies
0.020051	-1.74749	YGR093W	670388	7	DRN1	Debranching enzyme-associated RiboNuclease
0.0204751	-1.7416	YKL012W	418310	11	PRP40	Pre-mRNA Processing
0.0213245	-1.73866	YMR214W	695350	13	SCJ1	S. Cerevisiae DnaJ
0.0436025	-1.73719	YER006C-A	164344	5
0.0123016	-1.73652	YLR315W	764808	12	NKP2	Non-essential Kinetochore Protein
0.0373964	-1.73554	YBR027C	294024	2
0.0225696	-1.73399	YLR363C	852495	12	NMD4	Nonsense-Mediated mRNA Decay
0.0467801	-1.73334	YAL015C	126903	1	NTG1	eNdonuclease Three-like Glycosylase
0.0407793	-1.72435	YPL032C	488887	16	SVL3	Styryl dye Vacuolar Localization
0.0315889	-1.72212	YJR110W	633615	10	YMR1	Yeast Myotubularin Related
0.0376153	-1.72182	YGR202C	903474	7	PCT1	Phosphocholine CytidylylTransferase
0.031778	-1.72168	YGR219W	936035	7
0.022437	-1.7181	YMR131C	533163	13	RRB1	Regulator of Ribosome Biogenesis
0.0255552	-1.71738	YIL086C	200153	9
0.0322217	-1.71666	YPL038W	480535	16	MET31	METhionine requiring	x
0.0204751	-1.71653	YGL129C	267723	7	RSM23	Ribosomal Small subunit of Mitochondria
0.0267986	-1.71634	YPL011C	533642	16	TAF3	TATA binding protein-Associated Factor
0.0303312	-1.71328	YDR197W	851228	4	CBS2	Cytochrome B Synthesis
0.0300145	-1.71292	YKR060W	556518	11	UTP30	U Three Protein
0.0257734	-1.7115	YER034W	221846	5
0.0344305	-1.7107	YOR308C	894624	15	SNU66	Small NUclear ribonucleoprotein associated
0.0292016	-1.70969	YGL210W	93792	7	YPT32	Yeast Protein Two
0.0438184	-1.7089	YPL227C	120163	16	ALG5	Asparagine-Linked Glycosylation
0.025304	-1.70815	YNL155W	342516	14	CUZ1	Cdc48-associated UBL/Zn-finger protein
0.020051	-1.70275	YEL015W	126629	5	EDC3	Enhancer of mRNA DeCapping
0.0149252	-1.7008	YPL213W	150614	16	LEA1	Looks Exceptionally like U2A
0.0253761	-1.70039	YPL204W	164276	16	HRR25	HO and Radiation Repair
0.0297115	-1.69823	YLR169W	500335	12
0.00438211	-1.69685	YMR210W	687516	13	MGL2	MonoacylGlycerol Lipase
0.024095	-1.69118	YDR089W	622112	4	VTC5	Vacuole Transporter Chaperone
0.0286401	-1.69069	YHR018C	140011	8	ARG4	ARGinine requiring	x
0.0166717	-1.6906	YMR193W	650036	13	MRPL24	Mitochondrial Ribosomal Protein, Large subunit
0.0272665	-1.68766	YHR169W	442181	8	DBP8	Dead Box Protein
0.0204751	-1.68751	YBL023C	174920	2	MCM2	MiniChromosome Maintenance
0.0325197	-1.68629	YGR030C	545681	7	POP6	Processing Of Precursor RNAs
0.0242862	-1.6844	YOL107W	112102	15
0.0459807	-1.68154	YCR014C	139185	3	POL4	POLymerase
0.0204751	-1.68134	YCR097W	293835	3	HMRA1	Hidden Mat Right A
0.024055	-1.68074	YGR037C	559731	7	ACB1	Acyl-CoA-Binding
0.0396328	-1.68054	YLR245C	626502	12	CDD1	CytiDine Deaminase
0.0396426	-1.68052	YKR098C	633026	11	UBP11	UBiquitin-specific Protease
0.0360189	-1.68033	YOR115C	538659	15	TRS33	TRapp Subunit
0.0253761	-1.67432	YDR243C	948518	4	PRP28	Pre-mRNA Processing
0.0295103	-1.67032	YOR091W	493433	15	TMA46	Translation Machinery Associated
0.0396426	-1.67026	YOR130C	569929	15	ORT1	ORnithine Transporter
0.0367467	-1.66773	YOR087W	487707	15	YVC1	Yeast Vacuolar Conductance
0.0492333	-1.66683	YPR019W	596750	16	MCM4	MiniChromosome Maintenance
0.0204751	-1.66644	YDL236W	32296	4	PHO13	PHOsphate metabolism
0.0414672	-1.6664	YBR007C	248806	2	DSF2	Deletion Suppressor of mptFive/pufFive mutation
0.0458829	-1.66588	YLR453C	1041799	12	RIF2	Rap1p-Interacting Factor
0.0166717	-1.66526	YKL041W	360143	11	VPS24	Vacuolar Protein Sorting
0.0290712	-1.66504	YDR333C	1133260	4	RQC1	Ribosome Quality Control
0.0459807	-1.66181	YPL205C	163922	16
0.0286401	-1.66065	YGL232W	62075	7	TAN1	Trna AcetylatioN
0.0396426	-1.65964	YDR170C	796193	4	SEC7	SECretory
0.0490082	-1.65881	YPL249C	76669	16	GYP5	Gtpase-activating protein for Ypt Proteins
0.0204751	-1.65684	YGR035W-A	557565	7
0.0417839	-1.65664	YGR020C	526973	7	VMA7	Vacuolar Membrane Atpase
0.0273459	-1.65562	YNL081C	476188	14	SWS2	Sick Without Securin
0.0237805	-1.65482	YDR026C	492556	4	NSI1	NTS1 SIlencing protein 1
0.0214994	-1.65444	YOR025W	378219	15	HST3	Homolog of SIR Two (SIR2)
0.0256169	-1.65369	YOR174W	658747	15	MED4	MEDiator complex
0.021973	-1.65127	YPR144C	819765	16	NOC4	NucleOlar Complex associated
0.0272521	-1.6506	YDL074C	324047	4	BRE1	BREfeldin A sensitivity
0.0342254	-1.64952	YFL028C	79344	6	CAF16	CCR4 Associated Factor
0.036536	-1.64679	YLR132C	407283	12	USB1	U Six Biogenesis
0.0493076	-1.64677	YLR153C	445524	12	ACS2	Acetyl CoA Synthetase
0.0401305	-1.64422	YOR104W	517642	15	PIN2	Psi+ INducibility
0.0235495	-1.6433	YDL175C	144484	4	AIR2	Arginine methyltransferase-Interacting RING finger protein
0.0204751	-1.64172	YGL226W	73340	7	MTC3	Maintenance of Telomere Capping
0.0410923	-1.64053	YPL168W	231217	16	MRX4	Mitochondrial oRganization of gene eXpression (MIOREX)
0.0407793	-1.63808	YDR347W	1169178	4	MRP1	Mitochondrial Ribosomal Protein
0.0325109	-1.6374	YML009C	251304	13	MRPL39	Mitochondrial Ribosomal Protein, Large subunit
0.0392592	-1.63433	YGR056W	601661	7	RSC1	Remodel the Structure of Chromatin
0.0123016	-1.63289	YDR238C	937895	4	SEC26	SECretory
0.0443998	-1.63152	YLR285W	707360	12	NNT1	Nicotinamide N-methylTransferase
0.0296022	-1.63019	YJL148W	140437	10	RPA34	RNA Polymerase A
0.0391574	-1.62978	YKL208W	47157	11	CBT1	Cytochrome B Termination
0.0250709	-1.62635	YMR298W	863819	13	LIP1	Lag1p/Lac1p Interacting Protein
0.0382283	-1.62613	YKL029C	382716	11	MAE1	MAlic Enzyme
0.0352184	-1.62506	YHR028W-A	167352	8
0.0367467	-1.62111	YOR281C	846269	15	PLP2	Phosducin-Like Protein
0.0415939	-1.62097	YLR107W	364116	12	REX3	Rna EXonuclease
0.0398397	-1.62047	YGR240C	970771	7	PFK1	PhosphoFructoKinase
0.037625	-1.61847	YNL038W	557020	14	GPI15	GlycosylPhosphatidylInositol anchor biosynthesis
0.0355048	-1.61641	YIL070C	230272	9	MAM33	Mitochondrial Acidic Matrix protein
0.039874	-1.61475	YMR159C	574476	13	ATG16	AuTophaGy related
0.0288829	-1.61454	YMR044W	355384	13	IOC4	Iswi One Complex
0.0148599	-1.61354	YDR086C	616928	4	SSS1	Sec Sixty-one Suppressor
0.0470583	-1.61085	YKL211C	36699	11	TRP3	TRyPtophan	x
0.024055	-1.61083	YKL156W	158613	11	RPS27A	Ribosomal Protein of the Small subunit
0.0316522	-1.60974	YDR334W	1135932	4	SWR1	SWi2/snf2-Related
0.0235237	-1.60896	YJR154W	725784	10
0.0302222	-1.60747	YNL217W	240331	14	PPN2
0.047062	-1.6061	YNL255C	167329	14	GIS2	GIg Suppressor
0.0427534	-1.60433	YCR015C	141217	3	CTO1	Cold TOlerance
0.0262631	-1.60388	YNL032W	574506	14	SIW14	Synthetic Interaction with Whi2
0.0415094	-1.60348	YFL049W	36803	6	SWP82	SWi/snf-associated Protein
0.0212019	-1.60305	YMR277W	820256	13	FCP1	tfiiF-associating component of Ctd Phosphatase
0.0322369	-1.60031	YGR165W	829116	7	MRPS35	Mitochondrial Ribosomal Protein, Small subunit
0.0342254	-1.59464	YFL004W	131810	6	VTC2	Vacuolar Transporter Chaperone
0.036214	-1.59267	YNL079C	478566	14	TPM1	TroPoMyosin
0.020051	-1.59122	YLR292C	719789	12	SEC72	SECretory
0.0348078	-1.59068	YNL297C	71673	14	MON2	MONensin sensitivity
0.0213245	-1.59034	YDR495C	1438115	4	VPS3	Vacuolar Protein Sorting
0.0226807	-1.59016	YCL029C	68599	3	BIK1	BIlateral Karyogamy defect
0.0204751	-1.59001	YDR031W	503498	4	MIX14	Mitochondrial Intermembrane space CX(n)C motif protein
0.0226807	-1.58605	YBL031W	161699	2	SHE1	Sensitivity to High Expression
0.0493228	-1.58517	YNL016W	602907	14	PUB1	PolyUridylate Binding
0.0253761	-1.58375	YMR309C	892988	13	NIP1	Nuclear ImPort
0.0402212	-1.58192	YBL046W	132424	2	PSY4	Platinum SensitivitY
0.0496332	-1.58189	YPR024W	610481	16	YME1	Yeast Mitochondrial Escape
0.022437	-1.58164	YKR036C	508702	11	CAF4	CCR4 Associated Factor
0.0417095	-1.58047	YIL123W	128151	9	SIM1	Start Independent of Mitosis
0.0404219	-1.58015	YGR169C-A	836387	7	LSO2	Late-annotated Small Open reading frame
0.0292085	-1.58014	YOL164W	6175	15	BDS1	Bacterially Derived Sulfatase
0.0362221	-1.57993	YER058W	271768	5	PET117	PETite colonies
0.0292602	-1.57975	YOR367W	1026007	15	SCP1	S. cerevisiae CalPonin
0.0319838	-1.57819	YLR357W	841331	12	RSC2	Remodel the Structure of Chromatin
0.0392592	-1.5781	YNL039W	555048	14	BDP1	B Double Prime
0.0360189	-1.57773	YPR018W	594476	16	RLF2	Rap1 protein Localization Factor
0.0414672	-1.57501	YJR052W	532062	10	RAD7	RADiation sensitive
0.0214994	-1.5748	YOR254C	805032	15	SEC63	SECretory
0.0364997	-1.57425	YHR017W	138694	8	YSC83
0.0244007	-1.57343	YBR206W	634601	2
0.0292085	-1.57184	YMR284W	838187	13	YKU70	Yeast KU protein
0.0338173	-1.57156	YPL132W	301716	16	COX11	Cytochrome c OXidase
0.01864	-1.57098	YJL156W-A	126604	10
0.01864	-1.56826	YBR293W	787006	2	VBA2	Vacuolar Basic Amino acid transporter	x
0.0212019	-1.56662	YNL053W	529942	14	MSG5	Multicopy Suppressor of GPA1
0.0349643	-1.56549	YNL024C	587107	14	EFM6	Elongation Factor Methyltransferase
0.01217	-1.56502	YMR306W	881159	13	FKS3	FK506 Sensitivity
0.0272665	-1.56427	YGL076C	364335	7	RPL7A	Ribosomal Protein of the Large subunit
0.0114192	-1.5638	YBL095W	43277	2	MRX3	Mitochondrial oRganization of gene eXpression (MIOREX)
0.0485187	-1.56264	YCR053W	216697	3	THR4	THReonine requiring	x
0.0295423	-1.56167	YIL009C-A	335666	9	EST3	Ever Shorter Telomeres
0.047062	-1.56081	YEL068C	25646	5
0.0348078	-1.55967	YJR109C	629585	10	CPA2	Carbamyl Phosphate synthetase A
0.0204751	-1.5593	YMR283C	835326	13	RIT1	Ribosylation of Initiator tRNA
0.0292085	-1.55867	YLL011W	127523	12	SOF1	Suppressor Of Fibrillarin
0.0243764	-1.55786	YHR178W	459299	8	STB5	Sin Three Binding protein
0.0396426	-1.55514	YOR305W	889022	15	RRG7	Required for Respiratory Growth
0.0483772	-1.55478	YDL030W	397537	4	PRP9	Pre-mRNA Processing
0.0296022	-1.5547	YNL083W	471377	14	SAL1	Suppressor of Aac2 Lethality
0.0344305	-1.55367	YDR176W	814452	4	NGG1
0.0272665	-1.55154	YGR072W	634304	7	UPF3	UP Frameshift
0.0428646	-1.55111	YLR172C	501260	12	DPH5	DiPHthamide
0.0204751	-1.54779	YNR050C	714048	14	LYS9	LYSine requiring	x
0.0338173	-1.54545	YOR048C	418630	15	RAT1	Ribonucleic Acid Trafficking
0.0379134	-1.54544	YNL063W	507758	14	MTQ1	Methyltransferase
0.0402212	-1.54538	YMR294W-A	858209	13
0.0314154	-1.54507	YKL079W	286603	11	SMY1	Suppressor of MYo2-66
0.0396734	-1.54372	YIL009W	339344	9	FAA3	Fatty Acid Activation
0.0377635	-1.54261	YLR221C	578362	12	RSA3	RiboSome Assembly
0.0419092	-1.54223	YLR398C	915156	12	SKI2	SuperKIller
0.0390582	-1.54203	YBR245C	708150	2	ISW1	Imitation SWitch subfamily
0.0214994	-1.5407	YLR114C	374944	12	AVL9	Apl2 Vps1 Lethal
0.0235237	-1.53973	YIL021W	312905	9	RPB3	RNA Polymerase B
0.0359889	-1.53661	YOL142W	55558	15	RRP40	Ribosomal RNA Processing
0.0204751	-1.53643	YJL092W	257423	10	SRS2	Suppressor of Rad Six
0.0418013	-1.53574	YDL156W	174918	4	CMR1	Changed Mutation Rate
0.00575176	-1.53388	YLR412W	948368	12	BER1	Benomyl REsistant 1
0.0474695	-1.53135	YDL192W	116321	4	ARF1	ADP-Ribosylation Factor
0.0456514	-1.53101	YDR131C	716790	4
0.00719057	-1.52957	YBR158W	556549	2	AMN1	Antagonist of Mitotic exit Network
0.0243995	-1.52904	YPR187W	911257	16	RPO26	RNA POlymerase
0.0204751	-1.52838	YLR244C	625168	12	MAP1	Methionine AminoPeptidase	x
0.0375016	-1.52825	YDR402C	1272234	4	DIT2	DITyrosine
0.0364997	-1.52699	YDR407C	1284069	4	TRS120	TRapp Subunit
0.0113925	-1.52689	YPL030W	493543	16	TRM44	TRna Methyltransferase
0.0225696	-1.52614	YCR081W	254371	3	SRB8	Suppressor of RNA polymerase B
0.0292085	-1.52553	YBR264C	737770	2	YPT10	Yeast Protein Two
0.0166717	-1.52464	YMR001C	269019	13	CDC5	Cell Division Cycle
0.0423249	-1.5238	YDR527W	1491094	4	RBA50	RNA polymerase II (B) Associated protein
0.01132	-1.52356	YIL019W	315093	9	FAF1	Forty (40) S Assembly Factor
0.025479	-1.52259	YOR252W	803667	15	TMA16	Translation Machinery Associated
0.0385539	-1.52239	YNL221C	231068	14	POP1	Processing Of Precursor RNAs
0.0496332	-1.52189	YCL055W	27929	3	KAR4	KARyogamy
0.0293206	-1.52188	YGL093W	334886	7	SPC105	Spindle Pole Component
0.0460479	-1.51948	YLR448W	1028854	12	RPL6B	Ribosomal Protein of the Large subunit
0.0272665	-1.51847	YNL124W	392892	14	NAF1	Nuclear Assembly Factor
0.021042	-1.51813	YML105C	57866	13	SEC65	SECretory
0.043292	-1.51794	YNR055C	728426	14	HOL1	HistidinOl
0.0304084	-1.51778	YNR003C	634344	14	RPC34	RNA Polymerase C
0.0421069	-1.51705	YHR004C	111754	8	NEM1	Nuclear Envelope Morphology
0.0204751	-1.51441	YLR268W	680200	12	SEC22	SECretory
0.0385539	-1.51246	YML122C	26038	13
0.0396426	-1.51063	YDL183C	130871	4	MRX19	Mitochondrial oRganization of gene eXpression (MIOREX)
0.0306138	-1.50738	YBL090W	48825	2	MRP21	Mitochondrial Ribosomal Protein
0.0303312	-1.5069	YNR045W	706139	14	PET494	PETite colonies
0.0271878	-1.50563	YGR250C	991176	7	RIE1	Restoration of Impaired growths of ERMES-lacking cells
0.0395329	-1.49902	YLR226W	589354	12	BUR2	Bypass UAS Requirement
0.024055	-1.49835	YEL026W	101943	5	SNU13	Small NUclear ribonucleoprotein associated
0.0204751	-1.49808	YMR121C	509734	13	RPL15B	Ribosomal Protein of the Large subunit
0.0382972	-1.49678	YMR211W	689083	13	DML1	Drosophila melanogaster Misato-Like protein
0.0426051	-1.49641	YDR447C	1354829	4	RPS17B	Ribosomal Protein of the Small subunit
0.0391168	-1.49499	YER050C	253971	5	RSM18	Ribosomal Small subunit of Mitochondria
0.0308972	-1.49421	YER008C	167808	5	SEC3	SECretory
0.0336887	-1.49319	YDL012C	431108	4
0.0391574	-1.49276	YOL108C	111431	15	INO4	INOsitol requiring
0.0235366	-1.49274	YER087W	330576	5	AIM10	Altered Inheritance rate of Mitochondria
0.0302623	-1.49002	YBR163W	565723	2	EXO5	EXOnuclease V
0.0241551	-1.48952	YER092W	342855	5	IES5	Ino Eighty Subunit
0.0428934	-1.48785	YJL054W	334265	10	TIM54	Translocase of the Inner Mitochondrial membrane
0.0453267	-1.48747	YBL054W	117589	2	TOD6	Twin Of Dot6p
0.00688502	-1.48508	YGL119W	284442	7	COQ8	COenzyme Q
0.0499198	-1.48338	YLR146C	432823	12	SPE4	SPErmidine auxotroph
0.036536	-1.482	YGL107C	304333	7	RMD9	Required for Meiotic nuclear Division
0.0297186	-1.48128	YNL164C	325265	14	IBD2	Inhibition of Bud Division 2
0.0308386	-1.4796	YBR267W	739841	2	REI1	REquired for Isotropic bud growth
0.0226807	-1.47951	YNL133C	374171	14	FYV6	Function required for Yeast Viability
0.0486684	-1.47941	YKL213C	31960	11	DOA1	Degradation Of Alpha
0.031593	-1.47838	YNL088W	457704	14	TOP2	TOPoisomerase
0.031593	-1.478	YGL178W	167352	7	MPT5	Multicopy suppressor of Pop Two
0.0318513	-1.47601	YLR263W	670340	12	RED1	REDuctional division
0.00215829	-1.47119	YLR059C	259738	12	REX2	Rna EXonuclease
0.0414672	-1.47113	YIL138C	89230	9	TPM2	TroPoMyosin
0.0292085	-1.46993	YJR122W	649776	10	IBA57	Iron-sulfur cluster assembly factor for Biotin synthase and Aconitase-like mitochondrial proteins
0.0264622	-1.46922	YNL110C	417826	14	NOP15	NucleOlar Protein
0.0281506	-1.46854	YDR414C	1295598	4	ERD1	Endoplasmic reticulum Retention Defective
0.0475783	-1.46854	YFL016C	104701	6	MDJ1	Mitochondrial DnaJ
0.0405373	-1.46728	YDR375C	1225166	4	BCS1	ubiquinol-cytochrome c reductase (bc1) Synthesis
0.0408048	-1.46714	YGR245C	979765	7	SDA1	Severe Depolymerization of Actin
0.029018	-1.46669	YDR172W	808324	4	SUP35	SUPpressor
0.0338949	-1.46564	YPL040C	475993	16	ISM1	Isoleucyl tRNA Synthetase of Mitochondria
0.0447504	-1.46544	YLR277C	697156	12	YSH1	Yeast Seventy-three Homolog
0.0302222	-1.46487	YDR038C	527422	4	ENA5	Exitus NAtru (Latin, "exit sodium")
0.043292	-1.46486	YNL128W	382359	14	TEP1	TEnsin-like Phosphatase
0.0281861	-1.46457	YKL095W	262277	11	YJU2
0.0392592	-1.46375	YAL011W	132199	1	SWC3	SWr Complex
0.0407825	-1.46368	YBR133C	501804	2	HSL7	Histone Synthetic Lethal
0.0475783	-1.46306	YGR144W	780399	7	THI4	THIamine metabolism	x
0.0218194	-1.46249	YAL024C	101565	1	LTE1	Low Temperature Essential
0.01864	-1.46009	YDR151C	764178	4	CTH1	Cysteine-Three-Histidine
0.0474695	-1.45769	YJL095W	247255	10	BCK1	Bypass of C Kinase
0.0221592	-1.45752	YFR046C	243074	6	CNN1	Co-purified with NNf1p
0.0248473	-1.45726	YDL182W	133437	4	LYS20	LYSine requiring	x
0.0348114	-1.45711	YHL004W	99219	8	MRP4	Mitochondrial Ribosomal Protein
0.0302222	-1.45337	YJR140C	690750	10	HIR3	HIstone Regulation
0.0342806	-1.45297	YFR003C	152657	6	YPI1	Yeast Phosphatase Inhibitor
0.0348114	-1.45275	YPR132W	794965	16	RPS23B	Ribosomal Protein of the Small subunit
0.0292085	-1.45209	YFR005C	154527	6	SAD1	SnRNP Assembly Defective
0.0419917	-1.45199	YNL264C	145563	14	PDR17	Pleiotropic Drug Resistance
0.021042	-1.45149	YER078C	316807	5	ICP55	Intermediate Cleaving Peptidase
0.0439139	-1.45119	YDL044C	373967	4	MTF2	Mitochondrial Transcription Factor
0.0475783	-1.45098	YHR002W	108812	8	LEU5	LEUcine biosynthesis	x
0.0204751	-1.45003	YBR223C	668663	2	TDP1	Tyrosyl-DNA Phosphodiesterase
0.0370043	-1.44926	YDR475C	1407464	4	JIP4	Jumonji domain Interacting Protein
0.0324779	-1.44919	YJL046W	352386	10	AIM22	Altered Inheritance rate of Mitochondria
0.0367467	-1.44912	YDL219W	65242	4	DTD1	D-Tyr-tRNA(Tyr) Deacylase
0.0427534	-1.44877	YHR167W	439342	8	THP2	THO2 - HPR1 Phenotype
0.0248473	-1.44851	YOR239W	784857	15	ABP140	Actin Binding Protein
0.0267668	-1.4463	YDR392W	1258696	4	SPT3	SuPpressor of Ty's
0.0302623	-1.44406	YBL018C	185998	2	POP8	Processing Of Precursor RNAs
0.031593	-1.44394	YKL206C	49006	11	ADD66	Alpha1-proteinase inhibitor-Degradation Deficient
0.0306977	-1.44284	YBR152W	546376	2	SPP381	Suppressor of PrP38-1
0.0330256	-1.44176	YDR303C	1068729	4	RSC3	Remodel the Structure of Chromatin
0.0257026	-1.44013	YDR046C	548762	4	BAP3	Branched-chain Amino acid Permease	x
0.0342254	-1.43868	YPL207W	159909	16	TYW1	Trna-YW synthesizing protein
0.031593	-1.43619	YGL103W	310967	7	RPL28	Ribosomal Protein of the Large subunit
0.0319838	-1.43613	YKL073W	296430	11	LHS1	Lumenal Hsp Seventy
0.0253761	-1.43606	YBR159W	558685	2	IFA38
0.0297186	-1.43432	YDR159W	771877	4	SAC3	Suppressor of ACtin
0.0359889	-1.43301	YGR104C	697445	7	SRB5	Suppressor of RNA polymerase B
0.0438184	-1.43206	YLL021W	100947	12	SPA2	Spindle Pole Antigen
0.0498138	-1.42913	YGR222W	939923	7	PET54	PETite colonies
0.0324779	-1.4289	YBR098W	441515	2	MMS4	Methyl MethaneSulfonate sensitivity
0.0271878	-1.4289	YMR269W	804456	13	TMA23	Translation Machinery Associated
0.0483292	-1.42681	YEL019C	120498	5	MMS21	Methyl MethaneSulfonate sensitivity
0.0207084	-1.42643	YGR239C	969187	7	PEX21	PEroXin
0.0360166	-1.42619	YML056C	162194	13	IMD4	IMP Dehydrogenase
0.029018	-1.4261	YMR307W	887003	13	GAS1	Glycophospholipid-Anchored Surface protein
0.0348114	-1.42599	YIR018W	384609	9	YAP5	Yeast AP-1
0.0268655	-1.42538	YJR092W	598735	10	BUD4	BUD site selection
0.0370096	-1.42255	YBR155W	549771	2	CNS1	CyclophiliN Seven suppressor
0.0201589	-1.42223	YPL269W	33013	16	KAR9	KARyogamy
0.0396426	-1.42214	YBL021C	181660	2	HAP3	Heme Activator Protein
0.0226807	-1.42178	YLR079W	286820	12	SIC1	Substrate/Subunit Inhibitor of Cyclin-dependent protein kinase
0.0243764	-1.42111	YDR108W	671269	4	TRS85	TRapp Subunit
0.0235237	-1.42025	YGL194C	140368	7	HOS2	Hda One Similar
0.0281506	-1.41922	YBR060C	360652	2	ORC2	Origin Recognition Complex
0.0299435	-1.41747	YMR257C	779629	13	PET111	PETite colonies
0.0292085	-1.41564	YBR042C	320416	2	CST26	Chromosome STability
0.0242635	-1.41469	YKL082C	281025	11	RRP14	Ribosomal RNA Processing
0.0258279	-1.41466	YJL013C	409493	10	MAD3	Mitotic Arrest-Deficient
0.0427933	-1.41261	YML026C	222987	13	RPS18B	Ribosomal Protein of the Small subunit
0.0213245	-1.41225	YBR166C	569842	2	TYR1	TYRosine	x
0.0352347	-1.41151	YAL010C	134184	1	MDM10	Mitochondrial Distribution and Morphology
0.0237164	-1.41121	YLR078C	285736	12	BOS1	Bet One Suppressor
0.0496038	-1.40709	YLR033W	208761	12	RSC58	Remodel the Structure of Chromatin
0.0358701	-1.40702	YOR323C	921535	15	PRO2	PROline requiring
0.0296022	-1.40516	YJR089W	587718	10	BIR1	Baculoviral IAP Repeat-containing protein
0.0367619	-1.4043	YLR416C	954491	12
0.0303312	-1.40364	YLR146W-A	433870	12
0.0272665	-1.40288	YLR418C	956914	12	CDC73	Cell Division Cycle
0.0321213	-1.40234	YPL043W	469939	16	NOP4	NucleOlar Protein
0.0312366	-1.40232	YKR079C	586789	11	TRZ1	tRNase Z
0.0359889	-1.40171	YHR122W	353625	8	CIA2	Cytosolic Iron-sulfur protein Assembly
0.0232921	-1.40155	YMR304C-A	878780	13
0.0437236	-1.40073	YJL115W	196287	10	ASF1	Anti-Silencing Function
0.0292085	-1.40015	YAL041W	62840	1	CDC24	Cell Division Cycle
0.0407793	-1.39913	YLR310C	752224	12	CDC25	Cell Division Cycle
0.0359945	-1.39847	YNL076W	483556	14	MKS1	Multicopy Kinase Suppressor
0.0406631	-1.39795	YFR007W	159299	6	YFH7
0.0334921	-1.39776	YBR157C	553543	2	ICS2	Increased Copper Sensitivity
0.0440335	-1.3974	YGL111W	299978	7	NSA1	Nop Seven Associated
0.0359889	-1.39648	YMR212C	690695	13	EFR3	PHO Eighty Five Requiring
0.0380287	-1.39468	YJL209W	38005	10	CBP1	Cytochrome B mRNA Processing
0.0378716	-1.39424	YDL217C	67983	4	TIM22	Translocase of the Inner Mitochondrial membrane
0.0226807	-1.39395	YDR120C	691549	4	TRM1	tRNA Methyltransferase
0.0257107	-1.39368	YBR268W	741299	2	MRPL37	Mitochondrial Ribosomal Protein, Large subunit
0.0427933	-1.39316	YDR295C	1052623	4	HDA2	Histone DeAcetylase
0.0341712	-1.39282	YHR073W	242582	8	OSH3	OxySterol binding protein Homolog
0.0318513	-1.39264	YPR175W	888974	16	DPB2	DNA Polymerase B subunit 2
0.0359889	-1.39133	YPL169C	229039	16	MEX67	Messenger RNA EXport factor of 67 kDa
0.0497556	-1.39124	YDL020C	415113	4	RPN4	Regulatory Particle Non-ATPase
0.0235237	-1.39116	YOR008W-B	343929	15
0.0364997	-1.39094	YBR162W-A	565231	2	YSY6
0.0345451	-1.39076	YBR205W	633622	2	KTR3	Kre Two Related
0.0382972	-1.39063	YLR099C	339744	12	ICT1	Increased Copper Tolerance
0.0204751	-1.38867	YDR376W	1226822	4	ARH1	Adrenodoxin Reductase Homolog
0.0392592	-1.38845	YGL023C	450197	7	PIB2	PhosphatidylInositol(3)-phosphate Binding
0.0290552	-1.38751	YMR091C	450058	13	NPL6	Nuclear Protein Localization
0.0348078	-1.38633	YJR075W	573981	10	HOC1	Homologous to OCh1
0.0471071	-1.3837	YPL225W	126006	16
0.0129575	-1.38312	YML011C	246895	13	RAD33	RADiation sensitive
0.0359889	-1.38245	YJL062W-A	316723	10	COA3	Cytochrome Oxidase Assembly
0.0420977	-1.38122	YHR068W	232133	8	DYS1	DeoxyhYpusine Synthase
0.0399736	-1.38098	YFR027W	207452	6	ECO1	Establishment of COhesion
0.0204751	-1.38051	YKR090W	608946	11	PXL1	PaXillin-Like protein
0.0436025	-1.37925	YAL047C	54989	1	SPC72	Spindle Pole Component
0.024055	-1.37902	YOR106W	519121	15	VAM3	VAcuolar Morphogenesis
0.0478122	-1.37704	YOL078W	181682	15	AVO1	Adheres VOraciously (to TOR2)
0.0398397	-1.37683	YCR024C	160744	3	SLM5	Synthetic Lethal with Mss4
0.0362526	-1.3763	YDR198C	852533	4	RKM2	Ribosomal protein lysine (K) Methyltransferase
0.0440335	-1.37547	YIR007W	370704	9	EGH1	Cryptococcus neoformans EGCrP2 Homolog
0.0267986	-1.37492	YJR067C	567019	10	YAE1
0.0368978	-1.37389	YLR006C	161755	12	SSK1	Suppressor of Sensor Kinase
0.0497368	-1.37352	YPR166C	876282	16	MRP2	Mitochondrial Ribosomal Protein
0.0272665	-1.37266	YNR023W	670418	14	SNF12	Sucrose NonFermenting
0.0364997	-1.37155	YDR071C	588827	4	PAA1	PolyAmine Acetyltransferase
0.0392279	-1.37144	YPR094W	720637	16	RDS3	Regulator of Drug Sensitivity
0.0297186	-1.36751	YDR489W	1431012	4	SLD5	Synthetic Lethality with Dpb11-1
0.0498138	-1.36461	YKR006C	450423	11	MRPL13	Mitochondrial Ribosomal Protein, Large subunit
0.0396426	-1.3626	YBL074C	86722	2	AAR2	A1-Alpha2 Repression
0.0303459	-1.36206	YLR054C	248717	12	OSW2	Outer Spore Wall
0.0360166	-1.36175	YDL045W-A	372248	4	MRP10	Mitochondrial Ribosomal Protein
0.01864	-1.36127	YDR228C	921926	4	PCF11	Protein 1 of Cleavage and polyadenylation Factor I
0.0423061	-1.36024	YGL110C	301537	7	CUE3	Coupling of Ubiquitin conjugation to ER degradation
0.0204751	-1.35866	YBL017C	186844	2	PEP1	carboxyPEPtidase Y-deficient
0.0241551	-1.35842	YDR480W	1417399	4	DIG2	Down-regulator of Invasive Growth
0.0319838	-1.35813	YPR025C	613377	16	CCL1
0.0441511	-1.35632	YDR292C	1043146	4	SRP101	Signal Recognition Particle
0.0418016	-1.35613	YLR338W	804346	12	OPI9	OverProducer of Inositol
0.049567	-1.35575	YPR152C	832061	16	URN1	U2-U5-U6 snRNP, RES complex, and NTC interacting protein
0.0302222	-1.35487	YPL137C	292817	16	GIP3	Glc7 Interacting Protein
0.0292085	-1.35335	YOL117W	97551	15	RRI2
0.0204751	-1.35243	YBL076C	81043	2	ILS1	IsoLeucine-tRNA Synthetase
0.0204751	-1.35092	YGR142W	772454	7	BTN2	BaTteN disease
0.0308386	-1.35037	YEL057C	45020	5	SDD1	Suppressor of Degenerative Death
0.031593	-1.35004	YGR147C	786054	7	NAT2	N-terminal AcetylTransferase
0.047692	-1.34992	YLR457C	1055812	12	NBP1	Nap1 Binding Protein
0.0226342	-1.34949	YGL200C	122694	7	EMP24	EndoMembrane Protein
0.0308833	-1.34892	YER077C	314534	5	MRX1	Mitochondrial oRganization of gene eXpression (MIOREX)
0.0362801	-1.34882	YDR088C	618497	4	SLU7	Synergistic Lethal with U5 snRNA
0.0403502	-1.34807	YGR199W	897502	7	PMT6	Protein O-MannosylTransferase
0.022437	-1.34638	YJL131C	164278	10	AIM23	Altered Inheritance rate of Mitochondria
0.0374876	-1.34596	YDL107W	268921	4	MSS2	Mitochondrial Splicing
0.020051	-1.34572	YIL148W	68708	9	RPL40A	Ribosomal Protein of the Large subunit
0.031593	-1.3454	YLR382C	882067	12	NAM2	Nuclear Accommodation of Mitochondria
0.0496038	-1.34447	YPR139C	813156	16	LOA1	Lysophosphatidic acid: Oleoyl-CoA Acyltransferase
0.0495545	-1.34343	YDR493W	1436217	4	MZM1	Mitochondrial Zinc Maintenance
0.0292085	-1.34236	YGL058W	393986	7	RAD6	RADiation sensitive
0.0243764	-1.34202	YCL048W	42165	3	SPS22	SPorulation Specific 2 too (2)
0.0302222	-1.34097	YKR056W	549448	11	TRM2	tRNA Methyltransferase
0.028551	-1.3407	YOR171C	652010	15	LCB4	Long-Chain Base
0.0204751	-1.34017	YHR156C	411384	8	LIN1	LINk
0.0183311	-1.33993	YOR211C	738924	15	MGM1	Mitochondrial Genome Maintenance
0.0303312	-1.33885	YDR182W	827582	4	CDC1	Cell Division Cycle
0.0253761	-1.33868	YHL019C	67731	8	APM2	clathrin Adaptor Protein complex Medium chain
0.0340973	-1.33841	YGL163C	193707	7	RAD54	RADiation sensitive
0.0294217	-1.33801	YDR371W	1219413	4	CTS2	ChiTinaSe
0.0409357	-1.33782	YOL115W	101475	15	PAP2	Poly(A) Polymerase
0.0308748	-1.33708	YER151C	469686	5	UBP3	UBiquitin-specific Protease
0.0449875	-1.33431	YJL007C	422698	10
0.0441511	-1.33404	YDL040C	378874	4	NAT1	N-terminal AcetylTransferase
0.036536	-1.33239	YMR111C	492404	13	EUC1	Enriches Ubiquitin on Chromatin
0.0281506	-1.33229	YER016W	188277	5	BIM1	BInding to Microtubules
0.0492771	-1.33161	YBR257W	728885	2	POP4	Processing Of Precursor RNAs
0.001321	-1.33144	YOR188W	685767	15	MSB1	Multicopy Suppression of a Budding defect
0.0348114	-1.33128	YLR239C	616332	12	LIP2	LIPoyl ligase
0.0292636	-1.32795	YDL028C	400997	4	MPS1	MonoPolar Spindle
0.047062	-1.32688	YOR376W-A	1045196	15
0.0303312	-1.32656	YOL112W	106710	15	MSB4	Multicopy Suppression of a Budding defect
0.0201589	-1.32654	YOL029C	269815	15
0.0276386	-1.32616	YER148W	465303	5	SPT15	SuPpressor of Ty insertions
0.01132	-1.32593	YMR179W	619858	13	SPT21	SuPpressor of Ty
0.0380287	-1.32406	YBR271W	744852	2	EFM2	Elongation Factor Methyltransferase
0.0302222	-1.32098	YML117W	34243	13	NAB6	Nucleic Acid Binding protein
0.0286401	-1.32008	YDL161W	167714	4	ENT1	Epsin N-Terminal homology
0.0440213	-1.31914	YMR230W	732414	13	RPS10B	Ribosomal Protein of the Small subunit
0.0418016	-1.31847	YMR028W	327482	13	TAP42	Two A phosphatase Associated Protein
0.038373	-1.31847	YIR024C	402841	9	INA22	INner membrane Assembly 22 kDa
0.0342254	-1.31268	YER022W	198812	5	SRB4	Suppressor of RNA polymerase B
0.0204751	-1.31246	YLR119W	385534	12	SRN2	Suppressor of Rna mutations, Number 2
0.0385539	-1.31219	YDR532C	1499396	4	KRE28
0.0166717	-1.3115	YDR016C	478474	4	DAD1	Duo1 And Dam1 interacting
0.0241551	-1.31094	YNL152W	346313	14	INN1	required for INgressioN
0.0367467	-1.30871	YFR048W	246146	6	RMD8	Required for Meiotic nuclear Division
0.0467829	-1.30627	YMR251W	772915	13	GTO3	Glutathione Transferase Omega-like
0.0338173	-1.30527	YHR108W	328303	8	GGA2	Golgi-localized, Gamma-adaptin ear homology, Arf-binding protein
0.0263406	-1.30496	YLR086W	302243	12	SMC4	Structural Maintenance of Chromosomes
0.0288829	-1.3047	YDR055W	563527	4	PST1	Protoplasts-SecreTed
0.045999	-1.30248	YJL208C	40194	10	NUC1	NUClease
0.0292085	-1.30223	YMR291W	852630	13	TDA1	Topoisomerase I Damage Affected
0.0419801	-1.30185	YJL034W	381327	10	KAR2	KARyogamy
0.0298946	-1.30154	YMR255W	778001	13	GFD1	Good For Dbp5p
0.0281506	-1.30105	YMR112C	494100	13	MED11	MEDiator complex
0.0427552	-1.30062	YDL058W	345665	4	USO1	yUSOu - transport in Japanese
0.0281506	-1.29942	YDR014W	474046	4	RAD61	RADiation sensitive
0.0166717	-1.29923	YKR037C	510910	11	SPC34	Spindle Pole Component
0.0226807	-1.29886	YER041W	232461	5	YEN1
0.020494	-1.29815	YML115C	40187	13	VAN1	VANadate resistance protein
0.0396328	-1.29682	YPL175W	218630	16	SPT14	SuPpressor of Ty
0.0427534	-1.29245	YDR277C	1014401	4	MTH1	MSN Three Homolog
0.0348114	-1.29201	YOR047C	416347	15	STD1	Suppressor of Tbp Deletion
0.0429867	-1.29092	YDR034C	509737	4	LYS14	LYSine requiring	x
0.0239339	-1.28991	YGL109W	303513	7
0.022437	-1.28926	YIL159W	41825	9	BNR1	BNi1 Related
0.0441511	-1.28814	YAR002W	152257	1	NUP60	NUclear Pore
0.0201589	-1.28717	YML103C	62582	13	NUP188	NUclear Pore
0.0226807	-1.28711	YDR061W	574164	4
0.0243764	-1.28684	YOL028C	270633	15	YAP7	Yeast AP-1
0.0454077	-1.28553	YKL139W	182958	11	CTK1	Carboxy-Terminal domain Kinase
0.0432464	-1.28347	YNL224C	224796	14	SQS1	SQuelch of Splicing suppression
0.0218194	-1.28263	YMR233W	739185	13	TRI1
0.031593	-1.28067	YDL201W	99561	4	TRM8	Transfer RNA Methyltransferase
0.0348114	-1.27953	YDR485C	1424820	4	VPS72	Vacuolar Protein Sorting
0.0272665	-1.2788	YBL052C	119379	2	SAS3	Something About Silencing
0.0235237	-1.27772	YML062C	147505	13	MFT1	Mitochondrial Fusion Targeting
0.0204751	-1.27643	YCR035C	191834	3	RRP43	Ribosomal RNA Processing
0.0440335	-1.27623	YML106W	56773	13	URA5	URAcil requiring
0.0360166	-1.27571	YGL203C	112475	7	KEX1	Killer EXpression defective
0.0290712	-1.27278	YGL095C	328874	7	VPS45	Vacuolar Protein Sorting
0.0183311	-1.27252	YML055W	164790	13	SPC2	Signal Peptidase Complex
0.038211	-1.27025	YLR014C	172268	12	PPR1	Pyrimidine Pathway Regulation
0.01864	-1.26941	YGL004C	490703	7	RPN14	Regulatory Particle Non-ATPase
0.0250709	-1.26928	YGR257C	1006205	7	MTM1	Manganese Trafficking factor for Mitochondrial SOD2
0.0392592	-1.26911	YKR008W	452201	11	RSC4	Remodel the Structure of Chromatin
0.0218194	-1.26909	YNL040W	553380	14
0.0140125	-1.26895	YPL086C	384773	16	ELP3	ELongator Protein
0.0213245	-1.26842	YDR200C	854279	4	VPS64	Vacuolar Protein Sorting
0.0372532	-1.26718	YHR175W-A	453558	8
0.042206	-1.26687	YNL306W	58155	14	MRPS18	Mitochondrial Ribosomal Protein, Small subunit
0.0302222	-1.2663	YPL226W	121767	16	NEW1	Nu+
0.0317634	-1.26563	YML111W	46942	13	BUL2	Binds Ubiquitin Ligase
0.0416085	-1.26343	YIL106W	166415	9	MOB1	Mps One Binder
0.029018	-1.26316	YDR138W	730578	4	HPR1	HyPerRecombination
0.0323267	-1.26266	YKL125W	208247	11	RRN3	Regulation of RNA polymerase I
0.0496529	-1.26088	YNL108C	419014	14
0.0218305	-1.26079	YLR327C	783127	12	TMA10	Translation Machinery Associated
0.0471071	-1.26059	YOR110W	528941	15	TFC7
0.0418013	-1.2596	YOR279C	843698	15	RFM1	Repression Factor of Middle sporulation element
0.032828	-1.25926	YLR015W	175227	12	BRE2	BREfeldin A sensitivity
0.0292085	-1.25827	YFL048C	38843	6	EMP47
0.0498138	-1.25807	YBR164C	567875	2	ARL1	ADP-Ribosylation factor-Like
0.048062	-1.25746	YBL004W	227636	2	UTP20	U Three Protein
0.0441511	-1.25658	YMR151W	562506	13	YIM2
0.0489869	-1.25651	YKL114C	223352	11	APN1	APurinic/apyrimidinic eNdonuclease
0.039966	-1.25542	YDR311W	1085065	4	TFB1	Transcription Factor B
0.0440335	-1.25351	YAL037W	74020	1
0.0454787	-1.25287	YHR196W	491931	8	UTP9	U Three Protein
0.0183311	-1.25182	YDR395W	1263324	4	SXM1	Suppressor of mRNA eXport Mutant
0.0460479	-1.25181	YGL043W	417483	7	DST1	DNA Strand Transfer
0.0453514	-1.25151	YJL097W	245591	10	PHS1	PTPLA Homolog involved in Sphingolipid biosynthesis 1
0.0330256	-1.25011	YNL141W	359596	14	AAH1	Adenine AminoHydrolase	x
0.0388814	-1.24963	YPL118W	326628	16	MRP51	Mitochondrial Ribosomal Protein
0.049219	-1.24959	YPL148C	272294	16	PPT2	Phosphopantetheine:Protein Transferase
0.0382972	-1.24944	YKR022C	482171	11	NTR2	NineTeen complex Related protein
0.0309659	-1.24854	YGL244W	41498	7	RTF1	Restores TBP Function
0.0292085	-1.24837	YMR109W	486587	13	MYO5	MYOsin
0.0235237	-1.24719	YOR269W	826385	15	PAC1	Perish in the Absence of Cin8p
0.0468035	-1.24687	YPL029W	495506	16	SUV3	SUppressor of Var1
0.0241551	-1.24623	YPR190C	917077	16	RPC82	RNA Polymerase C
0.0360166	-1.24481	YBL079W	75259	2	NUP170	NUclear Pore
0.0439139	-1.24297	YOR182C	678191	15	RPS30B	Ribosomal Protein of the Small subunit
0.0430013	-1.24198	YML016C	239458	13	PPZ1	Protein Phosphatase Z
0.0166717	-1.24169	YOR292C	865653	15
0.0318513	-1.24144	YGR083C	644860	7	GCD2	General Control Derepressed
0.0371362	-1.24107	YPL216W	143821	16
0.0339125	-1.24054	YPL049C	462481	16	DIG1	Down-regulator of Invasive Growth
0.031593	-1.24021	YNR037C	695052	14	RSM19	Ribosomal Small subunit of Mitochondria
0.0330869	-1.23942	YOR274W	837674	15	MOD5	tRNA MODification
0.0302623	-1.23908	YHR043C	192805	8	DOG2	DeOxyGlucose
0.0391574	-1.23638	YJL106W	221390	10	IME2	Inducer of MEiosis
0.0377635	-1.23536	YJR080C	580432	10	AIM24	Altered Inheritance rate of Mitochondria
0.0367619	-1.23231	YPL237W	100496	16	SUI3	SUppressor of Initiator codon
0.0336887	-1.23018	YFR016C	177042	6	AIP5	Actin Interacting Protein
0.0364997	-1.22827	YMR079W	424989	13	SEC14	SECretory
0.0348114	-1.22791	YLR257W	658826	12
0.0450279	-1.22778	YBR220C	662995	2
0.0427933	-1.22741	YPL250C	74309	16	ATG41	AuTophaGy related
0.0418016	-1.22727	YFL046W	42815	6	FMP32	Found in Mitochondrial Proteome
0.0416109	-1.22661	YNL005C	621313	14	MRP7	Mitochondrial Ribosomal Protein
0.0427534	-1.22628	YMR055C	386101	13	BUB2	Budding Uninhibited by Benzimidazole
0.0398086	-1.2248	YBL059C-A	110125	2	CMC2	Cx9C Motif-Containing protein
0.029018	-1.22389	YLR101C	342566	12
0.0213245	-1.22286	YIL063C	242761	9	YRB2	Yeast Ran Binder
0.0371362	-1.22168	YFL023W	90986	6	BUD27	BUD site selection
0.0401305	-1.22144	YDL063C	338272	4	SYO1	SYnchronized impOrt or SYmpOrtin
0.0398397	-1.22091	YGL089C	344791	7	MF(ALPHA)2	Mating Factor ALPHA
0.0362477	-1.21999	YDR101C	655686	4	ARX1	Associated with Ribosomal eXport complex
0.0204751	-1.21895	YOR194C	711683	15	TOA1
0.0352184	-1.21679	YDR125C	701397	4	ECM18	ExtraCellular Mutant
0.0303312	-1.216	YBL060W	107932	2	YEL1	Yeast EFA6-Like
0.0316522	-1.21527	YBR131W	497163	2	CCZ1	Calcium Caffeine Zinc sensitivity
0.0467829	-1.21449	YBR097W	436951	2	VPS15	Vacuolar Protein Sorting
0.01864	-1.21412	YLR335W	797430	12	NUP2	NUclear Pore
0.0148721	-1.21374	YDR195W	848599	4	REF2	RNA End Formation
0.0286401	-1.2126	YNL257C	160631	14	SIP3	SNF1-Interacting Protein
0.033678	-1.21223	YER003C	157736	5	PMI40	PhosphoMannose Isomerase
0.0213245	-1.21155	YGL060W	390065	7	YBP2	Yap1-Binding Protein
0.0213245	-1.21144	YER174C	538434	5	GRX4	GlutaRedoXin
0.0418013	-1.21134	YNL051W	532659	14	COG5	Conserved Oligomeric Golgi complex
0.0302222	-1.21091	YMR126C	520761	13	DLT1	Defect at Low Temperature
0.0435661	-1.21016	YBR172C	579150	2	SMY2	Suppressor of MYo2-66
0.0161154	-1.20985	YDR332W	1131001	4	IRC3	Increased Recombination Centers
0.0237164	-1.20978	YPL158C	252034	16	AIM44	Altered Inheritance rate of Mitochondria
0.0340787	-1.20636	YBL059W	110594	2	IAI11	Interactor of AIm11
0.0361386	-1.20599	YGL097W	321782	7	SRM1	Suppressor of Receptor Mutations
0.0213245	-1.20566	YDL206W	90176	4
0.0321912	-1.20401	YDR043C	542674	4	NRG1	Negative Regulator of Glucose-repressed genes
0.0303312	-1.20232	YMR010W	285100	13	ANY1	Antagonizes Neo1 Yeast phospholipid flippase
0.0474695	-1.20149	YLL042C	52087	12	ATG10	AuTophaGy related
0.02363	-1.20094	YKL090W	271878	11	CUE2	Coupling of Ubiquitin conjugation to ER degradation
0.0496332	-1.20091	YDR386W	1246084	4	MUS81	MMS and UV Sensitive
0.0385539	-1.20021	YDR184C	830629	4	ATC1	Aip Three Complex
0.022437	-1.19835	YNL059C	512668	14	ARP5	Actin-Related Protein
0.0376153	-1.19639	YGL099W	314631	7	LSG1	Large-Subunit Gtpase
0.0204751	-1.19621	YKL164C	141794	11	PIR1	Protein containing Internal Repeats
0.0362801	-1.19493	YDR122W	694700	4	KIN1	KINase
0.0318513	-1.1947	YGR028W	542203	7	MSP1	Mitochondrial Sorting of Proteins
0.0204751	-1.194	YKL068W	310199	11	NUP100	NUclear Pore
0.0409612	-1.19331	YPL111W	339944	16	CAR1	Catabolism of ARginine
0.0427552	-1.19245	YJR120W	647126	10
0.0250709	-1.18739	YJR068W	567643	10	RFC2	Replication Factor C
0.0299507	-1.18635	YPL181W	203421	16	CTI6	Cyc8-Tup1 Interacting protein
0.0468035	-1.18621	YGR204C-A	909061	7
0.0485989	-1.18548	YDR318W	1103758	4	MCM21	MiniChromosome Maintenance
0.0294217	-1.1854	YJR152W	719666	10	DAL5	Degradation of Allantoin
0.0376153	-1.18335	YPL272C	26611	16	PBI1	PSTB2 Interacting protein 1
0.0318513	-1.18288	YOR036W	400348	15	PEP12	carboxyPEPtidase Y-deficient
0.0166717	-1.18279	YOR195W	712866	15	SLK19	Synthetic Lethal Kar3p
0.031593	-1.18142	YOL017W	292529	15	ESC8	Establishes Silent Chromatin
0.0475783	-1.18079	YMR023C	319437	13	MSS1	Mitochondrial Splicing System
0.0253761	-1.18051	YJL165C	106894	10	HAL5	HALotolerance
0.0235237	-1.17996	YDR056C	565023	4	EMC10	ER Membrane protein Complex
0.01217	-1.17912	YGR040W	575398	7	KSS1	Kinase Suppressor of Sst2 mutations
0.0363423	-1.17911	YOR205C	725564	15	GEP3	GEnetic interactors of Prohibitins
0.0440335	-1.17877	YDR106W	667004	4	ARP10	Actin-Related Protein
0.0264421	-1.17693	YBR201W	623576	2	DER1	Degradation in the Endoplasmic Reticulum
0.0367467	-1.1764	YIL004C	347946	9	BET1	Blocked Early in Transport
0.0204751	-1.17539	YGR162W	824059	7	TIF4631	Translation Initiation Factor
0.024055	-1.17517	YMR172W	605981	13	HOT1	High-Osmolarity-induced Transcription
0.0166717	-1.17493	YDL216C	68997	4	RRI1	Regulator of Rub1 specific Isopeptidase
0.031593	-1.17376	YLR085C	300673	12	ARP6	Actin-Related Protein
0.0442295	-1.17369	YHR077C	252374	8	NMD2	Nonsense-mediated MRNA Decay
0.0392592	-1.17237	YKR011C	461635	11
0.0149252	-1.17229	YLR016C	176802	12	PML1	Pre-mRNA Leakage
0.048062	-1.17155	YCR077C	250238	3	PAT1	Protein Associated with Topoisomerase II
0.0236931	-1.17141	YOR197W	717086	15	MCA1	MetaCAspase
0.0392592	-1.17096	YBR115C	469748	2	LYS2	LYSine requiring	x
0.019527	-1.17094	YMR199W	662644	13	CLN1	CycLiN
0.0250709	-1.17092	YDL043C	375680	4	PRP11	Pre-mRNA Processing
0.0374876	-1.16948	YNL287W	91994	14	SEC21	SECretory
0.0442295	-1.16915	YNL161W	332597	14	CBK1	Cell wall Biosynthesis Kinase
0.0367619	-1.16906	YNR007C	639182	14	ATG3	AuTophaGy related
0.0423752	-1.16851	YPL042C	473040	16	SSN3	Suppressor of SNf1
0.022437	-1.16301	YHR069C	233579	8	RRP4	Ribosomal RNA Processing
0.0204751	-1.16111	YDR286C	1035231	4	MGP12	Mitochondrial Glutaredoxin-like Protein of 12 kDa
0.0259167	-1.16087	YPL112C	337436	16	PEX25	PEroXisome related
0.0292602	-1.1602	YIR039C	430498	9	YPS6	YaPSin
0.0497501	-1.15881	YLR243W	624203	12	GPN3	Gly-Pro-Asn (N) motif
0.0403502	-1.15845	YJR034W	496683	10	PET191	PETite colonies
0.0415939	-1.15833	YGL246C	37617	7	RAI1	Rat1p Interacting Protein
0.0324779	-1.15822	YGR206W	910432	7	MVB12	MultiVesicular Body sorting factor of 12 kilodaltons
0.0210121	-1.15662	YPL053C	457118	16	KTR6	Kre Two Related
0.0237164	-1.1561	YHR030C	168890	8	SLT2	Suppressor of the LyTic phenotype
0.0276386	-1.15581	YJR091C	595061	10	JSN1	Just Say No
0.045999	-1.15467	YDL099W	283419	4	BUG1	Binder of USO1 and GRH1
0.0243764	-1.15437	YBR107C	453793	2	IML3	Increased Minichromosome Loss
0.0274825	-1.15328	YPL009C	535820	16	RQC2	Ribosome Quality control Complex
0.0423061	-1.15288	YDR517W	1477239	4	GRH1	GRasp65 (Golgi reassembly stacking protein of 65kD) Homolog
0.022437	-1.15211	YMR070W	409154	13	MOT3	Modifier of Transcription
0.0292085	-1.15138	YKR099W	635851	11	BAS1	BASal
0.0244007	-1.15064	YDR398W	1267471	4	UTP5	U Three Protein
0.0243764	-1.15046	YNL193W	274368	14
0.0232921	-1.14995	YJL123C	188004	10	MTC1	Maintenance of Telomere Capping
0.0447504	-1.14951	YHR040W	187924	8	BCD1	Box C/D snoRNA accumulation
0.0344305	-1.14929	YJR072C	570967	10	NPA3	Nucleolar Preribosomal Associated
0.01864	-1.14736	YPL258C	53498	16	THI21	THIamine metabolism	x
0.0440213	-1.14513	YBR014C	266725	2	GRX7	GlutaRedoXin
0.038884	-1.14448	YGR224W	942806	7	AZR1	Acetic Acid and AZoles Resistance
0.0483772	-1.14423	YGR013W	514554	7	SNU71	Small NUclear ribonucleoprotein associated
0.0344645	-1.14358	YAR003W	155005	1	SWD1	Set1c, WD40 repeat protein
0.031593	-1.14128	YKR021W	479234	11	ALY1	Arrestin-Like Yeast protein
0.0408048	-1.14112	YBR154C	548362	2	RPB5	RNA Polymerase B
0.0204751	-1.14012	YLR052W	247201	12	IES3	Ino Eighty Subunit
0.0338949	-1.13812	YER145C	460526	5	FTR1	Fe TRansporter
0.0204751	-1.13759	YOR083W	479533	15	WHI5	WHIskey
0.0299507	-1.13697	YNL273W	122883	14	TOF1	TOpoisomerase I-interacting Factor
0.0398397	-1.13617	YML130C	11483	13	ERO1	ER Oxidation or Endoplasmic Reticulum Oxidoreductin
0.0204751	-1.13579	YLR105C	347047	12	SEN2	Splicing ENdonuclease
0.0493128	-1.13505	YPL260W	49303	16	CUB1	Cu2+ suppressing and Bleomycin sensitive
0.0204751	-1.13434	YKR020W	478338	11	VPS51	Vacuolar Protein Sorting
0.0194682	-1.13328	YDR304C	1071880	4	CPR5	Cyclosporin-sensitive Proline Rotamase
0.031237	-1.13302	YPR127W	790083	16
0.0386084	-1.13173	YDR091C	626708	4	RLI1	RNase L Inhibitor
0.0325109	-1.12933	YGL135W	254641	7	RPL1B	Ribosomal Protein of the Large subunit
0.0204751	-1.12901	YOR004W	333592	15	UTP23	U Three-associated Protein
0.0423061	-1.1284	YHR076W	251101	8	PTC7	Phosphatase type Two C
0.0344305	-1.12811	YBR055C	344602	2	PRP6	Pre-mRNA Processing
0.0372553	-1.12807	YOL090W	147382	15	MSH2	MutS Homolog
0.031593	-1.12736	YPR066W	681213	16	UBA3	UBiquitin-like protein-Activating enzyme
0.0336887	-1.12681	YCR042C	201174	3	TAF2	TATA binding protein-Associated Factor
0.0381955	-1.12641	YDR080W	604008	4	VPS41	Vacuolar Protein Sorting
0.0235237	-1.12623	YNL099C	438567	14	OCA1	Oxidant-induced Cell-cycle Arrest
0.0334921	-1.12595	YCR052W	214994	3	RSC6	Remodel the Structure of Chromatin
0.0396328	-1.12581	YBR095C	434406	2	RXT2
0.0293419	-1.12449	YDR139C	733618	4	RUB1	Related to UBiquitin
0.0364997	-1.12293	YCR017C	144773	3	CWH43	Calcofluor White Hypersensitive
0.0316522	-1.12124	YGL022W	452404	7	STT3	STaurosporine and Temperature sensitive
0.00519966	-1.11986	YPL035C	486564	16
0.0465636	-1.11781	YOR273C	834452	15	TPO4	Transporter of POlyamines
0.0267986	-1.11691	YJR059W	545787	10	PTK2	Putative serine/Threonine protein Kinase
0.0338554	-1.11367	YJR009C	453683	10	TDH2	Triose-phosphate DeHydrogenase
0.0388715	-1.11364	YNL258C	158109	14	DSL1	Dependence on SLy1-20
0.0423061	-1.11337	YDR460W	1383811	4	TFB3	Transcription Factor B subunit 3
0.0489758	-1.11211	YDL093W	289909	4	PMT5	Protein O-MannosylTransferase
0.0496038	-1.1116	YGL127C	270392	7	SOH1	Suppressor Of Hpr1
0.0475783	-1.1111	YBR279W	761257	2	PAF1	RNA Polymerase II Associated Factor
0.0299629	-1.11016	YKL081W	282891	11	TEF4	Translation Elongation Factor
0.0404126	-1.11011	YER018C	191959	5	SPC25	Spindle Pole Component
0.0342254	-1.10981	YER098W	355466	5	UBP9	UBiquitin-specific Protease
0.024055	-1.10713	YDL092W	292781	4	SRP14	Signal Recognition Particle
0.0295002	-1.10651	YMR244W	757250	13
0.0344305	-1.10649	YGR002C	498476	7	SWC4	SWr Complex
0.0359889	-1.1054	YJR060W	548759	10	CBF1	Centromere Binding Factor
0.0338949	-1.10394	YGR220C	936074	7	MRPL9	Mitochondrial Ribosomal Protein, Large subunit
0.031593	-1.10284	YJL130C	165723	10	URA2	URAcil requiring
0.0491629	-1.10238	YGR097W	678695	7	ASK10	Activator of SKn7
0.0318513	-1.09956	YGR134W	757770	7	CAF130	CCR4 Associated Factor
0.0352566	-1.09824	YKR019C	476216	11	IRS4	Increased rDNA Silencing
0.042225	-1.09786	YGL092W	337906	7	NUP145	NUclear Pore
0.0204751	-1.09699	YDR058C	567723	4	TGL2	TriacylGlycerol Lipase
0.0286401	-1.09666	YPR118W	767752	16	MRI1	MethylthioRibose-1-phosphate Isomerase
0.0488867	-1.09335	YDL076C	320668	4	RXT3
0.0375016	-1.09309	YDR383C	1239960	4	NKP1	Non-essential Kinetochore Protein
0.0359889	-1.09291	YPL096W	366927	16	PNG1	Peptide N-Glycanase
0.0308748	-1.09277	YMR075W	413982	13	RCO1
0.0497257	-1.09072	YPR055W	667676	16	SEC8	SECretory
0.032415	-1.08733	YJR014W	461829	10	TMA22	Translation Machinery Associated
0.0460479	-1.08701	YDL045C	372688	4	FAD1	FAD synthetase
0.0204751	-1.08653	YMR213W	693381	13	CEF1	CErevisiae homolog of cdc Five
0.024055	-1.08589	YDR137W	728259	4	RGP1	Reduced Growth Phenotype
0.031593	-1.08587	YPL193W	181403	16	RSA1	RiboSome Assembly
0.0272665	-1.08489	YNL062C	508776	14	GCD10	General Control Derepressed
0.0318513	-1.08428	YCR082W	258883	3	AHC2	Ada Histone acetyltransferase complex Component
0.038859	-1.08364	YCR102C	304361	3
0.0396426	-1.08316	YMR004W	274017	13	MVP1	Multi-copy suppressor of vps1
0.0302222	-1.08298	YFL010W-A	114990	6	AUA1	Amino acid Uptake Activation	x
0.0306138	-1.08259	YFR022W	196833	6	ROG3	Revertant Of Glycogen synthase kinase mutation
0.0374876	-1.08171	YOR020C	370524	15	HSP10	Heat Shock Protein
0.0485187	-1.08139	YGR215W	922175	7	RSM27	Ribosomal Small subunit of Mitochondria
0.0437236	-1.0801	YEL052W	56571	5	AFG1	ATPase Family Gene
0.0380287	-1.07762	YHR119W	346043	8	SET1	SET domain-containing
0.0234559	-1.07557	YGL233W	59122	7	SEC15	SECretory
0.0318513	-1.07557	YER153C	474041	5	PET122	PETite colonies
0.0290552	-1.07542	YOR121C	551798	15
0.0204751	-1.07496	YKR002W	443232	11	PAP1	Poly(A) Polymerase
0.0319838	-1.07416	YJL003W	432644	10	COX16	Cytochrome c OXidase
0.0375016	-1.07403	YMR149W	560996	13	SWP1	Suppressor of a WbP1 mutation
0.0255478	-1.07399	YLR173W	502421	12
0.0272665	-1.07372	YMR178W	618479	13	FPY1	FAD PYrophosphatase
0.0415939	-1.07193	YDR078C	602198	4	SHU2	Suppressor of HydroxyUrea sensitivity
0.0302623	-1.06922	YDR130C	715747	4	FIN1	Filaments In between Nuclei
0.0204751	-1.0683	YJL051W	339787	10	IRC8	Increased Recombination Centers
0.043871	-1.06493	YOR355W	1005137	15	GDS1
0.0437661	-1.06195	YDR396W	1266295	4
0.0368677	-1.06157	YNL295W	76946	14	MRX6	Mitochondrial oRganization of gene eXpression (MIOREX)
0.0362221	-1.06063	YJL168C	102227	10	SET2	SET domain-containing
0.0312572	-1.0582	YPR163C	868645	16	TIF3	Translation Initiation Factor
0.0367619	-1.05791	YPR008W	573018	16	HAA1	Homolog of Ace1 Activator
0.0255552	-1.0576	YNL148C	349907	14	ALF1	ALpha tubulin Folding
0.0250709	-1.05606	YIL005W	345692	9	EPS1	ER-retained Pma1 Suppressing
0.0367619	-1.05373	YDR331W	1129588	4	GPI8	GlycosylPhosphatidylInositol anchor biosynthesis
0.0218194	-1.05315	YKL166C	134509	11	TPK3	Takashi's Protein Kinase
0.0329452	-1.05243	YNL136W	370368	14	EAF7	Esa1-Associated Factor
0.024055	-1.05152	YHR103W	320414	8	SBE22	similar to SBE2
0.0218194	-1.05122	YMR240C	749930	13	CUS1	Cold sensitive U2 snRNA Suppressor
0.0244007	-1.04997	YPR072W	690107	16	NOT5	Negative On TATA
0.0479157	-1.04755	YLR323C	778173	12	CWC24	Complexed With Cef1p
0.0201589	-1.04673	YFL009W	116145	6	CDC4	Cell Division Cycle
0.0447504	-1.04522	YLR293C	720771	12	GSP1	Genetic Suppressor of Prp20-1
0.038603	-1.04475	YDL128W	232652	4	VCX1	VaCuolar H+/Ca2+ eXchanger
0.0201589	-1.04287	YIL027C	303679	9	EMC5	ER Membrane protein Complex
0.0323915	-1.04087	YOR307C	892731	15	SLY41	Suppressor of Loss of Ypt1
0.043292	-1.03984	YHL022C	62961	8	SPO11	SPOrulation
0.0292085	-1.0384	YNL097C	441366	14	PHO23	PHOsphate metabolism
0.0272665	-1.03814	YMR273C	811233	13	ZDS1	Zillion Different Screens
0.0491629	-1.03656	YER087C-B	332582	5	SBH1	Sec61 beta homolog 1
0.0403502	-1.03564	YBR015C	267710	2	MNN2	MaNNosyltransferase
0.0290552	-1.03287	YOR176W	662401	15	HEM15	HEMe biosynthesis
0.0482063	-1.03002	YCR020C	154012	3	PET18	PETite colonies
0.0321282	-1.02883	YMR200W	664752	13	ROT1	Reversal Of Tor2 lethality
0.0250709	-1.02771	YNL238W	202428	14	KEX2	Killer EXpression defective
0.0156341	-1.02703	YHR034C	176965	8	PIH1	Protein Interacting with Hsp90
0.0468035	-1.02637	YLR045C	235037	12	STU2	Suppressor of TUbulin
0.0483772	-1.02595	YBR204C	632254	2	LDH1	Lipid Droplet Hydrolase
0.031593	-1.02422	YDR381W	1236558	4	YRA1	Yeast RNA Annealing protein
0.0376153	-1.01807	YER104W	366802	5	RTT105	Regulator of Ty1 Transposition
0.0292085	-1.01799	YIR005W	364889	9	IST3	Increased Sodium Tolerance
0.0440335	-1.01652	YER133W	432495	5	GLC7	GLyCogen
0.0292085	-1.01425	YKL152C	163642	11	GPM1	Glycerate PhosphoMutase
0.0183311	-1.01328	YHR157W	412907	8	REC104	RECombination
0.0238823	-1.01151	YLR381W	879723	12	CTF3	Chromosome Transmission Fidelity
0.00584368	-1.01099	YIL050W	258913	9	PCL7	Pho85 CycLin
0.0231741	-1.01081	YJL044C	358300	10	GYP6	Gtpase-activating protein of Ypt6 Protein
0.029726	-1.00978	YOR076C	469377	15	SKI7	SuperKIller
0.0321912	-1.00966	YJR066W	559416	10	TOR1	Target Of Rapamycin
0.0431872	-1.00918	YDR523C	1485566	4	SPS1	SPorulation Specific
0.0375016	-1.00626	YJL091C	261080	10	GWT1	GPI-anchored Wall protein Transfer
0.0386084	-1.0055	YOR148C	608640	15	SPP2	Suppressor of PrP
0.0204751	-1.00459	YKL067W	314812	11	YNK1	Yeast Nucleoside diphosphate Kinase
0.0396328	-1.00392	YER155C	476345	5	BEM2	Bud EMergence
0.0344305	-1.00256	YMR313C	899379	13	TGL3	TriacylGlycerol Lipase
0.0392592	-1.00249	YDR522C	1483795	4	SPS2	SPorulation Specific
0.038211	-1.00214	YML085C	97941	13	TUB1	TUBulin
0.0414672	-1.00207	YHR111W	333072	8	UBA4	UBiquitin-Activating
0.0343442	-1.00204	YGR047C	586392	7	TFC4	Transcription Factor class C
0.0398086	-0.999159	YPR165W	875368	16	RHO1	Ras HOmolog
0.0471071	-0.998877	YDR423C	1318046	4	CAD1	CADmium resistance
0.043292	-0.998121	YBR237W	691969	2	PRP5	Pre-mRNA Processing
0.0218194	-0.997112	YGL047W	411552	7	ALG13	Asparagine-Linked Glycosylation
0.0329989	-0.993555	YNR006W	636986	14	VPS27	Vacuolar Protein Sorting
0.029018	-0.992706	YMR064W	397903	13	AEP1	ATPase ExPression
0.019527	-0.991989	YLR403W	925568	12	SFP1	Split Finger Protein
0.0243764	-0.990318	YDL188C	123865	4	PPH22	Protein PHosphatase
0.01864	-0.990232	YPL010W	535018	16	RET3	RETrieval from ER
0.0271878	-0.98626	YHR033W	175548	8
0.0391935	-0.985139	YOR015W	359993	15
0.0473282	-0.985028	YLR426W	987062	12	TDA5	Topoisomerase I Damage Affected
0.0241551	-0.984729	YPL244C	87014	16	HUT1	Homolog of UDP-galactose Transporter
0.0496332	-0.982494	YOR018W	364369	15	ROD1	Resistance to O-Dinitrobenzene
0.022437	-0.98145	YDR421W	1312040	4	ARO80	AROmatic amino acid requiring	x
0.0302222	-0.979481	YNL102W	430087	14	POL1	POLymerase
0.031593	-0.979406	YLL063C	14648	12	AYT1	AcetYlTransferase
0.026133	-0.978701	YAL023C	106272	1	PMT2	Protein O-MannosylTransferase
0.0264622	-0.9786	YPR022C	603911	16	SDD4	Suppressor of Degenerative Death
0.0357536	-0.978362	YDL116W	251566	4	NUP84	NUclear Pore
0.047062	-0.976774	YNL243W	188051	14	SLA2	Synthetic Lethal with ABP1
0.0204751	-0.975671	YNL066W	501515	14	SUN4	Sim1 Uth1 Nca3
0.0302222	-0.975163	YIL043C	274072	9	CBR1	Cytochrome b Reductase
0.0271878	-0.973311	YGR058W	606136	7	PEF1	Penta-EF-Hand protein
0.0109307	-0.971937	YKL133C	191679	11	RCI50	Respiratory Chain Interacting protein of ~50 kDa
0.0340973	-0.970263	YMR242C	753225	13	RPL20A	Ribosomal Protein of the Large subunit
0.0377635	-0.970052	YOR209C	736437	15	NPT1	Nicotinate PhosphoribosylTransferase
0.0288829	-0.96971	YLR298C	724721	12	YHC1	Yeast Homolog of human U1C
0.0286401	-0.968414	YKL021C	397344	11	MAK11	MAintenance of Killer
0.0385539	-0.968076	YDR199W	854175	4
0.0226807	-0.966722	YPR148C	826833	16
0.040178	-0.966405	YNL180C	299654	14	RHO5	Ras HOmolog
0.0204751	-0.966178	YGR029W	543553	7	ERV1	Essential for Respiration and Viability
0.0496332	-0.964375	YJL074C	299157	10	SMC3	Stability of MiniChromosomes
0.0469736	-0.963529	YKL088W	275283	11	CAB3	Coenzyme A Biosynthesis
0.0201589	-0.961118	YIL140W	85366	9	AXL2	AXiaL 2 bud site selection
0.0253761	-0.961096	YHR206W	512732	8	SKN7	Suppressor of Kre Null
0.0330256	-0.961006	YLR077W	283872	12	FMP25	Found in Mitochondrial Proteome
0.0348114	-0.960611	YLR100W	341810	12	ERG27	ERGosterol biosynthesis
0.0482063	-0.959739	YDL138W	213351	4	RGT2	Restores Glucose Transport
0.0367467	-0.95918	YMR258C	782620	13	ROY1	Repressor Of Ypt52
0.0482063	-0.958261	YML046W	181474	13	PRP39	Pre-mRNA Processing
0.0497368	-0.957918	YGR112W	717358	7	SHY1	SURF Homolog of Yeast
0.0392592	-0.956248	YLR074C	281956	12	BUD20	BUD site selection
0.022437	-0.954454	YDL131W	227393	4	LYS21	LYSine	x
0.00215829	-0.954085	YOR163W	642741	15	DDP1	Diadenosine and Diphosphoinositol Polyphosphate phosphohydrolase
0.0272665	-0.95406	YPR188C	911988	16	MLC2	Myo1p Light Chain
0.0460479	-0.953608	YIL112W	151595	9	HOS4	Hda One Similar
0.022437	-0.952711	YEL042W	73771	5	GDA1	Guanosine DiphosphatAse
0.0420463	-0.951157	YOR223W	759782	15	DSC3	Defective for SREBP Cleavage
0.0318513	-0.950679	YBR057C	352193	2	MUM2	MUddled Meiosis
0.0241551	-0.950235	YBR090C	426333	2
0.0361386	-0.947619	YOR066W	449436	15	MSA1	Mbf and Sbf Associated
0.0392592	-0.946404	YNL077W	481391	14	APJ1	Anti-Prion DnaJ
0.0292085	-0.942425	YNL157W	340352	14	IGO1	Initiation of G zerO
0.0335571	-0.94235	YGL038C	425362	7	OCH1	Outer CHain elongation
0.0322369	-0.941678	YPR045C	655140	16	THP3	THO-related Protein
0.0204751	-0.940517	YHR006W	117814	8	STP2	protein with similarity to Stp1p
0.0290552	-0.940148	YNL068C	495701	14	FKH2	ForK head Homolog
0.0297186	-0.939853	YKR003W	445381	11	OSH6	OxySterol binding protein Homolog
0.022437	-0.934294	YCR037C	194414	3	PHO87	PHOsphate metabolism
0.0204751	-0.933399	YDR539W	1512094	4	FDC1	Ferulic acid DeCarboxylase
0.0290552	-0.933266	YMR187C	634689	13
0.0391914	-0.932615	YFR019W	184502	6	FAB1	Forms Aploid and Binucleate cells
0.0407793	-0.930162	YJR031C	486586	10	GEA1	Guanine nucleotide Exchange on ARF
0.0497556	-0.929636	YJR078W	578860	10	BNA2	Biosynthesis of Nicotinic Acid
0.0123016	-0.926228	YDR454C	1366264	4	GUK1	GUanylate Kinase
0.0442295	-0.925527	YBR239C	698354	2	ERT1	Ethanol Regulated Transcription factor
0.0303312	-0.924643	YIL034C	289226	9	CAP2	CAPping
0.0204751	-0.923499	YDR092W	629876	4	UBC13	UBiquitin-Conjugating
0.0348078	-0.923297	YML125C	20761	13	PGA3	Processing of Gas1p and ALP
0.0286401	-0.922056	YOR005C	334509	15	DNL4	DNA Ligase
0.0471467	-0.910324	YKR032W	506517	11
0.0370096	-0.906033	YOR186W	683111	15
0.0204751	-0.905961	YPL140C	287514	16	MKK2	Mitogen-activated Kinase Kinase
0.0402212	-0.903647	YER173W	536300	5	RAD24	RADiation sensitive
0.0491831	-0.901238	YOL116W	99809	15	MSN1	Multicopy suppressor of SNF1 mutation
0.022437	-0.901153	YJR126C	656254	10	VPS70	Vacuolar Protein Sorting
0.043292	-0.900486	YER011W	175248	5	TIR1	TIp1-Related
0.0334921	-0.900077	YNL311C	49397	14	SKP2	homology with human SKP2
0.0262631	-0.897801	YKL204W	53704	11	EAP1	EIF4E-Associated Protein
0.022437	-0.897318	YGL247W	36933	7	BRR6	Bad Response to Refrigeration
0.037948	-0.896086	YJL139C	151713	10	YUR1	Yeast Unknown Reading frame
0.0204751	-0.896035	YNL047C	539911	14	SLM2	Synthetic Lethal with Mss4
0.0225375	-0.894267	YFL024C	87847	6	EPL1	Enhancer of Polycomb Like
0.0348114	-0.893927	YER164W	505392	5	CHD1	Chromatin organization modifier, Helicase, and DNA-binding domains
0.0267986	-0.893339	YBR151W	545028	2	APD1	Actin Patches Distal
0.0302222	-0.891385	YLR214W	568567	12	FRE1	Ferric REductase
0.0403175	-0.891063	YGR235C	961360	7	MIC26	MItochondrial contact site and Cristae organizing system
0.042313	-0.890855	YHR091C	284839	8	MSR1	Mitochondrial tRNA Synthetase aRginine
0.0453267	-0.890782	YML013W	244149	13	UBX2	UBiquitin regulatory X
0.0276386	-0.890419	YOR368W	1026843	15	RAD17	RADiation sensitive
0.0436216	-0.8902	YBL038W	146187	2	MRPL16	Mitochondrial Ribosomal Protein, Large subunit
0.0419092	-0.8894	YDL100C	282112	4	GET3	Guided Entry of Tail-anchored proteins
0.0256169	-0.888584	YJL085W	272827	10	EXO70	EXOcyst
0.0303312	-0.887953	YDR236C	935236	4	FMN1	FMN biosynthesis
0.0382972	-0.885859	YDL108W	267698	4	KIN28	protein KINase
0.0302222	-0.884455	YHR181W	467228	8	SVP26	Sed5 Vesicle Protein
0.00575176	-0.88392	YBR263W	736264	2	SHM1	Serine HydroxyMethyltransferase
0.0267986	-0.882525	YBR192W	607652	2	RIM2	Replication In Mitochondria
0.0496529	-0.8813	YOL138C	61325	15	RTC1	Restriction of Telomere Capping
0.0404695	-0.881134	YNL144C	352820	14
0.0204751	-0.881029	YPL270W	30482	16	MDL2	MultiDrug resistance-Like
0.0209598	-0.879993	YMR226C	721593	13
0.0392592	-0.8759	YLR001C	151389	12
0.0292602	-0.875063	YAL029C	87855	1	MYO4	MYOsin
0.0319838	-0.874975	YIR003W	360885	9	AIM21	Altered Inheritance rate of Mitochondria
0.0488101	-0.874135	YNL103W	427735	14	MET4	METhionine requiring	x
0.0123016	-0.873371	YPR171W	883828	16	BSP1	Binding protein of Synaptojanin Polyphosphoinositide phosphatase domain
0.031593	-0.871219	YKL023W	393721	11	SKA1	SKi Associated factor
0.0437661	-0.866088	YLL050C	39804	12	COF1	COFilin
0.0204751	-0.863119	YHR049W	206462	8	FSH1	Family of Serine Hydrolases
0.0442921	-0.861453	YOR039W	405768	15	CKB2	Casein Kinase Beta' subunit
0.0493128	-0.859131	YLR229C	604212	12	CDC42	Cell Division Cycle
0.0326798	-0.858722	YOR275C	839084	15	RIM20	Regulator of IME2
0.0420977	-0.856369	YPL045W	467260	16	VPS16	Vacuolar Protein Sorting
0.0338949	-0.856044	YLR259C	663284	12	HSP60	Heat Shock Protein
0.0348114	-0.854286	YKR077W	583653	11	MSA2	Mbf and Sbf Associated
0.0482063	-0.853341	YKR029C	497578	11	SET3	SET domain-containing
0.0236026	-0.852519	YHL002W		8	HSE1	Has Symptoms of class E mutants
0.0226807	-0.850616	YGR152C	794674	7	RSR1	RaS-Related
0.0348078	-0.849719	YOR357C	1009224	15	SNX3	Sorting NeXin
0.031593	-0.849291	YJL112W	205305	10	MDV1	Mitochondrial DiVision
0.0407793	-0.843839	YGR067C	622372	7
0.01864	-0.840754	YHR105W	324766	8	YPT35
0.026133	-0.840687	YHR115C	340109	8	DMA1	Defective in Mitotic Arrest
0.0470362	-0.840247	YBR125C	487199	2	PTC4	Phosphatase Two C
0.0374876	-0.839119	YMR259C	784621	13	TRM732	Transfer RNA Methyltransferase
0.040178	-0.838854	YEL065W	27657	5	SIT1	Siderophore Iron Transport
0.0423061	-0.835802	YGL075C	366925	7	MPS2	MonoPolar Spindle
0.0358876	-0.834997	YBL057C	112801	2	PTH2	Peptidyl-Trna Hydrolase
0.0338949	-0.834546	YOR232W	774573	15	MGE1	Mitochondrial GrpE
0.0292085	-0.834231	YMR113W	494999	13	FOL3	FOLic acid synthesis
0.0322217	-0.834132	YKL205W	50051	11	LOS1	Loss Of Suppression
0.0457509	-0.832808	YOR246C	795801	15	ENV9	late ENdosome and Vacuole interface function
0.0248473	-0.832647	YPR111W	747306	16	DBF20	DumbBell Forming
0.0319838	-0.831851	YNL020C	595623	14	ARK1	Actin Regulating Kinase
0.0391574	-0.831274	YNL259C	157644	14	ATX1	AnTioXidant
0.0217099	-0.830131	YDR152W	765706	4	GIR2	Genetically Interacts with Ribosomal genes
0.0497257	-0.829267	YJR051W	529861	10	OSM1	OSMotic sensitivity
0.0218194	-0.825744	YFR006W	156145	6
0.0423249	-0.825152	YML034W	209525	13	SRC1	Spliced mRNA and Cell cycle regulated gene
0.0123016	-0.824248	YIL084C	202276	9	SDS3	Suppressor of Defective Silencing
0.0367233	-0.823608	YDL115C	253995	4	IWR1	Interacts With RNA polymerase II
0.0204751	-0.819538	YPR086W	710101	16	SUA7	Suppressor of Upstream AUG
0.0348114	-0.819251	YBR110W	458872	2	ALG1	Asparagine-Linked Glycosylation
0.0302222	-0.818378	YML051W	171594	13	GAL80	GALactose metabolism
0.0367467	-0.818225	YKR044W	522015	11	UIP5	Ulp1 Interacting Protein
0.0166717	-0.818119	YDR060W	570649	4	MAK21	MAintenance of Killer
0.0392592	-0.817323	YGR181W	858287	7	TIM13	Translocase of the Inner Mitochondrial membrane
0.0420338	-0.816782	YDR390C	1254937	4	UBA2	UBiquitin Activating
0.0218194	-0.816229	YHR149C	394455	8	SKG6	Suppressor of lethality of Kex2 Gas1 double null mutant
0.0474695	-0.815953	YDL193W	114672	4	NUS1	Nuclear Undecaprenyl pyrophosphate Synthase
0.0245978	-0.813569	YJL164C	109966	10	TPK1	Takashi's Protein Kinase
0.0248669	-0.812936	YMR026C	324236	13	PEX12	PEroXin
0.0292085	-0.812395	YCL017C	92777	3	NFS1	NiFS-like
0.0456514	-0.812352	YNL149C	349367	14	PGA2	Processing of Gas1p and ALP
0.0457948	-0.812114	YDR005C	456836	4	MAF1
0.0471715	-0.811745	YHL039W	21783	8	EFM1	Elongation Factor Methyltransferase
0.0243764	-0.809948	YBR273C	748061	2	UBX7	UBiquitin regulatory X
0.0469736	-0.807984	YOL062C	210520	15	APM4	clathrin Adaptor Protein complex Medium chain
0.0204751	-0.807963	YNL078W	479768	14	NIS1	Neck protein Interacting with Septins
0.0414672	-0.807793	YBL105C	14241	2	PKC1	Protein Kinase C
0.0463256	-0.806022	YER086W	328477	5	ILV1	IsoLeucine-plus-Valine requiring	x
0.0425153	-0.804375	YOL109W	110297	15	ZEO1	ZEOcin resistance
0.0453403	-0.802889	YOR262W	817292	15	GPN2	Gly-Pro-Asn (N) motif
0.024055	-0.8023	YDR313C	1089219	4	PIB1	PhosphatidylInositol(3)-phosphate Binding
0.0392592	-0.79792	YNL216W	241689	14	RAP1	Repressor/Activator site binding Protein
0.0246236	-0.797667	YCL016C	94621	3	DCC1	Defective in sister Chromatid Cohesion
0.022437	-0.795458	YMR030W	330793	13	RSF1	ReSpiration Factor
0.0368677	-0.794515	YOR250C	800970	15	CLP1	CLeavage/Polyadenylation factor Ia subunit
0.0486684	-0.794335	YLR207W	556788	12	HRD3	HMG-coA Reductase Degradation
0.0497556	-0.794181	YCR098C	297049	3	GIT1	GlycerophosphoInosiTol
0.0396328	-0.793927	YMR108W	484084	13	ILV2	IsoLeucine-plus-Valine requiring	x
0.0204751	-0.790868	YDL090C	295034	4	RAM1	RAS protein and A-factor Maturation
0.0296022	-0.790799	YER032W	215063	5	FIR1	Factor Interacting with REF2
0.0232823	-0.790506	YJL083W	278841	10	TAX4
0.0250306	-0.790497	YMR106C	478301	13	YKU80	Yeast KU protein
0.0322217	-0.787186	YDR339C	1149951	4	FCF1	Faf1p Copurifying Factor
0.0330869	-0.78658	YHR120W	349574	8	MSH1	MutS Homolog
0.0391955	-0.783498	YLR007W	164392	12	NSE1	Non-SMC Element
0.0362221	-0.783406	YBR186W	600553	2	PCH2	Pachytene CHeckpoint
0.0338949	-0.782978	YKR061W	557677	11	KTR2	Kre Two Related
0.0468156	-0.782111	YER159C	491530	5	BUR6	Bypass UAS Requirement
0.0359889	-0.779911	YOR057W	432186	15	SGT1	Suppressor of G2 (Two) allele of skp1
0.0427933	-0.778707	YBR077C	391805	2	SLM4	Synthetic Lethal with Mss4
0.0391574	-0.777657	YER047C	243810	5	SAP1	Sin1 Associated Protein
0.0453403	-0.776314	YBR021W	281443	2	FUR4	5-FlUoRouridine sensitivity
0.0237164	-0.772964	YML121W	26930	13	GTR1	GTp binding protein Resemblance
0.0424348	-0.772267	YOR067C	451729	15	ALG8	Asparagine-Linked Glycosylation
0.0201589	-0.771524	YPL054W	455759	16	LEE1
0.0378716	-0.768814	YDL048C	366739	4	STP4	protein with similarity to Stp1p
0.0374876	-0.768208	YIL085C	200490	9	KTR7	Kre Two Related
0.0382972	-0.766808	YGL079W	359444	7	KXD1	KxDL homolog
0.0338173	-0.765493	YJL126W	184501	10	NIT2	NITrilase superfamily
0.0243764	-0.762699	YGL106W	306560	7	MLC1	Myosin Light Chain
0.0204751	-0.761967	YMR180C	622251	13	CTL1	Capping enzyme mRNA Triphosphatase-Like
0.029018	-0.760303	YJL065C	315054	10	DLS1	Dpb3-Like Subunit of ISW2/yCHRAC complex
0.0298946	-0.757811	YMR236W	742971	13	TAF9	TATA binding protein-Associated Factor
0.0474695	-0.756896	YGR209C	912913	7	TRX2	ThioRedoXin
0.0442295	-0.755796	YCR047C	210718	3	BUD23	BUD site selection
0.045999	-0.755733	YLR451W	1036093	12	LEU3	LEUcine biosynthesis	x
0.0489869	-0.754816	YPR134W	798051	16	MSS18	Mitochondrial Splicing System
0.00739511	-0.754308	YMR247W-A	769283	13
0.0427633	-0.751076	YPL048W	464401	16	CAM1	Calcium And Membrane-binding protein
0.0490392	-0.751033	YNL118C	402652	14	DCP2	mRNA DeCaPping
0.0462958	-0.750736	YGR070W	627806	7	ROM1	RhO1 Multicopy suppressor
0.0479067	-0.744888	YLR241W	620473	12	CSC1	Calcium permeable Stress-gated cation Channel
0.0446166	-0.743683	YGL112C	298178	7	TAF6	TATA binding protein-Associated Factor
0.0377635	-0.74217	YLR427W	988428	12	MAG2
0.0204751	-0.741294	YER105C	367838	5	NUP157	NUclear Pore
0.0263061	-0.740367	YJR112W-A	637790	10
0.0359889	-0.739172	YPR115W	754877	16	RGC1	Regulator of the Glycerol Channel
0.0407793	-0.738891	YNR034W	690321	14	SOL1	Suppressor Of Los1-1
0.0496529	-0.736034	YNR039C	697614	14	ZRG17	Zinc Regulated Gene
0.0483772	-0.733172	YMR270C	805326	13	RRN9	Regulation of RNA polymerase I
0.0419801	-0.73304	YPL239W	99484	16	YAR1	Yeast Ankyrin Repeat
0.0292085	-0.732903	YPL069C	422885	16	BTS1	Bet Two Suppressor
0.0359889	-0.731895	YKR053C	534067	11	YSR3	Yeast Sphingolipid Resistance
0.0402212	-0.731572	YDR285W	1032436	4	ZIP1	molecular ZIPper
0.0235237	-0.729745	YLR233C	607425	12	EST1	Ever Shorter Telomeres
0.0360166	-0.72967	YPL047W	465962	16	SGF11	SaGa associated Factor 11kDa
0.0385539	-0.723346	YGL211W	92512	7	NCS6	Needs Cla4 to Survive
0.0375007	-0.72114	YLR163C	491866	12	MAS1	Mitochondrial ASsembly
0.0440335	-0.720856	YER052C	256375	5	HOM3	HOMoserine requiring
0.0442295	-0.720014	YKL070W	306211	11
0.0243764	-0.717884	YMR315W	902800	13
0.0325197	-0.717569	YKR087C	603195	11	OMA1	Overlapping activity with M-AAA protease
0.0414061	-0.716403	YIR018C-A	385564	9
0.0341712	-0.716293	YOR127W	561170	15	RGA1	Rho GTPase Activating Protein
0.043292	-0.715117	YAL032C	83335	1	PRP45	Pre-mRNA Processing
0.0423752	-0.714402	YBL029W	166134	2
0.0213245	-0.71142	YLR262C-A	669468	12	TMA7	Translation Machinery Associated
0.0303312	-0.705539	YGL222C	80659	7	EDC1	Enhancer of mRNA DeCapping
0.0432464	-0.704468	YMR071C	410762	13	TVP18	Tlg2-Vesicle Protein
0.0269678	-0.703938	YLR248W	634252	12	RCK2	Radiation sensitivity Complementing Kinase
0.0425544	-0.699502	YLR231C	605758	12	BNA5	Biosynthesis of Nicotinic Acid
0.039966	-0.696458	YLR246W	627118	12	ERF2	Effect on Ras Function
0.0392592	-0.692986	YCR036W	193297	3	RBK1	RiBoKinase
0.0359889	-0.688817	YPR138C	810984	16	MEP3
0.0204751	-0.687535	YDR320C	1106095	4	SWA2	Synthetic lethal With Arf1
0.0281506	-0.68312	YAL003W	142174	1	EFB1	Elongation Factor Beta
0.0437637	-0.681735	YJR015W	462721	10
0.0204751	-0.679064	YKL071W	305114	11
0.0446678	-0.67744	YOR219C	752214	15	STE13	STErile
0.0319838	-0.673343	YIL157C	46949	9	COA1	Cytochrome Oxidase Assembly
0.0496332	-0.673209	YOR175C	659815	15	ALE1	Acyltransferase for Lyso-phosphatidylEthanolamine
0.0271878	-0.669607	YGR133W	756896	7	PEX4	PEroXin
0.0430075	-0.669298	YPL005W	548486	16	AEP3	ATPase ExPression
0.0303312	-0.669221	YBR068C	373861	2	BAP2	Branched-chain Amino acid Permease
0.0392592	-0.666882	YBR108W	454822	2	AIM3	Altered Inheritance rate of Mitochondria
0.0292085	-0.665164	YER152C	472657	5
0.0253761	-0.664956	YDR357C	1189199	4	CNL1	CNo-Like
0.032828	-0.663599	YKL219W	14485	11	COS9	COnserved Sequence
0.047062	-0.663198	YKR058W	552770	11	GLG1	Glycogenin-Like Gene
0.0438184	-0.662191	YBL050W	125125	2	SEC17	SECretory
0.048062	-0.656629	YNL127W	383987	14	FAR11	Factor ARrest
0.0447504	-0.654563	YPL220W	135790	16	RPL1A	Ribosomal Protein of the Large subunit
0.0293419	-0.654163	YGL153W	216273	7	PEX14	PEroXisome related
0.0377635	-0.651474	YHR079C	258244	8	IRE1	Inositol REquiring
0.0497501	-0.648585	YER110C	378762	5	KAP123	KAryoPherin
0.045867	-0.646407	YDR135C	723004	4	YCF1	Yeast Cadmium Factor
0.0497257	-0.645386	YDR327W	1125302	4
0.0231741	-0.645376	YLR433C	1004347	12	CNA1	CalciNeurin A
0.0364997	-0.643823	YGR246C	982482	7	BRF1	B-Related Factor
0.022437	-0.643672	YKL214C	31082	11	YRA2	Yeast RNA Annealing protein
0.0419801	-0.642622	YEL007W	141892	5	MIT1	Muc1 expressed Independent of TEC1
0.0264622	-0.642472	YJL093C	254737	10	TOK1
0.0319838	-0.639586	YKL135C	186460	11	APL2	clathrin Adaptor Protein complex Large chain
0.04892	-0.637775	YOR014W	357674	15	RTS1	Rox Three Suppressor
0.0398477	-0.637483	YOR099W	511825	15	KTR1	Kre Two Related
0.0398397	-0.636324	YPR007C	569336	16	REC8	RECombination
0.0431465	-0.63029	YIL147C	69791	9	SLN1	Synthetic Lethal of N-end rule
0.0474695	-0.629815	YER187W	566230	5
0.0482063	-0.622963	YKL207W	48194	11	EMC3	ER Membrane protein Complex
0.0359889	-0.620338	YOR090C	491123	15	PTC5	Phosphatase Two C
0.047062	-0.619198	YPL084W	394038	16	BRO1	BCK1-like Resistance to Osmotic shock
0.0364997	-0.61816	YKL014C	411619	11	URB1	Unhealthy Ribosome Biogenesis
0.0317989	-0.616934	YGL174W	174545	7	BUD13	BUD site selection
0.0367467	-0.614357	YMR154C	565999	13	RIM13	Regulator of IME2
0.0392592	-0.608566	YMR316W	904825	13	DIA1	Digs Into Agar
0.0375016	-0.606337	YCR084C	260311	3	TUP1	dTMP-UPtake
0.0235237	-0.606029	YOR122C	552298	15	PFY1	ProFilin of Yeast
0.033678	-0.605548	YMR310C	895716	13
0.0290552	-0.603358	YJR098C	613186	10
0.0243764	-0.602973	YMR237W	743749	13	BCH1	Bud7 and Chs6 Homolog
0.0453403	-0.599194	YGR125W	742325	7	VSB1	Vacuolar Storage of Basic amino acids
0.0262631	-0.596911	YKL121W	214142	11	DGR2	2-Deoxy-Glucose Resistant 2
0.0259304	-0.592665	YPR088C	711403	16	SRP54	Signal Recognition Particle 54-kD subunit
0.0204751	-0.592241	YKL142W	178515	11	MRP8	Mitochondrial Ribosomal Protein
0.0461832	-0.591909	YPL046C	466644	16	ELC1	ELongin C
0.0226807	-0.591835	YDR466W	1395121	4	PKH3	Pkb-activating Kinase Homolog
0.0392592	-0.589615	YDR419W	1303174	4	RAD30	RADiation sensitive
0.020051	-0.589305	YGL256W	15159	7	ADH4	Alcohol DeHydrogenase
0.0391574	-0.581561	YBL020W	182401	2	RFT1	Requiring Fifty-Three
0.0497556	-0.581359	YBR101C	443821	2	FES1	Factor Exchange for Ssa1p
0.0262631	-0.572399	YJL076W	295245	10	NET1	Nucleolar silencing Establishing factor and Telophase regulator
0.0380287	-0.564738	YML070W	133475	13	DAK1	DihydroxyAcetone Kinase
0.0255552	-0.564221	YDL142C	201719	4	CRD1	CaRDiolipin synthase
0.0210121	-0.564043	YJL077C	294666	10	ICS3	Increased Copper Sensitivity
0.0344305	-0.553639	YDR035W	521816	4	ARO3	AROmatic amino acid requiring	x
0.040005	-0.553009	YDR320C-A	1108280	4	DAD4	Duo1 And Dam1 interacting
0.0264622	-0.551894	YBR222C	666720	2	PCS60	Peroxisomal CoA-dependent Synthetase
0.0483772	-0.551664	YPL066W	426233	16	RGL1	Rho1 GEF Localizing
0.044787	-0.548892	YJR039W	503936	10	MLO127	Mitochondrially LOcalized protein of 127 kDa
0.0436025	-0.548706	YHR100C	314116	8	GEP4	GEnetic interactors of Prohibitins
0.0366423	-0.547583	YML074C	120089	13	FPR3	Fk 506-sensitive Proline Rotamase
0.0273459	-0.546366	YPR030W	627880	16	CSR2	Chs5 Spa2 Rescue
0.0429867	-0.539139	YDL002C	446967	4	NHP10	Non-Histone Protein
0.047341	-0.536665	YOR179C	671845	15	SYC1	Similar to Ysh1 C-terminal
0.049096	-0.536058	YDR358W	1190059	4	GGA1	Golgi-localized, Gamma-adaptin ear homology, Arf-binding protein
0.0462049	-0.53354	YPR156C	837909	16	TPO3	Transporter of POlyamines
0.0392279	-0.533539	YMR098C	460771	13	ATP25	ATPase
0.0367233	-0.533066	YKL094W	263349	11	YJU3
0.0483772	-0.53286	YCR008W	128470	3	SAT4
0.0419917	-0.529546	YDR003W	454122	4	RCR2	Resistance to Congo Red
0.0243764	-0.52673	YJR017C	466521	10	ESS1	ESSential
0.047062	-0.522317	YER136W	439616	5	GDI1	GDP Dissociation Inhibitor
0.031593	-0.511977	YIL111W	155222	9	COX5B	Cytochrome c OXidase
0.0404695	-0.51167	YIL143C	80510	9	SSL2	Suppressor of Stem-Loop mutation
0.0231741	-0.50609	YOR359W	1011189	15	VTS1	VTi1-2 Suppressor
0.001321	-0.506028	YDL109C	265258	4
0.0399004	-0.504706	YFR014C	172537	6	CMK1	CalModulin dependent protein Kinase
0.0360166	-0.500437	YKR068C	570328	11	BET3	Blocked Early in Transport
0.0377423	-0.495015	YLR128W	398530	12	DCN1	Defective in Cullin Neddylation
0.0341712	-0.492275	YOL133W	70325	15	HRT1	High level expression Reduces Ty3 transposition
0.0469991	-0.490445	YJR119C	644304	10	JHD2	JmjC domain-containing Histone Demethylase
0.0479623	-0.489183	YIL090W	193595	9	ICE2	Inheritance of Cortical ER
0.024095	-0.488663	YER165W	510373	5	PAB1	Poly(A) Binding protein
0.0296022	-0.488462	YGL224C	78015	7	SDT1	Suppressor of Disruption of TFIIS
0.0394657	-0.48843	YER049W	251728	5	TPA1	Termination and PolyAdenylation
0.0433693	-0.481691	YDR129C	713340	4	SAC6	Suppressor of ACtin
0.0359889	-0.481342	YKL128C	200884	11	PMU1	PhosphoMUtase
0.0248364	-0.47276	YNL204C	258375	14	SPS18	SPorulation-Specific
0.031593	-0.472707	YBR111C	461178	2	YSA1
0.0338949	-0.466681	YDL051W	363952	4	LHP1	La-Homologous Protein
0.0235237	-0.458799	YOR027W	381053	15	STI1	STress Inducible
0.0302222	-0.458757	YER122C	402871	5	GLO3	GLyOxalase
0.0399987	-0.455506	YOR032C	389771	15	HMS1	High-copy Mep Suppressor
0.0318891	-0.453453	YNR065C	750350	14
0.0342145	-0.450626	YPR028W	623527	16	YOP1	YIP One Partner
0.00215829	-0.449468	YPL186C	194512	16	UIP4	Ulp1 Interacting Protein
0.0436025	-0.446077	YOR071C	459480	15	NRT1	Nicotinamide Riboside Transporter
0.0423061	-0.445971	YFR035C	226121	6
0.0183311	-0.445456	YPL083C	396702	16	SEN54	Splicing ENdonuclease
0.0449875	-0.440999	YDL120W	245923	4	YFH1	Yeast Frataxin Homolog
0.0441592	-0.42376	YML057W	160180	13	CMP2	CalModulin binding Protein
0.031593	-0.419865	YDR100W	655013	4	TVP15	Tlg2-Vesicle Protein
0.0439139	-0.406118	YPL129W	305298	16	TAF14	TATA binding protein-Associated Factor
0.0437637	-0.405024	YLR240W	617533	12	VPS34	Vacuolar Protein Sorting
0.0409357	-0.403402	YPL100W	361872	16	ATG21	AuTophaGy related
0.0403588	-0.398031	YBR048W	332831	2	RPS11B	Ribosomal Protein of the Small subunit
0.0408264	-0.376384	YGR102C	694584	7	GTF1	Glutaminyl Transamidase subunit F
0.0290552	-0.375812	YDR121W	693585	4	DPB4	DNA Polymerase B (II) subunit
0.0407825	-0.363768	YMR141C	549736	13
0.0272665	-0.349629	YGL037C	427297	7	PNC1	Pyrazinamidase and NiCotinamidase
0.0204751	-0.340133	YJR065C	557809	10	ARP3	Actin-Related Protein
0.0330256	-0.333307	YLR152C	442958	12
0.0374876	-0.324575	YCR106W	310958	3	RDS1	Regulator of Drug Sensitivity
0.0315562	-0.318005	YKR062W	559666	11	TFA2	Transcription Factor a, subunit 2
0.0299629	-0.288981	YGR167W	832456	7	CLC1	Clathrin Light Chain
0.0433566	-0.264764	YMR152W	563096	13	YIM1
0.0348078	-0.237113	YBL058W	111437	2	SHP1	Suppressor of High-copy PP1
0.0495539	-0.162501	YML086C	95791	13	ALO1	D-Arabinono-1,4-Lactone Oxidase
0.0398086	0.206604	YGR201C	902520	7
0.049787	0.275114	YMR276W	818827	13	DSK2
0.0308972	0.281411	YHR199C	497490	8	AIM46	Altered Inheritance rate of Mitochondria
0.0415939	0.296322	YHR195W	490747	8	NVJ1	Nucleus-Vacuole Junction
0.0204751	0.372199	YNL321W	34696	14	VNX1	Vacuolar Na+/H+ eXchanger
0.0309659	0.390274	YPR129W	792687	16	SCD6	Suppressor of Clathrin Deficiency
0.0123016	0.40829	YDL134C	219662	4	PPH21	Protein PHosphatase
0.0424155	0.4125	YER119C	399496	5	AVT6	Amino acid Vacuolar Transport	x
0.020249	0.42769	YIL033C	290419	9	BCY1	Bypass of CYclic-AMP requirement
0.0243764	0.496711	YCL034W	61658	3	LSB5	Las Seventeen Binding protein
0.0317634	0.502194	YGL154C	215278	7	LYS5	LYSine requiring	x
0.0272665	0.510985	YBR016W	270247	2
0.0292602	0.542303	YBL102W	24098	2	SFT2	Suppressor of sed Five Ts
0.0394657	0.554034	YCR073C	242588	3	SSK22	Suppressor of Sensor Kinase
0.0303312	0.57489	YOR285W	849635	15	RDL1	RhoDanese-Like protein
0.0213245	0.614867	YKL198C	68232	11	PTK1	Putative serine/Threonine protein Kinase
0.0362801	0.620547	YBR109C	457919	2	CMD1	CalMoDulin
0.0404695	0.621157	YBR286W	774700	2	APE3	AminoPEptidase	x
0.0439139	0.63289	YPR037C	646448	16	ERV2	Essential for Respiration and Viability
0.0489869	0.635631	YER178W	546817	5	PDA1	Pyruvate Dehydrogenase Alpha
0.0461167	0.654141	YMR297W	861922	13	PRC1	PRoteinase C
0.0419917	0.664458	YIL153W	55198	9	RRD1	Resistant to Rapamycin Deletion
0.0218194	0.675549	YPL154C	259714	16	PEP4	carboxyPEPtidase Y-deficient
0.0129575	0.687874	YOL143C	54595	15	RIB4	RIBoflavin biosynthesis
0.0404219	0.714579	YCR004C	119575	3	YCP4
0.0213245	0.729698	YDR232W	927452	4	HEM1	HEMe biosynthesis
0.0399064	0.745598	YIL154C	53981	9	IMP2'	Independent of Mitochondrial Particle
0.031593	0.746841	YER004W	159580	5	FMP52	Found in Mitochondrial Proteome
0.0441511	0.760219	YLR459W	1057334	12	GAB1	GPI and Actin Bar
0.0402212	0.763764	YFL045C	43628	6	SEC53	SECretory
0.024055	0.805551	YNL305C	58898	14	BXI1	BaX Inhibitor
0.0496332	0.856275	YOL012C	303579	15	HTZ1	Histone Two A Z1
0.0319838	0.871464	YAR031W	186836	1	PRM9	Pheromone-Regulated Membrane protein
0.0425289	0.883209	YGR146C-A	785276	7
0.0204751	0.915461	YKR049C	526830	11	FMP46	Found in Mitochondrial Proteome
0.0485389	0.920655	YCR061W	225563	3	TVS1	Transmembrane protein Vital for Stress response
0.0302222	0.946419	YBR230C	679549	2	OM14	Outer Membrane Protein of 14 kDa
0.0339125	0.973031	YOR348C	986899	15	PUT4	Proline UTilization
0.0209598	0.998149	YLR356W	840321	12	ATG33	AuTophaGy related
0.0213245	1.01292	YCL025C	76018	3	AGP1	high-Affinity Glutamine Permease
0.0244007	1.02702	YJL045W	356024	10	SDH9	Succinate DeHydrogenase
0.0431488	1.05718	YEL038W	80462	5	UTR4	Unidentified TRanscript
0.0401311	1.06376	YNL202W	259578	14	SPS19	SPorulation-Specific
0.0459807	1.07847	YDR256C	968133	4	CTA1	CaTalase A
0.0214172	1.14402	YLR438W	1012501	12	CAR2	Catabolism of ARginine
0.0299629	1.15013	YCR025C	163446	3
0.0212019	1.18314	YOL110W	109176	15	SHR5	Suppressor of Hyperactive Ras
0.0348114	1.21445	YJL043W	360130	10
0.0427705	1.26608	YCR010C	132273	3	ADY2	Accumulation of DYads
0.0441511	1.34231	YPR200C	939279	16	ARR2	ARsenicals Resistance
0.0330869	1.42009	YOR384W	1061564	15	FRE5	Ferric REductase
0.0421053	1.44854	YGL242C	44652	7
0.0424412	1.56559	YKL144C	175843	11	RPC25	RNA Polymerase C
0.0327175	4.96001	YPL095C	368071	16	EEB1	Ethyl Ester Biosynthesis
0.000901367	5.03235	YOR377W	1046226	15	ATF1	AcetylTransFerase
0.0338949	5.46588	YBR177C	584807	2	EHT1	Ethanol Hexanoyl Transferase
0.0277078	16.3271	YJL113W	198678	10
0.00369347	18.5408	YDR149C	755555	4
0.00369347	18.7442	YOR383C	1060441	15	FIT3	Facilitator of Iron Transport
0.0268274	20.2739	YDR340W	1150881	4
0.029402	21.06	YHL030W-A	39074	8

## Sheet: Feuil1
S000000003	YAL003W	S. cerevisiae	EFB1	Elongation Factor Beta	142174
S000000008	YAL010C	S. cerevisiae	MDM10	Mitochondrial Distribution and Morphology	134184
S000000009	YAL011W	S. cerevisiae	SWC3	SWr Complex	132199
S000000013	YAL015C	S. cerevisiae	NTG1	eNdonuclease Three-like Glycosylase	126903
S000000017	YAL019W	S. cerevisiae	FUN30	Function Unknown Now	114919
S000000021	YAL023C	S. cerevisiae	PMT2	Protein O-MannosylTransferase	106272
S000000022	YAL024C	S. cerevisiae	LTE1	Low Temperature Essential	101565
S000000027	YAL029C	S. cerevisiae	MYO4	MYOsin	87855
S000000030	YAL032C	S. cerevisiae	PRP45	Pre-mRNA Processing	83335
S000000033	YAL035W	S. cerevisiae	FUN12	Function Unknown Now	76427
S000000035	YAL037W	S. cerevisiae			74020
S000000039	YAL041W	S. cerevisiae	CDC24	Cell Division Cycle	62840
S000000045	YAL047C	S. cerevisiae	SPC72	Spindle Pole Component	54989
S000000055	YAL059W	S. cerevisiae	ECM1	ExtraCellular Mutant	36509
S000000063	YAR002W	S. cerevisiae	NUP60	NUclear Pore	152257
S000000064	YAR003W	S. cerevisiae	SWD1	Set1c, WD40 repeat protein	155005
S000000069	YAR014C	S. cerevisiae	BUD14	BUD site selection	166742
S000000078	YAR031W	S. cerevisiae	PRM9	Pheromone-Regulated Membrane protein	186836
S000000098	YBL002W	S. cerevisiae	HTB2	Histone h Two B	236492
S000000100	YBL004W	S. cerevisiae	UTP20	U Three Protein	227636
S000000112	YBL016W	S. cerevisiae	FUS3	cell FUSion	192451
S000000113	YBL017C	S. cerevisiae	PEP1	carboxyPEPtidase Y-deficient	186844
S000000114	YBL018C	S. cerevisiae	POP8	Processing Of Precursor RNAs	185998
S000000116	YBL020W	S. cerevisiae	RFT1	Requiring Fifty-Three	182401
S000000117	YBL021C	S. cerevisiae	HAP3	Heme Activator Protein	181660
S000000119	YBL023C	S. cerevisiae	MCM2	MiniChromosome Maintenance	174920
S000000125	YBL029W	S. cerevisiae			166134
S000000127	YBL031W	S. cerevisiae	SHE1	Sensitivity to High Expression	161699
S000000134	YBL038W	S. cerevisiae	MRPL16	Mitochondrial Ribosomal Protein, Large subunit	146187
S000000142	YBL046W	S. cerevisiae	PSY4	Platinum SensitivitY	132424
S000000146	YBL050W	S. cerevisiae	SEC17	SECretory	125125
S000000148	YBL052C	S. cerevisiae	SAS3	Something About Silencing	119379
S000000150	YBL054W	S. cerevisiae	TOD6	Twin Of Dot6p	117589
S000000153	YBL057C	S. cerevisiae	PTH2	Peptidyl-Trna Hydrolase	112801
S000000154	YBL058W	S. cerevisiae	SHP1	Suppressor of High-copy PP1	111437
S000007488	YBL059C-A	S. cerevisiae	CMC2	Cx9C Motif-Containing protein	110125
S000000155	YBL059W	S. cerevisiae	IAI11	Interactor of AIm11	110594
S000000156	YBL060W	S. cerevisiae	YEL1	Yeast EFA6-Like	107932
S000000157	YBL061C	S. cerevisiae	SKT5		105316
S000000170	YBL074C	S. cerevisiae	AAR2	A1-Alpha2 Repression	86722
S000000172	YBL076C	S. cerevisiae	ILS1	IsoLeucine-tRNA Synthetase	81043
S000000175	YBL079W	S. cerevisiae	NUP170	NUclear Pore	75259
S000000181	YBL085W	S. cerevisiae	BOI1	Bem1 (One) Interacting protein	63876
S000000186	YBL090W	S. cerevisiae	MRP21	Mitochondrial Ribosomal Protein	48825
S000000191	YBL095W	S. cerevisiae	MRX3	Mitochondrial oRganization of gene eXpression (MIOREX)	43277
S000000192	YBL096C	S. cerevisiae			43174
S000000198	YBL102W	S. cerevisiae	SFT2	Suppressor of sed Five Ts	24098
S000000201	YBL105C	S. cerevisiae	PKC1	Protein Kinase C	14241
S000000211	YBR007C	S. cerevisiae	DSF2	Deletion Suppressor of mptFive/pufFive mutation	248806
S000000218	YBR014C	S. cerevisiae	GRX7	GlutaRedoXin	266725
S000000219	YBR015C	S. cerevisiae	MNN2	MaNNosyltransferase	267710
S000000220	YBR016W	S. cerevisiae			270247
S000000225	YBR021W	S. cerevisiae	FUR4	5-FlUoRouridine sensitivity	281443
S000000227	YBR023C	S. cerevisiae	CHS3	CHitin Synthase-related	284428
S000000228	YBR024W	S. cerevisiae	SCO2	Suppressor of Cytochrome Oxidase deficiency	289445
S000000231	YBR027C	S. cerevisiae			294024
S000000246	YBR042C	S. cerevisiae	CST26	Chromosome STability	320416
S000000252	YBR048W	S. cerevisiae	RPS11B	Ribosomal Protein of the Small subunit	332831
S000000259	YBR055C	S. cerevisiae	PRP6	Pre-mRNA Processing	344602
S000028736	YBR056W-A	S. cerevisiae	MNC1	MaNganese Chelating protein 1	351255
S000000261	YBR057C	S. cerevisiae	MUM2	MUddled Meiosis	352193
S000000264	YBR060C	S. cerevisiae	ORC2	Origin Recognition Complex	360652
S000000265	YBR061C	S. cerevisiae	TRM7	Transfer RNA Methyltransferase	364787
S000000272	YBR068C	S. cerevisiae	BAP2	Branched-chain Amino acid Permease	373861
S000000277	YBR073W	S. cerevisiae	RDH54	RaD54 Homolog	383112
S000000281	YBR077C	S. cerevisiae	SLM4	Synthetic Lethal with Mss4	391805
S000000284	YBR080C	S. cerevisiae	SEC18	SECretory	398614
S000000287	YBR083W	S. cerevisiae	TEC1	Transposon Enhancement Control	409169
S000000294	YBR090C	S. cerevisiae			426333
S000000299	YBR095C	S. cerevisiae	RXT2		434406
S000000301	YBR097W	S. cerevisiae	VPS15	Vacuolar Protein Sorting	436951
S000000302	YBR098W	S. cerevisiae	MMS4	Methyl MethaneSulfonate sensitivity	441515
S000000305	YBR101C	S. cerevisiae	FES1	Factor Exchange for Ssa1p	443821
S000000311	YBR107C	S. cerevisiae	IML3	Increased Minichromosome Loss	453793
S000000312	YBR108W	S. cerevisiae	AIM3	Altered Inheritance rate of Mitochondria	454822
S000000313	YBR109C	S. cerevisiae	CMD1	CalMoDulin	457919
S000000314	YBR110W	S. cerevisiae	ALG1	Asparagine-Linked Glycosylation	458872
S000000315	YBR111C	S. cerevisiae	YSA1		461178
S000000319	YBR115C	S. cerevisiae	LYS2	LYSine requiring	469748
S000000329	YBR125C	S. cerevisiae	PTC4	Phosphatase Two C	487199
S000000335	YBR131W	S. cerevisiae	CCZ1	Calcium Caffeine Zinc sensitivity	497163
S000000337	YBR133C	S. cerevisiae	HSL7	Histone Synthetic Lethal	501804
S000000355	YBR151W	S. cerevisiae	APD1	Actin Patches Distal	545028
S000000356	YBR152W	S. cerevisiae	SPP381	Suppressor of PrP38-1	546376
S000000358	YBR154C	S. cerevisiae	RPB5	RNA Polymerase B	548362
S000000359	YBR155W	S. cerevisiae	CNS1	CyclophiliN Seven suppressor	549771
S000000361	YBR157C	S. cerevisiae	ICS2	Increased Copper Sensitivity	553543
S000000362	YBR158W	S. cerevisiae	AMN1	Antagonist of Mitotic exit Network	556549
S000000363	YBR159W	S. cerevisiae	IFA38		558685
S000000365	YBR161W	S. cerevisiae	CSH1	CSG1/SUR1 Homolog	561634
S000000366	YBR162C	S. cerevisiae	TOS1	Target Of Sbf	563203
S000002158	YBR162W-A	S. cerevisiae	YSY6		565231
S000000367	YBR163W	S. cerevisiae	EXO5	EXOnuclease V	565723
S000000368	YBR164C	S. cerevisiae	ARL1	ADP-Ribosylation factor-Like	567875
S000000370	YBR166C	S. cerevisiae	TYR1	TYRosine	569842
S000000376	YBR172C	S. cerevisiae	SMY2	Suppressor of MYo2-66	579150
S000000381	YBR177C	S. cerevisiae	EHT1	Ethanol Hexanoyl Transferase	584807
S000000382	YBR178W	S. cerevisiae			586071
S000000390	YBR186W	S. cerevisiae	PCH2	Pachytene CHeckpoint	600553
S000000396	YBR192W	S. cerevisiae	RIM2	Replication In Mitochondria	607652
S000000405	YBR201W	S. cerevisiae	DER1	Degradation in the Endoplasmic Reticulum	623576
S000000408	YBR204C	S. cerevisiae	LDH1	Lipid Droplet Hydrolase	632254
S000000409	YBR205W	S. cerevisiae	KTR3	Kre Two Related	633622
S000000410	YBR206W	S. cerevisiae			634601
S000000423	YBR219C	S. cerevisiae			662499
S000000424	YBR220C	S. cerevisiae			662995
S000000426	YBR222C	S. cerevisiae	PCS60	Peroxisomal CoA-dependent Synthetase	666720
S000000427	YBR223C	S. cerevisiae	TDP1	Tyrosyl-DNA Phosphodiesterase	668663
S000000431	YBR227C	S. cerevisiae	MCX1	Mitochondrial ClpX	673572
S000000434	YBR230C	S. cerevisiae	OM14	Outer Membrane Protein of 14 kDa	679549
S000000441	YBR237W	S. cerevisiae	PRP5	Pre-mRNA Processing	691969
S000000443	YBR239C	S. cerevisiae	ERT1	Ethanol Regulated Transcription factor	698354
S000000448	YBR244W	S. cerevisiae	GPX2	Glutathione PeroXidase	707528
S000000449	YBR245C	S. cerevisiae	ISW1	Imitation SWitch subfamily	708150
S000000451	YBR247C	S. cerevisiae	ENP1	Essential Nuclear Protein	713004
S000000458	YBR254C	S. cerevisiae	TRS20	TRapp Subunit	723736
S000000461	YBR257W	S. cerevisiae	POP4	Processing Of Precursor RNAs	728885
S000000465	YBR261C	S. cerevisiae	TAE1	Translation Associated Element	734832
S000000466	YBR262C	S. cerevisiae	MIC12	MItochondrial contact site and Cristae organizing system	735720
S000000467	YBR263W	S. cerevisiae	SHM1	Serine HydroxyMethyltransferase	736264
S000000468	YBR264C	S. cerevisiae	YPT10	Yeast Protein Two	737770
S000000471	YBR267W	S. cerevisiae	REI1	REquired for Isotropic bud growth	739841
S000000472	YBR268W	S. cerevisiae	MRPL37	Mitochondrial Ribosomal Protein, Large subunit	741299
S000000475	YBR271W	S. cerevisiae	EFM2	Elongation Factor Methyltransferase	744852
S000000477	YBR273C	S. cerevisiae	UBX7	UBiquitin regulatory X	748061
S000000483	YBR279W	S. cerevisiae	PAF1	RNA Polymerase II Associated Factor	761257
S000000486	YBR282W	S. cerevisiae	MRPL27	Mitochondrial Ribosomal Protein, Large subunit	768240
S000000490	YBR286W	S. cerevisiae	APE3	AminoPEptidase	774700
S000000496	YBR292C	S. cerevisiae			784702
S000000497	YBR293W	S. cerevisiae	VBA2	Vacuolar Basic Amino acid transporter	787006
S000000503	YBR299W	S. cerevisiae	MAL32	MALtose	805351
S000000521	YCL016C	S. cerevisiae	DCC1	Defective in sister Chromatid Cohesion	94621
S000000522	YCL017C	S. cerevisiae	NFS1	NiFS-like	92777
S000000530	YCL025C	S. cerevisiae	AGP1	high-Affinity Glutamine Permease	76018
S000000534	YCL029C	S. cerevisiae	BIK1	BIlateral Karyogamy defect	68599
S000000539	YCL034W	S. cerevisiae	LSB5	Las Seventeen Binding protein	61658
S000000550	YCL045C	S. cerevisiae	EMC1	ER Membrane protein Complex	44623
S000000553	YCL048W	S. cerevisiae	SPS22	SPorulation Specific 2 too (2)	42165
S000000560	YCL055W	S. cerevisiae	KAR4	KARyogamy	27929
S000000595	YCR002C	S. cerevisiae	CDC10	Cell Division Cycle	117380
S000000596	YCR003W	S. cerevisiae	MRPL32	Mitochondrial Ribosomal Protein, Large subunit	118620
S000000597	YCR004C	S. cerevisiae	YCP4		119575
S000000601	YCR008W	S. cerevisiae	SAT4		128470
S000000603	YCR010C	S. cerevisiae	ADY2	Accumulation of DYads	132273
S000000607	YCR014C	S. cerevisiae	POL4	POLymerase	139185
S000000608	YCR015C	S. cerevisiae	CTO1	Cold TOlerance	141217
S000000610	YCR017C	S. cerevisiae	CWH43	Calcofluor White Hypersensitive	144773
S000000613	YCR020C	S. cerevisiae	PET18	PETite colonies	154012
S000000618	YCR024C	S. cerevisiae	SLM5	Synthetic Lethal with Mss4	160744
S000000620	YCR025C	S. cerevisiae			163446
S000000622	YCR027C	S. cerevisiae	RHB1	RHeB homolog	167370
S000000631	YCR035C	S. cerevisiae	RRP43	Ribosomal RNA Processing	191834
S000000632	YCR036W	S. cerevisiae	RBK1	RiBoKinase	193297
S000000633	YCR037C	S. cerevisiae	PHO87	PHOsphate metabolism	194414
S000000638	YCR042C	S. cerevisiae	TAF2	TATA binding protein-Associated Factor	201174
S000000643	YCR047C	S. cerevisiae	BUD23	BUD site selection	210718
S000000645	YCR049C	S. cerevisiae			211871
S000000646	YCR050C	S. cerevisiae			213464
S000000648	YCR052W	S. cerevisiae	RSC6	Remodel the Structure of Chromatin	214994
S000000649	YCR053W	S. cerevisiae	THR4	THReonine requiring	216697
S000000657	YCR061W	S. cerevisiae	TVS1	Transmembrane protein Vital for Stress response	225563
S000000660	YCR064C	S. cerevisiae			228095
S000000669	YCR073C	S. cerevisiae	SSK22	Suppressor of Sensor Kinase	242588
S000000673	YCR077C	S. cerevisiae	PAT1	Protein Associated with Topoisomerase II	250238
S000000677	YCR081W	S. cerevisiae	SRB8	Suppressor of RNA polymerase B	254371
S000000678	YCR082W	S. cerevisiae	AHC2	Ada Histone acetyltransferase complex Component	258883
S000000680	YCR084C	S. cerevisiae	TUP1	dTMP-UPtake	260311
S000000683	YCR087W	S. cerevisiae			263976
S000000684	YCR088W	S. cerevisiae	ABP1	Actin Binding Protein	265068
S000000694	YCR097W	S. cerevisiae	HMRA1	Hidden Mat Right A	293835
S000000695	YCR098C	S. cerevisiae	GIT1	GlycerophosphoInosiTol	297049
S000000699	YCR102C	S. cerevisiae			304361
S000000703	YCR106W	S. cerevisiae	RDS1	Regulator of Drug Sensitivity	310958
S000002160	YDL002C	S. cerevisiae	NHP10	Non-Histone Protein	446967
S000002170	YDL012C	S. cerevisiae			431108
S000002178	YDL020C	S. cerevisiae	RPN4	Regulatory Particle Non-ATPase	415113
S000002186	YDL028C	S. cerevisiae	MPS1	MonoPolar Spindle	400997
S000002188	YDL030W	S. cerevisiae	PRP9	Pre-mRNA Processing	397537
S000002189	YDL031W	S. cerevisiae	DBP10	Dead Box Protein	394217
S000002198	YDL040C	S. cerevisiae	NAT1	N-terminal AcetylTransferase	378874
S000002201	YDL043C	S. cerevisiae	PRP11	Pre-mRNA Processing	375680
S000002202	YDL044C	S. cerevisiae	MTF2	Mitochondrial Transcription Factor	373967
S000002203	YDL045C	S. cerevisiae	FAD1	FAD synthetase	372688
S000006430	YDL045W-A	S. cerevisiae	MRP10	Mitochondrial Ribosomal Protein	372248
S000002206	YDL048C	S. cerevisiae	STP4	protein with similarity to Stp1p	366739
S000002207	YDL049C	S. cerevisiae	KNH1	Kre9(Nine) Homolog	365068
S000002208	YDL050C	S. cerevisiae			364446
S000002209	YDL051W	S. cerevisiae	LHP1	La-Homologous Protein	363952
S000002216	YDL058W	S. cerevisiae	USO1	yUSOu - transport in Japanese	345665
S000002221	YDL063C	S. cerevisiae	SYO1	SYnchronized impOrt or SYmpOrtin	338272
S000002232	YDL074C	S. cerevisiae	BRE1	BREfeldin A sensitivity	324047
S000002234	YDL076C	S. cerevisiae	RXT3		320668
S000002248	YDL090C	S. cerevisiae	RAM1	RAS protein and A-factor Maturation	295034
S000002250	YDL092W	S. cerevisiae	SRP14	Signal Recognition Particle	292781
S000002251	YDL093W	S. cerevisiae	PMT5	Protein O-MannosylTransferase	289909
S000002252	YDL094C	S. cerevisiae			289572
S000002256	YDL098C	S. cerevisiae	SNU23	Small NUclear ribonucleoprotein associated	284581
S000002257	YDL099W	S. cerevisiae	BUG1	Binder of USO1 and GRH1	283419
S000002258	YDL100C	S. cerevisiae	GET3	Guided Entry of Tail-anchored proteins	282112
S000002263	YDL105W	S. cerevisiae	NSE4	Non-SMC Element	272389
S000002265	YDL107W	S. cerevisiae	MSS2	Mitochondrial Splicing	268921
S000002266	YDL108W	S. cerevisiae	KIN28	protein KINase	267698
S000002267	YDL109C	S. cerevisiae			265258
S000002273	YDL115C	S. cerevisiae	IWR1	Interacts With RNA polymerase II	253995
S000002274	YDL116W	S. cerevisiae	NUP84	NUclear Pore	251566
S000002277	YDL119C	S. cerevisiae	HEM25	HEMe synthesis by SLC25 family member	246689
S000002278	YDL120W	S. cerevisiae	YFH1	Yeast Frataxin Homolog	245923
S000002286	YDL128W	S. cerevisiae	VCX1	VaCuolar H+/Ca2+ eXchanger	232652
S000002289	YDL131W	S. cerevisiae	LYS21	LYSine	227393
S000002292	YDL134C	S. cerevisiae	PPH21	Protein PHosphatase	219662
S000002297	YDL138W	S. cerevisiae	RGT2	Restores Glucose Transport	213351
S000002301	YDL142C	S. cerevisiae	CRD1	CaRDiolipin synthase	201719
S000002304	YDL145C	S. cerevisiae	COP1	COat Protein	194571
S000002309	YDL150W	S. cerevisiae	RPC53	RNA Polymerase C	183343
S000002315	YDL156W	S. cerevisiae	CMR1	Changed Mutation Rate	174918
S000002316	YDL157C	S. cerevisiae			174232
S000028520	YDL160C-A	S. cerevisiae	MHF2	Mph1-associated Histone-Fold protein	169366
S000002320	YDL161W	S. cerevisiae	ENT1	Epsin N-Terminal homology	167714
S000002323	YDL164C	S. cerevisiae	CDC9	Cell Division Cycle	164987
S000002334	YDL175C	S. cerevisiae	AIR2	Arginine methyltransferase-Interacting RING finger protein	144484
S000002341	YDL182W	S. cerevisiae	LYS20	LYSine requiring	133437
S000002342	YDL183C	S. cerevisiae	MRX19	Mitochondrial oRganization of gene eXpression (MIOREX)	130871
S000002347	YDL188C	S. cerevisiae	PPH22	Protein PHosphatase	123865
S000002348	YDL189W	S. cerevisiae	RBS1	RNA-Binding Suppressor of PAS kinase	122216
S000002351	YDL192W	S. cerevisiae	ARF1	ADP-Ribosylation Factor	116321
S000002352	YDL193W	S. cerevisiae	NUS1	Nuclear Undecaprenyl pyrophosphate Synthase	114672
S000002360	YDL201W	S. cerevisiae	TRM8	Transfer RNA Methyltransferase	99561
S000002361	YDL202W	S. cerevisiae	MRPL11	Mitochondrial Ribosomal Protein, Large subunit	98475
S000002365	YDL206W	S. cerevisiae			90176
S000002372	YDL213C	S. cerevisiae	NOP6	NucleOlar Protein	77289
S000002375	YDL216C	S. cerevisiae	RRI1	Regulator of Rub1 specific Isopeptidase	68997
S000002376	YDL217C	S. cerevisiae	TIM22	Translocase of the Inner Mitochondrial membrane	67983
S000002378	YDL219W	S. cerevisiae	DTD1	D-Tyr-tRNA(Tyr) Deacylase	65242
S000002384	YDL225W	S. cerevisiae	SHS1	Seventh Homolog of Septin	52445
S000002385	YDL226C	S. cerevisiae	GCS1	Growth Cold Sensitive	51115
S000002395	YDL236W	S. cerevisiae	PHO13	PHOsphate metabolism	32296
S000002399	YDL240W	S. cerevisiae	LRG1	Lim-RhoGap homolog	22823
S000002403	YDL244W	S. cerevisiae	THI13	THIamine metabolism	16204
S000002410	YDR003W	S. cerevisiae	RCR2	Resistance to Congo Red	454122
S000002412	YDR005C	S. cerevisiae	MAF1		456836
S000002421	YDR014W	S. cerevisiae	RAD61	RADiation sensitive	474046
S000002423	YDR016C	S. cerevisiae	DAD1	Duo1 And Dam1 interacting	478474
S000002433	YDR026C	S. cerevisiae	NSI1	NTS1 SIlencing protein 1	492556
S000002438	YDR031W	S. cerevisiae	MIX14	Mitochondrial Intermembrane space CX(n)C motif protein	503498
S000002441	YDR034C	S. cerevisiae	LYS14	LYSine requiring	509737
S000002442	YDR035W	S. cerevisiae	ARO3	AROmatic amino acid requiring	521816
S000002445	YDR038C	S. cerevisiae	ENA5	Exitus NAtru (Latin, "exit sodium")	527422
S000002450	YDR043C	S. cerevisiae	NRG1	Negative Regulator of Glucose-repressed genes	542674
S000002453	YDR046C	S. cerevisiae	BAP3	Branched-chain Amino acid Permease	548762
S000002462	YDR055W	S. cerevisiae	PST1	Protoplasts-SecreTed	563527
S000002463	YDR056C	S. cerevisiae	EMC10	ER Membrane protein Complex	565023
S000002465	YDR058C	S. cerevisiae	TGL2	TriacylGlycerol Lipase	567723
S000002467	YDR060W	S. cerevisiae	MAK21	MAintenance of Killer	570649
S000002468	YDR061W	S. cerevisiae			574164
S000002478	YDR071C	S. cerevisiae	PAA1	PolyAmine Acetyltransferase	588827
S000002484	YDR077W	S. cerevisiae	SED1	Suppression of Exponential Defect	600793
S000002485	YDR078C	S. cerevisiae	SHU2	Suppressor of HydroxyUrea sensitivity	602198
S000002487	YDR080W	S. cerevisiae	VPS41	Vacuolar Protein Sorting	604008
S000002490	YDR083W	S. cerevisiae	RRP8	Ribosomal RNA Processing	612073
S000002492	YDR085C	S. cerevisiae	AFR1	Alpha-Factor Receptor regulator	614288
S000002493	YDR086C	S. cerevisiae	SSS1	Sec Sixty-one Suppressor	616928
S000002495	YDR088C	S. cerevisiae	SLU7	Synergistic Lethal with U5 snRNA	618497
S000002496	YDR089W	S. cerevisiae	VTC5	Vacuole Transporter Chaperone	622112
S000002498	YDR091C	S. cerevisiae	RLI1	RNase L Inhibitor	626708
S000002499	YDR092W	S. cerevisiae	UBC13	UBiquitin-Conjugating	629876
S000002507	YDR100W	S. cerevisiae	TVP15	Tlg2-Vesicle Protein	655013
S000002508	YDR101C	S. cerevisiae	ARX1	Associated with Ribosomal eXport complex	655686
S000002510	YDR103W	S. cerevisiae	STE5	STErile	658350
S000002513	YDR106W	S. cerevisiae	ARP10	Actin-Related Protein	667004
S000002515	YDR108W	S. cerevisiae	TRS85	TRapp Subunit	671269
S000002527	YDR120C	S. cerevisiae	TRM1	tRNA Methyltransferase	691549
S000002528	YDR121W	S. cerevisiae	DPB4	DNA Polymerase B (II) subunit	693585
S000002529	YDR122W	S. cerevisiae	KIN1	KINase	694700
S000002530	YDR123C	S. cerevisiae	INO2	INOsitol requiring	698554
S000002532	YDR125C	S. cerevisiae	ECM18	ExtraCellular Mutant	701397
S000002536	YDR129C	S. cerevisiae	SAC6	Suppressor of ACtin	713340
S000002537	YDR130C	S. cerevisiae	FIN1	Filaments In between Nuclei	715747
S000002538	YDR131C	S. cerevisiae			716790
S000002542	YDR135C	S. cerevisiae	YCF1	Yeast Cadmium Factor	723004
S000002544	YDR137W	S. cerevisiae	RGP1	Reduced Growth Phenotype	728259
S000002545	YDR138W	S. cerevisiae	HPR1	HyPerRecombination	730578
S000002546	YDR139C	S. cerevisiae	RUB1	Related to UBiquitin	733618
S000002556	YDR149C	S. cerevisiae			755555
S000002558	YDR151C	S. cerevisiae	CTH1	Cysteine-Three-Histidine	764178
S000002559	YDR152W	S. cerevisiae	GIR2	Genetically Interacts with Ribosomal genes	765706
S000002563	YDR156W	S. cerevisiae	RPA14	RNA Polymerase A	769525
S000002564	YDR157W	S. cerevisiae			769931
S000002566	YDR159W	S. cerevisiae	SAC3	Suppressor of ACtin	771877
S000002577	YDR170C	S. cerevisiae	SEC7	SECretory	796193
S000002579	YDR172W	S. cerevisiae	SUP35	SUPpressor	808324
S000002583	YDR176W	S. cerevisiae	NGG1		814452
S000002590	YDR182W	S. cerevisiae	CDC1	Cell Division Cycle	827582
S000002592	YDR184C	S. cerevisiae	ATC1	Aip Three Complex	830629
S000002602	YDR194C	S. cerevisiae	MSS116	Mitochondrial Splicing System	845952
S000002603	YDR195W	S. cerevisiae	REF2	RNA End Formation	848599
S000002605	YDR197W	S. cerevisiae	CBS2	Cytochrome B Synthesis	851228
S000002606	YDR198C	S. cerevisiae	RKM2	Ribosomal protein lysine (K) Methyltransferase	852533
S000002607	YDR199W	S. cerevisiae			854175
S000002608	YDR200C	S. cerevisiae	VPS64	Vacuolar Protein Sorting	854279
S000002636	YDR228C	S. cerevisiae	PCF11	Protein 1 of Cleavage and polyadenylation Factor I	921926
S000002640	YDR232W	S. cerevisiae	HEM1	HEMe biosynthesis	927452
S000002643	YDR235W	S. cerevisiae	PRP42	Pre-mRNA Processing	933504
S000002644	YDR236C	S. cerevisiae	FMN1	FMN biosynthesis	935236
S000002645	YDR237W	S. cerevisiae	MRPL7	Mitochondrial Ribosomal Protein, Large subunit	936615
S000002646	YDR238C	S. cerevisiae	SEC26	SECretory	937895
S000002648	YDR240C	S. cerevisiae	SNU56	Small NUclear ribonucleoprotein associated	943674
S000002651	YDR243C	S. cerevisiae	PRP28	Pre-mRNA Processing	948518
S000002664	YDR256C	S. cerevisiae	CTA1	CaTalase A	968133
S000002685	YDR277C	S. cerevisiae	MTH1	MSN Three Homolog	1014401
S000002687	YDR279W	S. cerevisiae	RNH202	RNase H	1019368
S000002693	YDR285W	S. cerevisiae	ZIP1	molecular ZIPper	1032436
S000002694	YDR286C	S. cerevisiae	MGP12	Mitochondrial Glutaredoxin-like Protein of 12 kDa	1035231
S000002700	YDR292C	S. cerevisiae	SRP101	Signal Recognition Particle	1043146
S000002703	YDR295C	S. cerevisiae	HDA2	Histone DeAcetylase	1052623
S000002709	YDR301W	S. cerevisiae	CFT1	Cleavage Factor Two	1063352
S000002711	YDR303C	S. cerevisiae	RSC3	Remodel the Structure of Chromatin	1068729
S000002712	YDR304C	S. cerevisiae	CPR5	Cyclosporin-sensitive Proline Rotamase	1071880
S000002719	YDR311W	S. cerevisiae	TFB1	Transcription Factor B	1085065
S000002720	YDR312W	S. cerevisiae	SSF2	Suppressor of ste4 (Four)	1087581
S000002721	YDR313C	S. cerevisiae	PIB1	PhosphatidylInositol(3)-phosphate Binding	1089219
S000002724	YDR316W	S. cerevisiae	OMS1	OXA1 Multicopy Suppressor	1093763
S000007399	YDR316W-B	S. cerevisiae			1096064
S000002726	YDR318W	S. cerevisiae	MCM21	MiniChromosome Maintenance	1103758
S000002728	YDR320C	S. cerevisiae	SWA2	Synthetic lethal With Arf1	1106095
S000007604	YDR320C-A	S. cerevisiae	DAD4	Duo1 And Dam1 interacting	1108280
S000002734	YDR326C	S. cerevisiae	YSP2	Yeast Suicide Protein	1120609
S000002735	YDR327W	S. cerevisiae			1125302
S000002739	YDR331W	S. cerevisiae	GPI8	GlycosylPhosphatidylInositol anchor biosynthesis	1129588
S000002740	YDR332W	S. cerevisiae	IRC3	Increased Recombination Centers	1131001
S000002741	YDR333C	S. cerevisiae	RQC1	Ribosome Quality Control	1133260
S000002742	YDR334W	S. cerevisiae	SWR1	SWi2/snf2-Related	1135932
S000002747	YDR339C	S. cerevisiae	FCF1	Faf1p Copurifying Factor	1149951
S000002748	YDR340W	S. cerevisiae			1150881
S000002754	YDR346C	S. cerevisiae	SVF1	SurVival Factor	1167214
S000002755	YDR347W	S. cerevisiae	MRP1	Mitochondrial Ribosomal Protein	1169178
S000002765	YDR357C	S. cerevisiae	CNL1	CNo-Like	1189199
S000002766	YDR358W	S. cerevisiae	GGA1	Golgi-localized, Gamma-adaptin ear homology, Arf-binding protein	1190059
S000002779	YDR371W	S. cerevisiae	CTS2	ChiTinaSe	1219413
S000002783	YDR375C	S. cerevisiae	BCS1	ubiquinol-cytochrome c reductase (bc1) Synthesis	1225166
S000002784	YDR376W	S. cerevisiae	ARH1	Adrenodoxin Reductase Homolog	1226822
S000002787	YDR379W	S. cerevisiae	RGA2	Rho GTPase Activating Protein	1230167
S000002789	YDR381W	S. cerevisiae	YRA1	Yeast RNA Annealing protein	1236558
S000002791	YDR383C	S. cerevisiae	NKP1	Non-essential Kinetochore Protein	1239960
S000002794	YDR386W	S. cerevisiae	MUS81	MMS and UV Sensitive	1246084
S000002797	YDR389W	S. cerevisiae	SAC7	Suppressor of ACtin	1252537
S000002798	YDR390C	S. cerevisiae	UBA2	UBiquitin Activating	1254937
S000002800	YDR392W	S. cerevisiae	SPT3	SuPpressor of Ty's	1258696
S000002803	YDR395W	S. cerevisiae	SXM1	Suppressor of mRNA eXport Mutant	1263324
S000002804	YDR396W	S. cerevisiae			1266295
S000002806	YDR398W	S. cerevisiae	UTP5	U Three Protein	1267471
S000002810	YDR402C	S. cerevisiae	DIT2	DITyrosine	1272234
S000002815	YDR407C	S. cerevisiae	TRS120	TRapp Subunit	1284069
S000002822	YDR414C	S. cerevisiae	ERD1	Endoplasmic reticulum Retention Defective	1295598
S000002824	YDR416W	S. cerevisiae	SYF1	SYnthetic lethal with cdcForty	1298432
S000002826	YDR418W	S. cerevisiae	RPL12B	Ribosomal Protein of the Large subunit	1301616
S000002827	YDR419W	S. cerevisiae	RAD30	RADiation sensitive	1303174
S000002829	YDR421W	S. cerevisiae	ARO80	AROmatic amino acid requiring	1312040
S000002831	YDR423C	S. cerevisiae	CAD1	CADmium resistance	1318046
S000002840	YDR432W	S. cerevisiae	NPL3	Nuclear Protein Localization	1328783
S000002855	YDR447C	S. cerevisiae	RPS17B	Ribosomal Protein of the Small subunit	1354829
S000002862	YDR454C	S. cerevisiae	GUK1	GUanylate Kinase	1366264
S000002868	YDR460W	S. cerevisiae	TFB3	Transcription Factor B subunit 3	1383811
S000002874	YDR466W	S. cerevisiae	PKH3	Pkb-activating Kinase Homolog	1395121
S000002883	YDR475C	S. cerevisiae	JIP4	Jumonji domain Interacting Protein	1407464
S000002888	YDR480W	S. cerevisiae	DIG2	Down-regulator of Invasive Growth	1417399
S000002892	YDR484W	S. cerevisiae	VPS52	Vacuolar Protein Sorting	1422763
S000002893	YDR485C	S. cerevisiae	VPS72	Vacuolar Protein Sorting	1424820
S000002896	YDR488C	S. cerevisiae	PAC11	Perish in the Absence of CIN8	1429188
S000002897	YDR489W	S. cerevisiae	SLD5	Synthetic Lethality with Dpb11-1	1431012
S000002899	YDR491C	S. cerevisiae			1434500
S000002901	YDR493W	S. cerevisiae	MZM1	Mitochondrial Zinc Maintenance	1436217
S000002903	YDR495C	S. cerevisiae	VPS3	Vacuolar Protein Sorting	1438115
S000002925	YDR517W	S. cerevisiae	GRH1	GRasp65 (Golgi reassembly stacking protein of 65kD) Homolog	1477239
S000002930	YDR522C	S. cerevisiae	SPS2	SPorulation Specific	1483795
S000002931	YDR523C	S. cerevisiae	SPS1	SPorulation Specific	1485566
S000028739	YDR524C-B	S. cerevisiae			1489598
S000028740	YDR524W-C	S. cerevisiae			1489403
S000002935	YDR527W	S. cerevisiae	RBA50	RNA polymerase II (B) Associated protein	1491094
S000002940	YDR532C	S. cerevisiae	KRE28		1499396
S000002947	YDR539W	S. cerevisiae	FDC1	Ferulic acid DeCarboxylase	1512094
S000002951	YDR543C	S. cerevisiae			1524634
S000000733	YEL007W	S. cerevisiae	MIT1	Muc1 expressed Independent of TEC1	141892
S000000741	YEL015W	S. cerevisiae	EDC3	Enhancer of mRNA DeCapping	126629
S000000745	YEL019C	S. cerevisiae	MMS21	Methyl MethaneSulfonate sensitivity	120498
S000000752	YEL026W	S. cerevisiae	SNU13	Small NUclear ribonucleoprotein associated	101943
S000000764	YEL038W	S. cerevisiae	UTR4	Unidentified TRanscript	80462
S000000768	YEL042W	S. cerevisiae	GDA1	Guanosine DiphosphatAse	73771
S000000778	YEL052W	S. cerevisiae	AFG1	ATPase Family Gene	56571
S000000779	YEL053C	S. cerevisiae	MAK10	MAintenance of Killer	53901
S000000783	YEL057C	S. cerevisiae	SDD1	Suppressor of Degenerative Death	45020
S000000791	YEL065W	S. cerevisiae	SIT1	Siderophore Iron Transport	27657
S000000794	YEL068C	S. cerevisiae			25646
S000000805	YER003C	S. cerevisiae	PMI40	PhosphoMannose Isomerase	157736
S000000806	YER004W	S. cerevisiae	FMP52	Found in Mitochondrial Proteome	159580
S000000807	YER005W	S. cerevisiae	YND1	Yeast Nucleoside Diphosphatase	160550
S000028745	YER006C-A	S. cerevisiae			164344
S000000810	YER008C	S. cerevisiae	SEC3	SECretory	167808
S000000813	YER011W	S. cerevisiae	TIR1	TIp1-Related	175248
S000000818	YER016W	S. cerevisiae	BIM1	BInding to Microtubules	188277
S000000820	YER018C	S. cerevisiae	SPC25	Spindle Pole Component	191959
S000000824	YER022W	S. cerevisiae	SRB4	Suppressor of RNA polymerase B	198812
S000000834	YER032W	S. cerevisiae	FIR1	Factor Interacting with REF2	215063
S000000836	YER034W	S. cerevisiae			221846
S000000843	YER041W	S. cerevisiae	YEN1		232461
S000000849	YER047C	S. cerevisiae	SAP1	Sin1 Associated Protein	243810
S000000851	YER049W	S. cerevisiae	TPA1	Termination and PolyAdenylation	251728
S000000852	YER050C	S. cerevisiae	RSM18	Ribosomal Small subunit of Mitochondria	253971
S000000854	YER052C	S. cerevisiae	HOM3	HOMoserine requiring	256375
S000000860	YER058W	S. cerevisiae	PET117	PETite colonies	271768
S000028748	YER067C-A	S. cerevisiae			292240
S000000872	YER070W	S. cerevisiae	RNR1	RiboNucleotide Reductase	298950
S000000875	YER073W	S. cerevisiae	ALD5	ALdehyde Dehydrogenase	304030
S000000877	YER075C	S. cerevisiae	PTP3	Protein Tyrosine Phosphatase	308413
S000000879	YER077C	S. cerevisiae	MRX1	Mitochondrial oRganization of gene eXpression (MIOREX)	314534
S000000880	YER078C	S. cerevisiae	ICP55	Intermediate Cleaving Peptidase	316807
S000028546	YER078W-A	S. cerevisiae			318646
S000000888	YER086W	S. cerevisiae	ILV1	IsoLeucine-plus-Valine requiring	328477
S000002128	YER087C-B	S. cerevisiae	SBH1	Sec61 beta homolog 1	332582
S000000889	YER087W	S. cerevisiae	AIM10	Altered Inheritance rate of Mitochondria	330576
S000000894	YER092W	S. cerevisiae	IES5	Ino Eighty Subunit	342855
S000000900	YER098W	S. cerevisiae	UBP9	UBiquitin-specific Protease	355466
S000000906	YER104W	S. cerevisiae	RTT105	Regulator of Ty1 Transposition	366802
S000000907	YER105C	S. cerevisiae	NUP157	NUclear Pore	367838
S000000912	YER110C	S. cerevisiae	KAP123	KAryoPherin	378762
S000000921	YER119C	S. cerevisiae	AVT6	Amino acid Vacuolar Transport	399496
S000000924	YER122C	S. cerevisiae	GLO3	GLyOxalase	402871
S000000935	YER133W	S. cerevisiae	GLC7	GLyCogen	432495
S000000938	YER136W	S. cerevisiae	GDI1	GDP Dissociation Inhibitor	439616
S000000947	YER145C	S. cerevisiae	FTR1	Fe TRansporter	460526
S000028759	YER147C-A	S. cerevisiae			465203
S000000950	YER148W	S. cerevisiae	SPT15	SuPpressor of Ty insertions	465303
S000000953	YER151C	S. cerevisiae	UBP3	UBiquitin-specific Protease	469686
S000000954	YER152C	S. cerevisiae			472657
S000000955	YER153C	S. cerevisiae	PET122	PETite colonies	474041
S000000957	YER155C	S. cerevisiae	BEM2	Bud EMergence	476345
S000000961	YER159C	S. cerevisiae	BUR6	Bypass UAS Requirement	491530
S000000966	YER164W	S. cerevisiae	CHD1	Chromatin organization modifier, Helicase, and DNA-binding domains	505392
S000000967	YER165W	S. cerevisiae	PAB1	Poly(A) Binding protein	510373
S000000970	YER168C	S. cerevisiae	CCA1	tRNA CCA-pyrophosphorylase	521029
S000000975	YER173W	S. cerevisiae	RAD24	RADiation sensitive	536300
S000000976	YER174C	S. cerevisiae	GRX4	GlutaRedoXin	538434
S000000978	YER176W	S. cerevisiae	ECM32	ExtraCellular Mutant	541690
S000000980	YER178W	S. cerevisiae	PDA1	Pyruvate Dehydrogenase Alpha	546817
S000000988	YER186C	S. cerevisiae			561705
S000000989	YER187W	S. cerevisiae			566230
S000001890	YFL004W	S. cerevisiae	VTC2	Vacuolar Transporter Chaperone	131810
S000001885	YFL009W	S. cerevisiae	CDC4	Cell Division Cycle	116145
S000001884	YFL010C	S. cerevisiae	WWM1	WW domain containing protein interacting with Metacaspase	115108
S000001955	YFL010W-A	S. cerevisiae	AUA1	Amino acid Uptake Activation	114990
S000001878	YFL016C	S. cerevisiae	MDJ1	Mitochondrial DnaJ	104701
S000001871	YFL023W	S. cerevisiae	BUD27	BUD site selection	90986
S000001870	YFL024C	S. cerevisiae	EPL1	Enhancer of Polycomb Like	87847
S000001866	YFL028C	S. cerevisiae	CAF16	CCR4 Associated Factor	79344
S000001849	YFL045C	S. cerevisiae	SEC53	SECretory	43628
S000001848	YFL046W	S. cerevisiae	FMP32	Found in Mitochondrial Proteome	42815
S000001847	YFL047W	S. cerevisiae	RGD2	RhoGAP domain	40421
S000001846	YFL048C	S. cerevisiae	EMP47		38843
S000001845	YFL049W	S. cerevisiae	SWP82	SWi/snf-associated Protein	36803
S000001899	YFR003C	S. cerevisiae	YPI1	Yeast Phosphatase Inhibitor	152657
S000001901	YFR005C	S. cerevisiae	SAD1	SnRNP Assembly Defective	154527
S000001902	YFR006W	S. cerevisiae			156145
S000001903	YFR007W	S. cerevisiae	YFH7		159299
S000001910	YFR014C	S. cerevisiae	CMK1	CalModulin dependent protein Kinase	172537
S000001912	YFR016C	S. cerevisiae	AIP5	Actin Interacting Protein	177042
S000001915	YFR019W	S. cerevisiae	FAB1	Forms Aploid and Binucleate cells	184502
S000001918	YFR022W	S. cerevisiae	ROG3	Revertant Of Glycogen synthase kinase mutation	196833
S000001923	YFR027W	S. cerevisiae	ECO1	Establishment of COhesion	207452
S000001928	YFR032C	S. cerevisiae	RRT5	Regulator of rDNA Transcription	222090
S000001931	YFR035C	S. cerevisiae			226121
S000001933	YFR037C	S. cerevisiae	RSC8	Remodel the Structure of Chromatin	227513
S000001942	YFR046C	S. cerevisiae	CNN1	Co-purified with NNf1p	243074
S000001944	YFR048W	S. cerevisiae	RMD8	Required for Meiotic nuclear Division	246146
S000002972	YGL004C	S. cerevisiae	RPN14	Regulatory Particle Non-ATPase	490703
S000002990	YGL022W	S. cerevisiae	STT3	STaurosporine and Temperature sensitive	452404
S000002991	YGL023C	S. cerevisiae	PIB2	PhosphatidylInositol(3)-phosphate Binding	450197
S000002994	YGL026C	S. cerevisiae	TRP5	TRyPtophan	446412
S000002997	YGL029W	S. cerevisiae	CGR1	Coiled-coil Growth-Regulated	440063
S000003005	YGL037C	S. cerevisiae	PNC1	Pyrazinamidase and NiCotinamidase	427297
S000003006	YGL038C	S. cerevisiae	OCH1	Outer CHain elongation	425362
S000003011	YGL043W	S. cerevisiae	DST1	DNA Strand Transfer	417483
S000003012	YGL044C	S. cerevisiae	RNA15	poly(A) mRNA metabolism	416146
S000003013	YGL045W	S. cerevisiae	RIM8	Regulator of IME2	414102
S000003015	YGL047W	S. cerevisiae	ALG13	Asparagine-Linked Glycosylation	411552
S000003026	YGL058W	S. cerevisiae	RAD6	RADiation sensitive	393986
S000003028	YGL060W	S. cerevisiae	YBP2	Yap1-Binding Protein	390065
S000003031	YGL063W	S. cerevisiae	PUS2	PseudoUridine Synthase	383654
S000003032	YGL064C	S. cerevisiae	MRH4	Mitochondrial RNA Helicase	381523
S000003043	YGL075C	S. cerevisiae	MPS2	MonoPolar Spindle	366925
S000003044	YGL076C	S. cerevisiae	RPL7A	Ribosomal Protein of the Large subunit	364335
S000003047	YGL079W	S. cerevisiae	KXD1	KxDL homolog	359444
S000003056	YGL088W	S. cerevisiae			345836
S000003057	YGL089C	S. cerevisiae	MF(ALPHA)2	Mating Factor ALPHA	344791
S000003060	YGL092W	S. cerevisiae	NUP145	NUclear Pore	337906
S000003061	YGL093W	S. cerevisiae	SPC105	Spindle Pole Component	334886
S000003063	YGL095C	S. cerevisiae	VPS45	Vacuolar Protein Sorting	328874
S000003065	YGL097W	S. cerevisiae	SRM1	Suppressor of Receptor Mutations	321782
S000003067	YGL099W	S. cerevisiae	LSG1	Large-Subunit Gtpase	314631
S000003071	YGL103W	S. cerevisiae	RPL28	Ribosomal Protein of the Large subunit	310967
S000003074	YGL106W	S. cerevisiae	MLC1	Myosin Light Chain	306560
S000003075	YGL107C	S. cerevisiae	RMD9	Required for Meiotic nuclear Division	304333
S000003077	YGL109W	S. cerevisiae			303513
S000003078	YGL110C	S. cerevisiae	CUE3	Coupling of Ubiquitin conjugation to ER degradation	301537
S000003079	YGL111W	S. cerevisiae	NSA1	Nop Seven Associated	299978
S000003080	YGL112C	S. cerevisiae	TAF6	TATA binding protein-Associated Factor	298178
S000003087	YGL119W	S. cerevisiae	COQ8	COenzyme Q	284442
S000003095	YGL127C	S. cerevisiae	SOH1	Suppressor Of Hpr1	270392
S000003097	YGL129C	S. cerevisiae	RSM23	Ribosomal Small subunit of Mitochondria	267723
S000003103	YGL135W	S. cerevisiae	RPL1B	Ribosomal Protein of the Large subunit	254641
S000003105	YGL137W	S. cerevisiae	SEC27	SECretory	249869
S000003117	YGL149W	S. cerevisiae			225572
S000003121	YGL153W	S. cerevisiae	PEX14	PEroXisome related	216273
S000003122	YGL154C	S. cerevisiae	LYS5	LYSine requiring	215278
S000003131	YGL163C	S. cerevisiae	RAD54	RADiation sensitive	193707
S000003142	YGL174W	S. cerevisiae	BUD13	BUD site selection	174545
S000003143	YGL175C	S. cerevisiae	SAE2	Sporulation in the Absence of spo Eleven	173285
S000003144	YGL176C	S. cerevisiae			171415
S000003146	YGL178W	S. cerevisiae	MPT5	Multicopy suppressor of Pop Two	167352
S000003147	YGL179C	S. cerevisiae	TOS3	Target Of Sbf	163409
S000003151	YGL183C	S. cerevisiae	MND1	Meiotic Nuclear Divisions	156543
S000003160	YGL192W	S. cerevisiae	IME4	Inducer of MEiosis	142246
S000003161	YGL193C	S. cerevisiae			141916
S000003162	YGL194C	S. cerevisiae	HOS2	Hda One Similar	140368
S000003168	YGL200C	S. cerevisiae	EMP24	EndoMembrane Protein	122694
S000003171	YGL203C	S. cerevisiae	KEX1	Killer EXpression defective	112475
S000003178	YGL210W	S. cerevisiae	YPT32	Yeast Protein Two	93792
S000003179	YGL211W	S. cerevisiae	NCS6	Needs Cla4 to Survive	92512
S000003190	YGL222C	S. cerevisiae	EDC1	Enhancer of mRNA DeCapping	80659
S000003192	YGL224C	S. cerevisiae	SDT1	Suppressor of Disruption of TFIIS	78015
S000003195	YGL226W	S. cerevisiae	MTC3	Maintenance of Telomere Capping	73340
S000003201	YGL232W	S. cerevisiae	TAN1	Trna AcetylatioN	62075
S000003202	YGL233W	S. cerevisiae	SEC15	SECretory	59122
S000003211	YGL242C	S. cerevisiae			44652
S000003213	YGL244W	S. cerevisiae	RTF1	Restores TBP Function	41498
S000003215	YGL246C	S. cerevisiae	RAI1	Rat1p Interacting Protein	37617
S000003216	YGL247W	S. cerevisiae	BRR6	Bad Response to Refrigeration	36933
S000003222	YGL253W	S. cerevisiae	HXK2	HeXoKinase	23935
S000003225	YGL256W	S. cerevisiae	ADH4	Alcohol DeHydrogenase	15159
S000003234	YGR002C	S. cerevisiae	SWC4	SWr Complex	498476
S000003245	YGR013W	S. cerevisiae	SNU71	Small NUclear ribonucleoprotein associated	514554
S000003246	YGR014W	S. cerevisiae	MSB2	Multicopy Suppression of a Budding defect	516943
S000003252	YGR020C	S. cerevisiae	VMA7	Vacuolar Membrane Atpase	526973
S000003260	YGR028W	S. cerevisiae	MSP1	Mitochondrial Sorting of Proteins	542203
S000003261	YGR029W	S. cerevisiae	ERV1	Essential for Respiration and Viability	543553
S000003262	YGR030C	S. cerevisiae	POP6	Processing Of Precursor RNAs	545681
S000003267	YGR035C	S. cerevisiae			557072
S000028827	YGR035W-A	S. cerevisiae			557565
S000003269	YGR037C	S. cerevisiae	ACB1	Acyl-CoA-Binding	559731
S000003272	YGR040W	S. cerevisiae	KSS1	Kinase Suppressor of Sst2 mutations	575398
S000003276	YGR044C	S. cerevisiae	RME1	Regulator of MEiosis	582990
S000003279	YGR047C	S. cerevisiae	TFC4	Transcription Factor class C	586392
S000003288	YGR056W	S. cerevisiae	RSC1	Remodel the Structure of Chromatin	601661
S000003290	YGR058W	S. cerevisiae	PEF1	Penta-EF-Hand protein	606136
S000003299	YGR067C	S. cerevisiae			622372
S000003302	YGR070W	S. cerevisiae	ROM1	RhO1 Multicopy suppressor	627806
S000003304	YGR072W	S. cerevisiae	UPF3	UP Frameshift	634304
S000003306	YGR074W	S. cerevisiae	SMD1	snRNA Sm binding site protein D1	635712
S000003308	YGR076C	S. cerevisiae	MRPL25	Mitochondrial Ribosomal Protein, Large subunit	637104
S000003315	YGR083C	S. cerevisiae	GCD2	General Control Derepressed	644860
S000003324	YGR092W	S. cerevisiae	DBF2	DumbBell Former	668189
S000003325	YGR093W	S. cerevisiae	DRN1	Debranching enzyme-associated RiboNuclease	670388
S000003329	YGR097W	S. cerevisiae	ASK10	Activator of SKn7	678695
S000003334	YGR102C	S. cerevisiae	GTF1	Glutaminyl Transamidase subunit F	694584
S000003336	YGR104C	S. cerevisiae	SRB5	Suppressor of RNA polymerase B	697445
S000003344	YGR112W	S. cerevisiae	SHY1	SURF Homolog of Yeast	717358
S000003350	YGR118W	S. cerevisiae	RPS23A	Ribosomal Protein of the Small subunit	726974
S000003352	YGR120C	S. cerevisiae	COG2	Conserved Oligomeric Golgi complex	730033
S000003357	YGR125W	S. cerevisiae	VSB1	Vacuolar Storage of Basic amino acids	742325
S000003365	YGR133W	S. cerevisiae	PEX4	PEroXin	756896
S000003366	YGR134W	S. cerevisiae	CAF130	CCR4 Associated Factor	757770
S000003369	YGR137W	S. cerevisiae			762888
S000003374	YGR142W	S. cerevisiae	BTN2	BaTteN disease	772454
S000003376	YGR144W	S. cerevisiae	THI4	THIamine metabolism	780399
S000003378	YGR146C	S. cerevisiae	ECL1	Extends Chronological Lifespan	784223
S000028638	YGR146C-A	S. cerevisiae			785276
S000003379	YGR147C	S. cerevisiae	NAT2	N-terminal AcetylTransferase	786054
S000003380	YGR148C	S. cerevisiae	RPL24B	Ribosomal Protein of the Large subunit	787312
S000003384	YGR152C	S. cerevisiae	RSR1	RaS-Related	794674
S000003394	YGR162W	S. cerevisiae	TIF4631	Translation Initiation Factor	824059
S000003397	YGR165W	S. cerevisiae	MRPS35	Mitochondrial Ribosomal Protein, Small subunit	829116
S000003399	YGR167W	S. cerevisiae	CLC1	Clathrin Light Chain	832456
S000003401	YGR169C	S. cerevisiae	PUS6	PseudoUridine Synthase	834689
S000028521	YGR169C-A	S. cerevisiae	LSO2	Late-annotated Small Open reading frame	836387
S000003405	YGR173W	S. cerevisiae	RBG2	RiBosome interacting Gtpase	843854
S000003408	YGR176W	S. cerevisiae			848720
S000003411	YGR179C	S. cerevisiae	OKP1	Outer Kinetochore Protein	853675
S000003413	YGR181W	S. cerevisiae	TIM13	Translocase of the Inner Mitochondrial membrane	858287
S000003421	YGR189C	S. cerevisiae	CRH1	Congo Red Hypersensitive	876669
S000003426	YGR194C	S. cerevisiae	XKS1	XyluloKinaSe	886073
S000003431	YGR199W	S. cerevisiae	PMT6	Protein O-MannosylTransferase	897502
S000003433	YGR201C	S. cerevisiae			902520
S000003434	YGR202C	S. cerevisiae	PCT1	Phosphocholine CytidylylTransferase	903474
S000028640	YGR204C-A	S. cerevisiae			909061
S000003438	YGR206W	S. cerevisiae	MVB12	MultiVesicular Body sorting factor of 12 kilodaltons	910432
S000003441	YGR209C	S. cerevisiae	TRX2	ThioRedoXin	912913
S000003447	YGR215W	S. cerevisiae	RSM27	Ribosomal Small subunit of Mitochondria	922175
S000003449	YGR217W	S. cerevisiae	CCH1	Calcium Channel Homolog	924696
S000003451	YGR219W	S. cerevisiae			936035
S000003452	YGR220C	S. cerevisiae	MRPL9	Mitochondrial Ribosomal Protein, Large subunit	936074
S000003454	YGR222W	S. cerevisiae	PET54	PETite colonies	939923
S000003456	YGR224W	S. cerevisiae	AZR1	Acetic Acid and AZoles Resistance	942806
S000003461	YGR229C	S. cerevisiae	SMI1	Suppressor of MAR Inhibitor	949382
S000003467	YGR235C	S. cerevisiae	MIC26	MItochondrial contact site and Cristae organizing system	961360
S000003470	YGR238C	S. cerevisiae	KEL2	KELch repeat	966039
S000003471	YGR239C	S. cerevisiae	PEX21	PEroXin	969187
S000003472	YGR240C	S. cerevisiae	PFK1	PhosphoFructoKinase	970771
S000003477	YGR245C	S. cerevisiae	SDA1	Severe Depolymerization of Actin	979765
S000003478	YGR246C	S. cerevisiae	BRF1	B-Related Factor	982482
S000003481	YGR249W	S. cerevisiae	MGA1		988049
S000003482	YGR250C	S. cerevisiae	RIE1	Restoration of Impaired growths of ERMES-lacking cells	991176
S000003489	YGR257C	S. cerevisiae	MTM1	Manganese Trafficking factor for Mitochondrial SOD2	1006205
S000003497	YGR265W	S. cerevisiae			1021648
S000003509	YGR277C	S. cerevisiae	CAB4	Coenzyme A Biosynthesis	1045644
S000003517	YGR285C	S. cerevisiae	ZUO1	ZUOtin	1061852
S000000994	YHL002W	S. cerevisiae	HSE1	Has Symptoms of class E mutants
S000000996	YHL004W	S. cerevisiae	MRP4	Mitochondrial Ribosomal Protein	99219
S000000999	YHL007C	S. cerevisiae	STE20	STErile	95118
S000001009	YHL017W	S. cerevisiae			70276
S000001011	YHL019C	S. cerevisiae	APM2	clathrin Adaptor Protein complex Medium chain	67731
S000001014	YHL022C	S. cerevisiae	SPO11	SPOrulation	62961
S000028773	YHL030W-A	S. cerevisiae			39074
S000001031	YHL039W	S. cerevisiae	EFM1	Elongation Factor Methyltransferase	21783
S000001040	YHL048W	S. cerevisiae	COS8	COnserved Sequence	6401
S000001044	YHR002W	S. cerevisiae	LEU5	LEUcine biosynthesis	108812
S000001046	YHR004C	S. cerevisiae	NEM1	Nuclear Envelope Morphology	111754
S000001047	YHR005C	S. cerevisiae	GPA1	G Protein Alpha subunit	113499
S000001048	YHR006W	S. cerevisiae	STP2	protein with similarity to Stp1p	117814
S000001059	YHR017W	S. cerevisiae	YSC83		138694
S000001060	YHR018C	S. cerevisiae	ARG4	ARGinine requiring	140011
S000028776	YHR028W-A	S. cerevisiae			167352
S000001072	YHR030C	S. cerevisiae	SLT2	Suppressor of the LyTic phenotype	168890
S000001075	YHR033W	S. cerevisiae			175548
S000001076	YHR034C	S. cerevisiae	PIH1	Protein Interacting with Hsp90	176965
S000001082	YHR040W	S. cerevisiae	BCD1	Box C/D snoRNA accumulation	187924
S000001085	YHR043C	S. cerevisiae	DOG2	DeOxyGlucose	192805
S000001086	YHR044C	S. cerevisiae	DOG1	DeOxyGlucose	194068
S000001091	YHR049W	S. cerevisiae	FSH1	Family of Serine Hydrolases	206462
S000001105	YHR063C	S. cerevisiae	PAN5	PANtothenate biosynthesis	224030
S000001110	YHR068W	S. cerevisiae	DYS1	DeoxyhYpusine Synthase	232133
S000001111	YHR069C	S. cerevisiae	RRP4	Ribosomal RNA Processing	233579
S000001112	YHR070W	S. cerevisiae	TRM5	tRNA Methyltransferase	234881
S000001115	YHR073W	S. cerevisiae	OSH3	OxySterol binding protein Homolog	242582
S000001118	YHR076W	S. cerevisiae	PTC7	Phosphatase type Two C	251101
S000001119	YHR077C	S. cerevisiae	NMD2	Nonsense-mediated MRNA Decay	252374
S000001121	YHR079C	S. cerevisiae	IRE1	Inositol REquiring	258244
S000001127	YHR085W	S. cerevisiae	IPI1	Involved in Processing ITS2	276764
S000001133	YHR091C	S. cerevisiae	MSR1	Mitochondrial tRNA Synthetase aRginine	284839
S000001142	YHR100C	S. cerevisiae	GEP4	GEnetic interactors of Prohibitins	314116
S000001145	YHR103W	S. cerevisiae	SBE22	similar to SBE2	320414
S000001147	YHR105W	S. cerevisiae	YPT35		324766
S000001149	YHR107C	S. cerevisiae	CDC12	Cell Division Cycle	326813
S000001150	YHR108W	S. cerevisiae	GGA2	Golgi-localized, Gamma-adaptin ear homology, Arf-binding protein	328303
S000001153	YHR111W	S. cerevisiae	UBA4	UBiquitin-Activating	333072
S000001157	YHR115C	S. cerevisiae	DMA1	Defective in Mitotic Arrest	340109
S000001161	YHR119W	S. cerevisiae	SET1	SET domain-containing	346043
S000001162	YHR120W	S. cerevisiae	MSH1	MutS Homolog	349574
S000001164	YHR122W	S. cerevisiae	CIA2	Cytosolic Iron-sulfur protein Assembly	353625
S000001191	YHR148W	S. cerevisiae	IMP3	Interacting with Mpp10p	393534
S000001192	YHR149C	S. cerevisiae	SKG6	Suppressor of lethality of Kex2 Gas1 double null mutant	394455
S000001195	YHR152W	S. cerevisiae	SPO12	SPOrulation	401434
S000001199	YHR156C	S. cerevisiae	LIN1	LINk	411384
S000001200	YHR157W	S. cerevisiae	REC104	RECombination	412907
S000001210	YHR167W	S. cerevisiae	THP2	THO2 - HPR1 Phenotype	439342
S000001212	YHR169W	S. cerevisiae	DBP8	Dead Box Protein	442181
S000028553	YHR175W-A	S. cerevisiae			453558
S000001221	YHR178W	S. cerevisiae	STB5	Sin Three Binding protein	459299
S000001224	YHR181W	S. cerevisiae	SVP26	Sed5 Vesicle Protein	467228
S000001238	YHR195W	S. cerevisiae	NVJ1	Nucleus-Vacuole Junction	490747
S000001239	YHR196W	S. cerevisiae	UTP9	U Three Protein	491931
S000001242	YHR199C	S. cerevisiae	AIM46	Altered Inheritance rate of Mitochondria	497490
S000001249	YHR206W	S. cerevisiae	SKN7	Suppressor of Kre Null	512732
S000001266	YIL004C	S. cerevisiae	BET1	Blocked Early in Transport	347946
S000001267	YIL005W	S. cerevisiae	EPS1	ER-retained Pma1 Suppressing	345692
S000006432	YIL009C-A	S. cerevisiae	EST3	Ever Shorter Telomeres	335666
S000001271	YIL009W	S. cerevisiae	FAA3	Fatty Acid Activation	339344
S000001272	YIL010W	S. cerevisiae	DOT5	Disruptor Of Telomeric silencing	334882
S000001278	YIL016W	S. cerevisiae	SNL1	Suppressor of Nup116-C Lethal	321454
S000001281	YIL019W	S. cerevisiae	FAF1	Forty (40) S Assembly Factor	315093
S000001283	YIL021W	S. cerevisiae	RPB3	RNA Polymerase B	312905
S000001289	YIL027C	S. cerevisiae	EMC5	ER Membrane protein Complex	303679
S000001290	YIL028W	S. cerevisiae			302100
S000001295	YIL033C	S. cerevisiae	BCY1	Bypass of CYclic-AMP requirement	290419
S000001296	YIL034C	S. cerevisiae	CAP2	CAPping	289226
S000001297	YIL035C	S. cerevisiae	CKA1	Casein Kinase Alpha subunit	287790
S000001305	YIL043C	S. cerevisiae	CBR1	Cytochrome b Reductase	274072
S000001307	YIL045W	S. cerevisiae	PIG2	Protein Interacting with Gsy2p	271161
S000001312	YIL050W	S. cerevisiae	PCL7	Pho85 CycLin	258913
S000001325	YIL063C	S. cerevisiae	YRB2	Yeast Ran Binder	242761
S000001332	YIL070C	S. cerevisiae	MAM33	Mitochondrial Acidic Matrix protein	230272
S000001346	YIL084C	S. cerevisiae	SDS3	Suppressor of Defective Silencing	202276
S000001347	YIL085C	S. cerevisiae	KTR7	Kre Two Related	200490
S000001348	YIL086C	S. cerevisiae			200153
S000001352	YIL090W	S. cerevisiae	ICE2	Inheritance of Cortical ER	193595
S000001360	YIL098C	S. cerevisiae	FMC1	Formation of Mitochondrial Complexes	179772
S000001366	YIL104C	S. cerevisiae	SHQ1	Small nucleolar RNAs of the box H/ACA family Quantitative accumulation	169982
S000001368	YIL106W	S. cerevisiae	MOB1	Mps One Binder	166415
S000001373	YIL111W	S. cerevisiae	COX5B	Cytochrome c OXidase	155222
S000001374	YIL112W	S. cerevisiae	HOS4	Hda One Similar	151595
S000001380	YIL118W	S. cerevisiae	RHO3	Ras HOmolog	139752
S000001385	YIL123W	S. cerevisiae	SIM1	Start Independent of Mitosis	128151
S000001400	YIL138C	S. cerevisiae	TPM2	TroPoMyosin	89230
S000001402	YIL140W	S. cerevisiae	AXL2	AXiaL 2 bud site selection	85366
S000001405	YIL143C	S. cerevisiae	SSL2	Suppressor of Stem-Loop mutation	80510
S000001409	YIL147C	S. cerevisiae	SLN1	Synthetic Lethal of N-end rule	69791
S000001410	YIL148W	S. cerevisiae	RPL40A	Ribosomal Protein of the Large subunit	68708
S000001415	YIL153W	S. cerevisiae	RRD1	Resistant to Rapamycin Deletion	55198
S000001416	YIL154C	S. cerevisiae	IMP2'	Independent of Mitochondrial Particle	53981
S000001419	YIL157C	S. cerevisiae	COA1	Cytochrome Oxidase Assembly	46949
S000001421	YIL159W	S. cerevisiae	BNR1	BNi1 Related	41825
S000001440	YIR001C	S. cerevisiae	SGN1	Slower Growth on Non-fermentable carbon sources	356143
S000001442	YIR003W	S. cerevisiae	AIM21	Altered Inheritance rate of Mitochondria	360885
S000001444	YIR005W	S. cerevisiae	IST3	Increased Sodium Tolerance	364889
S000001446	YIR007W	S. cerevisiae	EGH1	Cryptococcus neoformans EGCrP2 Homolog	370704
S000028837	YIR018C-A	S. cerevisiae			385564
S000001457	YIR018W	S. cerevisiae	YAP5	Yeast AP-1	384609
S000001460	YIR021W	S. cerevisiae	MRS1	Mitochondrial RNA Splicing	397294
S000028801	YIR023C-A	S. cerevisiae			402383
S000001463	YIR024C	S. cerevisiae	INA22	INner membrane Assembly 22 kDa	402841
S000001478	YIR039C	S. cerevisiae	YPS6	YaPSin	430498
S000003540	YJL003W	S. cerevisiae	COX16	Cytochrome c OXidase	432644
S000003543	YJL006C	S. cerevisiae	CTK2	Carboxy-Terminal domain Kinase	423138
S000003544	YJL007C	S. cerevisiae			422698
S000003550	YJL013C	S. cerevisiae	MAD3	Mitotic Arrest-Deficient	409493
S000003571	YJL034W	S. cerevisiae	KAR2	KARyogamy	381327
S000003579	YJL043W	S. cerevisiae			360130
S000003580	YJL044C	S. cerevisiae	GYP6	Gtpase-activating protein of Ypt6 Protein	358300
S000003581	YJL045W	S. cerevisiae	SDH9	Succinate DeHydrogenase	356024
S000003582	YJL046W	S. cerevisiae	AIM22	Altered Inheritance rate of Mitochondria	352386
S000003587	YJL051W	S. cerevisiae	IRC8	Increased Recombination Centers	339787
S000003590	YJL054W	S. cerevisiae	TIM54	Translocase of the Inner Mitochondrial membrane	334265
S000007611	YJL062W-A	S. cerevisiae	COA3	Cytochrome Oxidase Assembly	316723
S000003601	YJL065C	S. cerevisiae	DLS1	Dpb3-Like Subunit of ISW2/yCHRAC complex	315054
S000003610	YJL074C	S. cerevisiae	SMC3	Stability of MiniChromosomes	299157
S000003612	YJL076W	S. cerevisiae	NET1	Nucleolar silencing Establishing factor and Telophase regulator	295245
S000003613	YJL077C	S. cerevisiae	ICS3	Increased Copper Sensitivity	294666
S000003619	YJL083W	S. cerevisiae	TAX4		278841
S000003621	YJL085W	S. cerevisiae	EXO70	EXOcyst	272827
S000003622	YJL086C	S. cerevisiae			272478
S000003627	YJL091C	S. cerevisiae	GWT1	GPI-anchored Wall protein Transfer	261080
S000003628	YJL092W	S. cerevisiae	SRS2	Suppressor of Rad Six	257423
S000003629	YJL093C	S. cerevisiae	TOK1		254737
S000003631	YJL095W	S. cerevisiae	BCK1	Bypass of C Kinase	247255
S000003632	YJL096W	S. cerevisiae	MRPL49	Mitochondrial Ribosomal Protein, Large subunit	246490
S000003633	YJL097W	S. cerevisiae	PHS1	PTPLA Homolog involved in Sphingolipid biosynthesis 1	245591
S000003642	YJL106W	S. cerevisiae	IME2	Inducer of MEiosis	221390
S000003648	YJL112W	S. cerevisiae	MDV1	Mitochondrial DiVision	205305
S000003649	YJL113W	S. cerevisiae			198678
S000003651	YJL115W	S. cerevisiae	ASF1	Anti-Silencing Function	196287
S000003659	YJL123C	S. cerevisiae	MTC1	Maintenance of Telomere Capping	188004
S000003662	YJL126W	S. cerevisiae	NIT2	NITrilase superfamily	184501
S000003665	YJL129C	S. cerevisiae	TRK1	TRansport of potassium (K)	173599
S000003666	YJL130C	S. cerevisiae	URA2	URAcil requiring	165723
S000003667	YJL131C	S. cerevisiae	AIM23	Altered Inheritance rate of Mitochondria	164278
S000003669	YJL133W	S. cerevisiae	MRS3	Mitochondrial RNA Splicing	160619
S000003675	YJL139C	S. cerevisiae	YUR1	Yeast Unknown Reading frame	151713
S000003684	YJL148W	S. cerevisiae	RPA34	RNA Polymerase A	140437
S000003692	YJL156C	S. cerevisiae	SSY5	Sulfonylurea Sensitive on YPD	126853
S000007613	YJL156W-A	S. cerevisiae			126604
S000003693	YJL157C	S. cerevisiae	FAR1	Factor ARrest	123836
S000003700	YJL164C	S. cerevisiae	TPK1	Takashi's Protein Kinase	109966
S000003701	YJL165C	S. cerevisiae	HAL5	HALotolerance	106894
S000003704	YJL168C	S. cerevisiae	SET2	SET domain-containing	102227
S000003710	YJL174W	S. cerevisiae	KRE9	Killer toxin REsistant	95092
S000003733	YJL197W	S. cerevisiae	UBP12	UBiquitin-specific Protease	63805
S000003736	YJL200C	S. cerevisiae	ACO2	ACOnitase	56444
S000003738	YJL202C	S. cerevisiae			53943
S000003739	YJL203W	S. cerevisiae	PRP21	Pre-mRNA Processing	53341
S000003744	YJL208C	S. cerevisiae	NUC1	NUClease	40194
S000003745	YJL209W	S. cerevisiae	CBP1	Cytochrome B mRNA Processing	38005
S000003769	YJR009C	S. cerevisiae	TDH2	Triose-phosphate DeHydrogenase	453683
S000003775	YJR014W	S. cerevisiae	TMA22	Translation Machinery Associated	461829
S000003776	YJR015W	S. cerevisiae			462721
S000003778	YJR017C	S. cerevisiae	ESS1	ESSential	466521
S000003792	YJR031C	S. cerevisiae	GEA1	Guanine nucleotide Exchange on ARF	486586
S000003795	YJR034W	S. cerevisiae	PET191	PETite colonies	496683
S000003800	YJR039W	S. cerevisiae	MLO127	Mitochondrially LOcalized protein of 127 kDa	503936
S000003812	YJR051W	S. cerevisiae	OSM1	OSMotic sensitivity	529861
S000003813	YJR052W	S. cerevisiae	RAD7	RADiation sensitive	532062
S000003816	YJR055W	S. cerevisiae	HIT1	HIgh Temperature growth	538772
S000003820	YJR059W	S. cerevisiae	PTK2	Putative serine/Threonine protein Kinase	545787
S000003821	YJR060W	S. cerevisiae	CBF1	Centromere Binding Factor	548759
S000003826	YJR065C	S. cerevisiae	ARP3	Actin-Related Protein	557809
S000003827	YJR066W	S. cerevisiae	TOR1	Target Of Rapamycin	559416
S000003828	YJR067C	S. cerevisiae	YAE1		567019
S000003829	YJR068W	S. cerevisiae	RFC2	Replication Factor C	567643
S000003833	YJR072C	S. cerevisiae	NPA3	Nucleolar Preribosomal Associated	570967
S000003836	YJR075W	S. cerevisiae	HOC1	Homologous to OCh1	573981
S000003839	YJR078W	S. cerevisiae	BNA2	Biosynthesis of Nicotinic Acid	578860
S000003841	YJR080C	S. cerevisiae	AIM24	Altered Inheritance rate of Mitochondria	580432
S000003846	YJR086W	S. cerevisiae	STE18	STErile	586068
S000003848	YJR088C	S. cerevisiae	EMC2	ER Membrane protein Complex	586495
S000003849	YJR089W	S. cerevisiae	BIR1	Baculoviral IAP Repeat-containing protein	587718
S000003851	YJR091C	S. cerevisiae	JSN1	Just Say No	595061
S000003852	YJR092W	S. cerevisiae	BUD4	BUD site selection	598735
S000003858	YJR097W	S. cerevisiae	JJJ3	J-protein (Type III)	612413
S000003859	YJR098C	S. cerevisiae			613186
S000003862	YJR101W	S. cerevisiae	RSM26	Ribosomal Small subunit of Mitochondria	618234
S000003863	YJR102C	S. cerevisiae	VPS25	Vacuolar Protein Sorting	619157
S000003870	YJR109C	S. cerevisiae	CPA2	Carbamyl Phosphate synthetase A	629585
S000003871	YJR110W	S. cerevisiae	YMR1	Yeast Myotubularin Related	633615
S000028513	YJR112W-A	S. cerevisiae			637790
S000003880	YJR119C	S. cerevisiae	JHD2	JmjC domain-containing Histone Demethylase	644304
S000003881	YJR120W	S. cerevisiae			647126
S000003883	YJR122W	S. cerevisiae	IBA57	Iron-sulfur cluster assembly factor for Biotin synthase and Aconitase-like mitochondrial proteins	649776
S000003887	YJR126C	S. cerevisiae	VPS70	Vacuolar Protein Sorting	656254
S000003901	YJR140C	S. cerevisiae	HIR3	HIstone Regulation	690750
S000003903	YJR142W	S. cerevisiae			697141
S000003913	YJR152W	S. cerevisiae	DAL5	Degradation of Allantoin	719666
S000003915	YJR154W	S. cerevisiae			725784
S000001494	YKL011C	S. cerevisiae	CCE1	Cruciform Cutting Endonuclease	420155
S000001495	YKL012W	S. cerevisiae	PRP40	Pre-mRNA Processing	418310
S000001497	YKL014C	S. cerevisiae	URB1	Unhealthy Ribosome Biogenesis	411619
S000001500	YKL017C	S. cerevisiae	HCS1	dna HeliCaSe	405190
S000001504	YKL021C	S. cerevisiae	MAK11	MAintenance of Killer	397344
S000001506	YKL023W	S. cerevisiae	SKA1	SKi Associated factor	393721
S000001512	YKL029C	S. cerevisiae	MAE1	MAlic Enzyme	382716
S000001514	YKL031W	S. cerevisiae			382072
S000007242	YKL033W-A	S. cerevisiae			374505
S000001524	YKL041W	S. cerevisiae	VPS24	Vacuolar Protein Sorting	360143
S000001525	YKL042W	S. cerevisiae	SPC42	Spindle Pole Component	358475
S000001550	YKL067W	S. cerevisiae	YNK1	Yeast Nucleoside diphosphate Kinase	314812
S000001551	YKL068W	S. cerevisiae	NUP100	NUclear Pore	310199
S000001553	YKL070W	S. cerevisiae			306211
S000001554	YKL071W	S. cerevisiae			305114
S000001556	YKL073W	S. cerevisiae	LHS1	Lumenal Hsp Seventy	296430
S000001557	YKL074C	S. cerevisiae	MUD2	Mutant U1 Die	294610
S000001562	YKL079W	S. cerevisiae	SMY1	Suppressor of MYo2-66	286603
S000001564	YKL081W	S. cerevisiae	TEF4	Translation Elongation Factor	282891
S000001565	YKL082C	S. cerevisiae	RRP14	Ribosomal RNA Processing	281025
S000001571	YKL088W	S. cerevisiae	CAB3	Coenzyme A Biosynthesis	275283
S000001573	YKL090W	S. cerevisiae	CUE2	Coupling of Ubiquitin conjugation to ER degradation	271878
S000001577	YKL094W	S. cerevisiae	YJU3		263349
S000001578	YKL095W	S. cerevisiae	YJU2		262277
S000028667	YKL096C-B	S. cerevisiae			259073
S000001580	YKL097C	S. cerevisiae			258503
S000001582	YKL099C	S. cerevisiae	UTP11	U Three Protein	255720
S000001589	YKL106W	S. cerevisiae	AAT1	Aspartate AminoTransferase	237536
S000001591	YKL108W	S. cerevisiae	SLD2	Synthetically Lethal with Dpb11-1	234426
S000001597	YKL114C	S. cerevisiae	APN1	APurinic/apyrimidinic eNdonuclease	223352
S000001598	YKL115C	S. cerevisiae			222893
S000001604	YKL121W	S. cerevisiae	DGR2	2-Deoxy-Glucose Resistant 2	214142
S000001608	YKL125W	S. cerevisiae	RRN3	Regulation of RNA polymerase I	208247
S000001611	YKL128C	S. cerevisiae	PMU1	PhosphoMUtase	200884
S000001613	YKL130C	S. cerevisiae	SHE2	Swi5p-dependent HO Expression	195288
S000001616	YKL133C	S. cerevisiae	RCI50	Respiratory Chain Interacting protein of ~50 kDa	191679
S000001618	YKL135C	S. cerevisiae	APL2	clathrin Adaptor Protein complex Large chain	186460
S000001621	YKL138C	S. cerevisiae	MRPL31	Mitochondrial Ribosomal Protein, Large subunit	185286
S000001622	YKL139W	S. cerevisiae	CTK1	Carboxy-Terminal domain Kinase	182958
S000001625	YKL142W	S. cerevisiae	MRP8	Mitochondrial Ribosomal Protein	178515
S000001627	YKL144C	S. cerevisiae	RPC25	RNA Polymerase C	175843
S000001635	YKL152C	S. cerevisiae	GPM1	Glycerate PhosphoMutase	163642
S000001639	YKL156W	S. cerevisiae	RPS27A	Ribosomal Protein of the Small subunit	158613
S000001647	YKL164C	S. cerevisiae	PIR1	Protein containing Internal Repeats	141794
S000001649	YKL166C	S. cerevisiae	TPK3	Takashi's Protein Kinase	134509
S000001681	YKL198C	S. cerevisiae	PTK1	Putative serine/Threonine protein Kinase	68232
S000001687	YKL204W	S. cerevisiae	EAP1	EIF4E-Associated Protein	53704
S000001688	YKL205W	S. cerevisiae	LOS1	Loss Of Suppression	50051
S000001689	YKL206C	S. cerevisiae	ADD66	Alpha1-proteinase inhibitor-Degradation Deficient	49006
S000001690	YKL207W	S. cerevisiae	EMC3	ER Membrane protein Complex	48194
S000001691	YKL208W	S. cerevisiae	CBT1	Cytochrome B Termination	47157
S000001692	YKL209C	S. cerevisiae	STE6	STErile	42423
S000001694	YKL211C	S. cerevisiae	TRP3	TRyPtophan	36699
S000001696	YKL213C	S. cerevisiae	DOA1	Degradation Of Alpha	31960
S000001697	YKL214C	S. cerevisiae	YRA2	Yeast RNA Annealing protein	31082
S000001702	YKL219W	S. cerevisiae	COS9	COnserved Sequence	14485
S000001710	YKR002W	S. cerevisiae	PAP1	Poly(A) Polymerase	443232
S000001711	YKR003W	S. cerevisiae	OSH6	OxySterol binding protein Homolog	445381
S000001714	YKR006C	S. cerevisiae	MRPL13	Mitochondrial Ribosomal Protein, Large subunit	450423
S000001716	YKR008W	S. cerevisiae	RSC4	Remodel the Structure of Chromatin	452201
S000001719	YKR011C	S. cerevisiae			461635
S000001727	YKR019C	S. cerevisiae	IRS4	Increased rDNA Silencing	476216
S000001728	YKR020W	S. cerevisiae	VPS51	Vacuolar Protein Sorting	478338
S000001729	YKR021W	S. cerevisiae	ALY1	Arrestin-Like Yeast protein	479234
S000001730	YKR022C	S. cerevisiae	NTR2	NineTeen complex Related protein	482171
S000001731	YKR023W	S. cerevisiae	RQT4	Ribosome-Quality control Trigger factor	483419
S000001732	YKR024C	S. cerevisiae	DBP7	Dead Box Protein	485144
S000001735	YKR027W	S. cerevisiae	BCH2	Bud7 and Chs6 Homolog	491364
S000001737	YKR029C	S. cerevisiae	SET3	SET domain-containing	497578
S000001740	YKR032W	S. cerevisiae			506517
S000001744	YKR036C	S. cerevisiae	CAF4	CCR4 Associated Factor	508702
S000001745	YKR037C	S. cerevisiae	SPC34	Spindle Pole Component	510910
S000001749	YKR041W	S. cerevisiae			518198
S000001750	YKR042W	S. cerevisiae	UTH1	yoUTH	519527
S000001752	YKR044W	S. cerevisiae	UIP5	Ulp1 Interacting Protein	522015
S000001757	YKR049C	S. cerevisiae	FMP46	Found in Mitochondrial Proteome	526830
S000001761	YKR053C	S. cerevisiae	YSR3	Yeast Sphingolipid Resistance	534067
S000001764	YKR056W	S. cerevisiae	TRM2	tRNA Methyltransferase	549448
S000001766	YKR058W	S. cerevisiae	GLG1	Glycogenin-Like Gene	552770
S000001768	YKR060W	S. cerevisiae	UTP30	U Three Protein	556518
S000001769	YKR061W	S. cerevisiae	KTR2	Kre Two Related	557677
S000001770	YKR062W	S. cerevisiae	TFA2	Transcription Factor a, subunit 2	559666
S000001776	YKR068C	S. cerevisiae	BET3	Blocked Early in Transport	570328
S000001778	YKR070W	S. cerevisiae			573574
S000001783	YKR075C	S. cerevisiae			579827
S000001785	YKR077W	S. cerevisiae	MSA2	Mbf and Sbf Associated	583653
S000001787	YKR079C	S. cerevisiae	TRZ1	tRNase Z	586789
S000001791	YKR083C	S. cerevisiae	DAD2	Duo1 And Dam1 interacting	596421
S000001795	YKR087C	S. cerevisiae	OMA1	Overlapping activity with M-AAA protease	603195
S000001798	YKR090W	S. cerevisiae	PXL1	PaXillin-Like protein	608946
S000028512	YKR095W-A	S. cerevisiae	PCC1	Polarized growth Chromatin-associated Controller	625864
S000001806	YKR098C	S. cerevisiae	UBP11	UBiquitin-specific Protease	633026
S000001807	YKR099W	S. cerevisiae	BAS1	BASal	635851
S000001808	YKR100C	S. cerevisiae	SKG1	Suppressor of lethality of Kex2 Gas1 double null mutant	638901
S000001813	YKR105C	S. cerevisiae	VBA5	Vacuolar Basic Amino acid transporter	658716
S000003934	YLL011W	S. cerevisiae	SOF1	Suppressor Of Fibrillarin	127523
S000003944	YLL021W	S. cerevisiae	SPA2	Spindle Pole Antigen	100947
S000003958	YLL035W	S. cerevisiae	GRC3		68580
S000003959	YLL036C	S. cerevisiae	PRP19	Pre-RNA Processing	66745
S000003965	YLL042C	S. cerevisiae	ATG10	AuTophaGy related	52087
S000003973	YLL050C	S. cerevisiae	COF1	COFilin	39804
S000003986	YLL063C	S. cerevisiae	AYT1	AcetYlTransferase	14648
S000003991	YLR001C	S. cerevisiae			151389
S000003992	YLR002C	S. cerevisiae	NOC3	NucleOlar Complex associated	154343
S000003996	YLR006C	S. cerevisiae	SSK1	Suppressor of Sensor Kinase	161755
S000003997	YLR007W	S. cerevisiae	NSE1	Non-SMC Element	164392
S000003998	YLR008C	S. cerevisiae	PAM18	Presequence translocase-Associated Motor	165577
S000004004	YLR014C	S. cerevisiae	PPR1	Pyrimidine Pathway Regulation	172268
S000004005	YLR015W	S. cerevisiae	BRE2	BREfeldin A sensitivity	175227
S000004006	YLR016C	S. cerevisiae	PML1	Pre-mRNA Leakage	176802
S000004016	YLR026C	S. cerevisiae	SED5	Suppressor of Erd2 Deletion	195450
S000004020	YLR030W	S. cerevisiae			203290
S000004021	YLR031W	S. cerevisiae			204225
S000004022	YLR032W	S. cerevisiae	RAD5	RADiation sensitive	204991
S000004023	YLR033W	S. cerevisiae	RSC58	Remodel the Structure of Chromatin	208761
S000004035	YLR045C	S. cerevisiae	STU2	Suppressor of TUbulin	235037
S000004041	YLR051C	S. cerevisiae	FCF2	Faf1p Copurifying Factor	246324
S000004042	YLR052W	S. cerevisiae	IES3	Ino Eighty Subunit	247201
S000004044	YLR054C	S. cerevisiae	OSW2	Outer Spore Wall	248717
S000004049	YLR059C	S. cerevisiae	REX2	Rna EXonuclease	259738
S000004054	YLR064W	S. cerevisiae	PER33	Pore and ER protein, 33 kDa	265456
S000004058	YLR068W	S. cerevisiae	FYV7	Function required for Yeast Viability	271008
S000004064	YLR074C	S. cerevisiae	BUD20	BUD site selection	281956
S000004067	YLR077W	S. cerevisiae	FMP25	Found in Mitochondrial Proteome	283872
S000004068	YLR078C	S. cerevisiae	BOS1	Bet One Suppressor	285736
S000004069	YLR079W	S. cerevisiae	SIC1	Substrate/Subunit Inhibitor of Cyclin-dependent protein kinase	286820
S000004073	YLR083C	S. cerevisiae	EMP70		294091
S000004075	YLR085C	S. cerevisiae	ARP6	Actin-Related Protein	300673
S000004076	YLR086W	S. cerevisiae	SMC4	Structural Maintenance of Chromosomes	302243
S000004089	YLR099C	S. cerevisiae	ICT1	Increased Copper Tolerance	339744
S000004090	YLR100W	S. cerevisiae	ERG27	ERGosterol biosynthesis	341810
S000004091	YLR101C	S. cerevisiae			342566
S000004093	YLR103C	S. cerevisiae	CDC45	Cell Division Cycle	343989
S000004095	YLR105C	S. cerevisiae	SEN2	Splicing ENdonuclease	347047
S000004097	YLR107W	S. cerevisiae	REX3	Rna EXonuclease	364116
S000004104	YLR114C	S. cerevisiae	AVL9	Apl2 Vps1 Lethal	374944
S000004109	YLR119W	S. cerevisiae	SRN2	Suppressor of Rna mutations, Number 2	385534
S000004118	YLR128W	S. cerevisiae	DCN1	Defective in Cullin Neddylation	398530
S000004122	YLR132C	S. cerevisiae	USB1	U Six Biogenesis	407283
S000004123	YLR133W	S. cerevisiae	CKI1	Choline KInase	408445
S000004129	YLR139C	S. cerevisiae	SLS1	Synthetic Lethal with SSM4	421542
S000004136	YLR146C	S. cerevisiae	SPE4	SPErmidine auxotroph	432823
S000113566	YLR146W-A	S. cerevisiae			433870
S000004137	YLR147C	S. cerevisiae	SMD3		434158
S000004142	YLR152C	S. cerevisiae			442958
S000004143	YLR153C	S. cerevisiae	ACS2	Acetyl CoA Synthetase	445524
S000004153	YLR163C	S. cerevisiae	MAS1	Mitochondrial ASsembly	491866
S000004159	YLR169W	S. cerevisiae			500335
S000004162	YLR172C	S. cerevisiae	DPH5	DiPHthamide	501260
S000004163	YLR173W	S. cerevisiae			502421
S000004171	YLR181C	S. cerevisiae	VTA1	VpsTwenty Associated	516678
S000004186	YLR196W	S. cerevisiae	PWP1	Periodic tryptophan (W) Protein	543968
S000004197	YLR207W	S. cerevisiae	HRD3	HMG-coA Reductase Degradation	556788
S000004199	YLR209C	S. cerevisiae	PNP1	purine nucleoside phosphorylase	560797
S000004204	YLR214W	S. cerevisiae	FRE1	Ferric REductase	568567
S000004211	YLR221C	S. cerevisiae	RSA3	RiboSome Assembly	578362
S000028568	YLR222C-A	S. cerevisiae			582006
S000004213	YLR223C	S. cerevisiae	IFH1	Interacts with Fork Head	582233
S000004216	YLR226W	S. cerevisiae	BUR2	Bypass UAS Requirement	589354
S000004219	YLR229C	S. cerevisiae	CDC42	Cell Division Cycle	604212
S000004221	YLR231C	S. cerevisiae	BNA5	Biosynthesis of Nicotinic Acid	605758
S000004223	YLR233C	S. cerevisiae	EST1	Ever Shorter Telomeres	607425
S000004226	YLR236C	S. cerevisiae			611794
S000004228	YLR238W	S. cerevisiae	FAR10	Factor ARrest	614755
S000004229	YLR239C	S. cerevisiae	LIP2	LIPoyl ligase	616332
S000004230	YLR240W	S. cerevisiae	VPS34	Vacuolar Protein Sorting	617533
S000004231	YLR241W	S. cerevisiae	CSC1	Calcium permeable Stress-gated cation Channel	620473
S000004233	YLR243W	S. cerevisiae	GPN3	Gly-Pro-Asn (N) motif	624203
S000004234	YLR244C	S. cerevisiae	MAP1	Methionine AminoPeptidase	625168
S000004235	YLR245C	S. cerevisiae	CDD1	CytiDine Deaminase	626502
S000004236	YLR246W	S. cerevisiae	ERF2	Effect on Ras Function	627118
S000004238	YLR248W	S. cerevisiae	RCK2	Radiation sensitivity Complementing Kinase	634252
S000004247	YLR257W	S. cerevisiae			658826
S000004249	YLR259C	S. cerevisiae	HSP60	Heat Shock Protein	663284
S000007246	YLR262C-A	S. cerevisiae	TMA7	Translation Machinery Associated	669468
S000004253	YLR263W	S. cerevisiae	RED1	REDuctional division	670340
S000004258	YLR268W	S. cerevisiae	SEC22	SECretory	680200
S000004267	YLR277C	S. cerevisiae	YSH1	Yeast Seventy-three Homolog	697156
S000004275	YLR285W	S. cerevisiae	NNT1	Nicotinamide N-methylTransferase	707360
S000004283	YLR292C	S. cerevisiae	SEC72	SECretory	719789
S000004284	YLR293C	S. cerevisiae	GSP1	Genetic Suppressor of Prp20-1	720771
S000004289	YLR298C	S. cerevisiae	YHC1	Yeast Homolog of human U1C	724721
S000004301	YLR310C	S. cerevisiae	CDC25	Cell Division Cycle	752224
S000004304	YLR312W-A	S. cerevisiae	MRPL15	Mitochondrial Ribosomal Protein, Large subunit	759480
S000004307	YLR315W	S. cerevisiae	NKP2	Non-essential Kinetochore Protein	764808
S000004315	YLR323C	S. cerevisiae	CWC24	Complexed With Cef1p	778173
S000004317	YLR325C	S. cerevisiae	RPL38	Ribosomal Protein of the Large subunit	781143
S000004319	YLR327C	S. cerevisiae	TMA10	Translation Machinery Associated	783127
S000004327	YLR335W	S. cerevisiae	NUP2	NUclear Pore	797430
S000004330	YLR338W	S. cerevisiae	OPI9	OverProducer of Inositol	804346
S000004348	YLR356W	S. cerevisiae	ATG33	AuTophaGy related	840321
S000004349	YLR357W	S. cerevisiae	RSC2	Remodel the Structure of Chromatin	841331
S000004350	YLR358C	S. cerevisiae			843487
S000004355	YLR363C	S. cerevisiae	NMD4	Nonsense-Mediated mRNA Decay	852495
S000004360	YLR368W	S. cerevisiae	MDM30	Mitochondrial Distribution and Morphology	857540
S000004368	YLR376C	S. cerevisiae	PSY3	Platinum SensitivitY	872826
S000004373	YLR381W	S. cerevisiae	CTF3	Chromosome Transmission Fidelity	879723
S000004374	YLR382C	S. cerevisiae	NAM2	Nuclear Accommodation of Mitochondria	882067
S000004378	YLR386W	S. cerevisiae	VAC14	VACuole morphology and inheritance mutant	893628
S000004381	YLR389C	S. cerevisiae	STE23	STErile	899577
S000004382	YLR390W	S. cerevisiae	ECM19	ExtraCellular Mutant	903066
S000004390	YLR398C	S. cerevisiae	SKI2	SuperKIller	915156
S000004393	YLR401C	S. cerevisiae	DUS3	DihydroUridine Synthase	922442
S000004395	YLR403W	S. cerevisiae	SFP1	Split Finger Protein	925568
S000004400	YLR408C	S. cerevisiae	BLS1	BLoS1-homolog	933885
S000004404	YLR412W	S. cerevisiae	BER1	Benomyl REsistant 1	948368
S000004408	YLR416C	S. cerevisiae			954491
S000004410	YLR418C	S. cerevisiae	CDC73	Cell Division Cycle	956914
S000004418	YLR426W	S. cerevisiae	TDA5	Topoisomerase I Damage Affected	987062
S000004419	YLR427W	S. cerevisiae	MAG2		988428
S000004420	YLR428C	S. cerevisiae			990617
S000004425	YLR433C	S. cerevisiae	CNA1	CalciNeurin A	1004347
S000004430	YLR438W	S. cerevisiae	CAR2	Catabolism of ARginine	1012501
S000004440	YLR448W	S. cerevisiae	RPL6B	Ribosomal Protein of the Large subunit	1028854
S000004443	YLR451W	S. cerevisiae	LEU3	LEUcine biosynthesis	1036093
S000004444	YLR452C	S. cerevisiae	SST2	SuperSensiTive	1039270
S000004445	YLR453C	S. cerevisiae	RIF2	Rap1p-Interacting Factor	1041799
S000004449	YLR457C	S. cerevisiae	NBP1	Nap1 Binding Protein	1055812
S000004451	YLR459W	S. cerevisiae	GAB1	GPI and Actin Bar	1057334
S000007621	YML007C-A	S. cerevisiae	MIN4	mitochondrial MINi protein of 4 kDa	253162
S000004468	YML009C	S. cerevisiae	MRPL39	Mitochondrial Ribosomal Protein, Large subunit	251304
S000004472	YML011C	S. cerevisiae	RAD33	RADiation sensitive	246895
S000004475	YML013W	S. cerevisiae	UBX2	UBiquitin regulatory X	244149
S000004478	YML016C	S. cerevisiae	PPZ1	Protein Phosphatase Z	239458
S000004488	YML026C	S. cerevisiae	RPS18B	Ribosomal Protein of the Small subunit	222987
S000004493	YML031W	S. cerevisiae	NDC1	Nuclear Division Cycle	214189
S000004497	YML034W	S. cerevisiae	SRC1	Spliced mRNA and Cell cycle regulated gene	209525
S000004502	YML038C	S. cerevisiae	YMD8		202775
S000004509	YML046W	S. cerevisiae	PRP39	Pre-mRNA Processing	181474
S000004515	YML051W	S. cerevisiae	GAL80	GALactose metabolism	171594
S000004519	YML055W	S. cerevisiae	SPC2	Signal Peptidase Complex	164790
S000004520	YML056C	S. cerevisiae	IMD4	IMP Dehydrogenase	162194
S000004521	YML057W	S. cerevisiae	CMP2	CalModulin binding Protein	160180
S000004524	YML059C	S. cerevisiae	NTE1	Neuropathy Target Esterase	153219
S000004526	YML061C	S. cerevisiae	PIF1	Petite Integration Frequency	148953
S000004527	YML062C	S. cerevisiae	MFT1	Mitochondrial Fusion Targeting	147505
S000004535	YML070W	S. cerevisiae	DAK1	DihydroxyAcetone Kinase	133475
S000004539	YML074C	S. cerevisiae	FPR3	Fk 506-sensitive Proline Rotamase	120089
S000004542	YML077W	S. cerevisiae	BET5	Blocked Early in Transport	111865
S000004550	YML085C	S. cerevisiae	TUB1	TUBulin	97941
S000004551	YML086C	S. cerevisiae	ALO1	D-Arabinono-1,4-Lactone Oxidase	95791
S000004569	YML101C-A	S. cerevisiae			69409
S000004571	YML103C	S. cerevisiae	NUP188	NUclear Pore	62582
S000004573	YML105C	S. cerevisiae	SEC65	SECretory	57866
S000004574	YML106W	S. cerevisiae	URA5	URAcil requiring	56773
S000004579	YML111W	S. cerevisiae	BUL2	Binds Ubiquitin Ligase	46942
S000004583	YML115C	S. cerevisiae	VAN1	VANadate resistance protein	40187
S000004585	YML117W	S. cerevisiae	NAB6	Nucleic Acid Binding protein	34243
S000004590	YML121W	S. cerevisiae	GTR1	GTp binding protein Resemblance	26930
S000004591	YML122C	S. cerevisiae			26038
S000004594	YML125C	S. cerevisiae	PGA3	Processing of Gas1p and ALP	20761
S000004599	YML130C	S. cerevisiae	ERO1	ER Oxidation or Endoplasmic Reticulum Oxidoreductin	11483
S000004603	YMR001C	S. cerevisiae	CDC5	Cell Division Cycle	269019
S000004606	YMR004W	S. cerevisiae	MVP1	Multi-copy suppressor of vps1	274017
S000004612	YMR010W	S. cerevisiae	ANY1	Antagonizes Neo1 Yeast phospholipid flippase	285100
S000004625	YMR023C	S. cerevisiae	MSS1	Mitochondrial Splicing System	319437
S000004628	YMR026C	S. cerevisiae	PEX12	PEroXin	324236
S000004630	YMR028W	S. cerevisiae	TAP42	Two A phosphatase Associated Protein	327482
S000004632	YMR030W	S. cerevisiae	RSF1	ReSpiration Factor	330793
S000004635	YMR032W	S. cerevisiae	HOF1	Homolog Of cdc Fifteen	335298
S000004636	YMR033W	S. cerevisiae	ARP9	Actin-Related Protein	337788
S000004642	YMR039C	S. cerevisiae	SUB1	SUppressor of TFIIB mutations	348644
S000004647	YMR044W	S. cerevisiae	IOC4	Iswi One Complex	355384
S000004659	YMR055C	S. cerevisiae	BUB2	Budding Uninhibited by Benzimidazole	386101
S000004668	YMR064W	S. cerevisiae	AEP1	ATPase ExPression	397903
S000004670	YMR066W	S. cerevisiae	SOV1	Synthesis Of Var	401541
S000004674	YMR070W	S. cerevisiae	MOT3	Modifier of Transcription	409154
S000004675	YMR071C	S. cerevisiae	TVP18	Tlg2-Vesicle Protein	410762
S000004680	YMR075W	S. cerevisiae	RCO1		413982
S000004682	YMR077C	S. cerevisiae	VPS20	Vacuolar Protein Sorting	421484
S000004684	YMR079W	S. cerevisiae	SEC14	SECretory	424989
S000004697	YMR091C	S. cerevisiae	NPL6	Nuclear Protein Localization	450058
S000004704	YMR098C	S. cerevisiae	ATP25	ATPase	460771
S000004712	YMR106C	S. cerevisiae	YKU80	Yeast KU protein	478301
S000004714	YMR108W	S. cerevisiae	ILV2	IsoLeucine-plus-Valine requiring	484084
S000004715	YMR109W	S. cerevisiae	MYO5	MYOsin	486587
S000004717	YMR111C	S. cerevisiae	EUC1	Enriches Ubiquitin on Chromatin	492404
S000004718	YMR112C	S. cerevisiae	MED11	MEDiator complex	494100
S000004719	YMR113W	S. cerevisiae	FOL3	FOLic acid synthesis	494999
S000004728	YMR121C	S. cerevisiae	RPL15B	Ribosomal Protein of the Large subunit	509734
S000004733	YMR126C	S. cerevisiae	DLT1	Defect at Low Temperature	520761
S000004737	YMR130W	S. cerevisiae	DPI35	Delta-Psi dependent mitochondrial Import protein of 35 kDa	532119
S000004738	YMR131C	S. cerevisiae	RRB1	Regulator of Ribosome Biogenesis	533163
S000004749	YMR141C	S. cerevisiae			549736
S000004757	YMR149W	S. cerevisiae	SWP1	Suppressor of a WbP1 mutation	560996
S000004759	YMR151W	S. cerevisiae	YIM2		562506
S000004760	YMR152W	S. cerevisiae	YIM1		563096
S000004763	YMR154C	S. cerevisiae	RIM13	Regulator of IME2	565999
S000004767	YMR158W	S. cerevisiae	MRPS8	Mitochondrial Ribosomal Protein, Small subunit	572248
S000004769	YMR159C	S. cerevisiae	ATG16	AuTophaGy related	574476
S000004774	YMR164C	S. cerevisiae	MSS11	Multicopy Suppressor of STA genes	587274
S000004783	YMR172W	S. cerevisiae	HOT1	High-Osmolarity-induced Transcription	605981
S000004790	YMR178W	S. cerevisiae	FPY1	FAD PYrophosphatase	618479
S000004791	YMR179W	S. cerevisiae	SPT21	SuPpressor of Ty	619858
S000004792	YMR180C	S. cerevisiae	CTL1	Capping enzyme mRNA Triphosphatase-Like	622251
S000004796	YMR184W	S. cerevisiae	ADD37	Alpha1-proteinase inhibitor-Degradation Deficient	628189
S000004799	YMR187C	S. cerevisiae			634689
S000004800	YMR188C	S. cerevisiae	MRPS17	Mitochondrial Ribosomal Protein, Small subunit	636291
S000004804	YMR192W	S. cerevisiae	GYL1	GYp Like	647118
S000004806	YMR193W	S. cerevisiae	MRPL24	Mitochondrial Ribosomal Protein, Large subunit	650036
S000004812	YMR199W	S. cerevisiae	CLN1	CycLiN	662644
S000004813	YMR200W	S. cerevisiae	ROT1	Reversal Of Tor2 lethality	664752
S000004823	YMR210W	S. cerevisiae	MGL2	MonoacylGlycerol Lipase	687516
S000004824	YMR211W	S. cerevisiae	DML1	Drosophila melanogaster Misato-Like protein	689083
S000004825	YMR212C	S. cerevisiae	EFR3	PHO Eighty Five Requiring	690695
S000004826	YMR213W	S. cerevisiae	CEF1	CErevisiae homolog of cdc Five	693381
S000004827	YMR214W	S. cerevisiae	SCJ1	S. Cerevisiae DnaJ	695350
S000004838	YMR225C	S. cerevisiae	MRPL44	Mitochondrial Ribosomal Protein, Large subunit	720960
S000004839	YMR226C	S. cerevisiae			721593
S000004843	YMR230W	S. cerevisiae	RPS10B	Ribosomal Protein of the Small subunit	732414
S000004845	YMR232W	S. cerevisiae	FUS2	cell FUSion	736926
S000004846	YMR233W	S. cerevisiae	TRI1		739185
S000004849	YMR236W	S. cerevisiae	TAF9	TATA binding protein-Associated Factor	742971
S000004850	YMR237W	S. cerevisiae	BCH1	Bud7 and Chs6 Homolog	743749
S000004852	YMR239C	S. cerevisiae	RNT1	RNase Three	748262
S000004853	YMR240C	S. cerevisiae	CUS1	Cold sensitive U2 snRNA Suppressor	749930
S000004855	YMR242C	S. cerevisiae	RPL20A	Ribosomal Protein of the Large subunit	753225
S000004858	YMR244W	S. cerevisiae			757250
S000004861	YMR247C	S. cerevisiae	RKR1	RING domain mutant Killed by Rtf1 deletion	763351
S000028849	YMR247W-A	S. cerevisiae			769283
S000004863	YMR251W	S. cerevisiae	GTO3	Glutathione Transferase Omega-like	772915
S000004868	YMR255W	S. cerevisiae	GFD1	Good For Dbp5p	778001
S000004870	YMR257C	S. cerevisiae	PET111	PETite colonies	779629
S000004871	YMR258C	S. cerevisiae	ROY1	Repressor Of Ypt52	782620
S000004872	YMR259C	S. cerevisiae	TRM732	Transfer RNA Methyltransferase	784621
S000004878	YMR265C	S. cerevisiae			796540
S000004882	YMR269W	S. cerevisiae	TMA23	Translation Machinery Associated	804456
S000004883	YMR270C	S. cerevisiae	RRN9	Regulation of RNA polymerase I	805326
S000004886	YMR273C	S. cerevisiae	ZDS1	Zillion Different Screens	811233
S000004889	YMR276W	S. cerevisiae	DSK2		818827
S000004890	YMR277W	S. cerevisiae	FCP1	tfiiF-associating component of Ctd Phosphatase	820256
S000004894	YMR281W	S. cerevisiae	GPI12	GlycosylPhosphatidylInositol anchor biosynthesis	832339
S000004896	YMR283C	S. cerevisiae	RIT1	Ribosylation of Initiator tRNA	835326
S000004897	YMR284W	S. cerevisiae	YKU70	Yeast KU protein	838187
S000004898	YMR285C	S. cerevisiae	NGL2		840144
S000004900	YMR287C	S. cerevisiae	DSS1	Deletion of SUV3 Supressor	842436
S000004905	YMR291W	S. cerevisiae	TDA1	Topoisomerase I Damage Affected	852630
S000004909	YMR294W-A	S. cerevisiae			858209
S000004910	YMR295C	S. cerevisiae			858297
S000004912	YMR297W	S. cerevisiae	PRC1	PRoteinase C	861922
S000004913	YMR298W	S. cerevisiae	LIP1	Lag1p/Lac1p Interacting Protein	863819
S000004919	YMR304C-A	S. cerevisiae			878780
S000004923	YMR306W	S. cerevisiae	FKS3	FK506 Sensitivity	881159
S000004924	YMR307W	S. cerevisiae	GAS1	Glycophospholipid-Anchored Surface protein	887003
S000004926	YMR309C	S. cerevisiae	NIP1	Nuclear ImPort	892988
S000004927	YMR310C	S. cerevisiae			895716
S000004930	YMR313C	S. cerevisiae	TGL3	TriacylGlycerol Lipase	899379
S000004932	YMR315W	S. cerevisiae			902800
S000004935	YMR316W	S. cerevisiae	DIA1	Digs Into Agar	904825
S000004947	YNL002C	S. cerevisiae	RLP7	Ribosomal-Like Protein	626174
S000004950	YNL005C	S. cerevisiae	MRP7	Mitochondrial Ribosomal Protein	621313
S000004955	YNL010W	S. cerevisiae	PYP1	PolYol Phosphatase	613635
S000004961	YNL016W	S. cerevisiae	PUB1	PolyUridylate Binding	602907
S000004963	YNL018C	S. cerevisiae			599936
S000004965	YNL020C	S. cerevisiae	ARK1	Actin Regulating Kinase	595623
S000004969	YNL024C	S. cerevisiae	EFM6	Elongation Factor Methyltransferase	587107
S000004977	YNL032W	S. cerevisiae	SIW14	Synthetic Interaction with Whi2	574506
S000004981	YNL036W	S. cerevisiae	NCE103	NonClassical Export	559814
S000004983	YNL038W	S. cerevisiae	GPI15	GlycosylPhosphatidylInositol anchor biosynthesis	557020
S000004984	YNL039W	S. cerevisiae	BDP1	B Double Prime	555048
S000004985	YNL040W	S. cerevisiae			553380
S000004992	YNL047C	S. cerevisiae	SLM2	Synthetic Lethal with Mss4	539911
S000004996	YNL051W	S. cerevisiae	COG5	Conserved Oligomeric Golgi complex	532659
S000004998	YNL053W	S. cerevisiae	MSG5	Multicopy Suppressor of GPA1	529942
S000005001	YNL056W	S. cerevisiae	OCA2	Oxidant-induced Cell cycle Arrest	517249
S000005004	YNL059C	S. cerevisiae	ARP5	Actin-Related Protein	512668
S000005006	YNL062C	S. cerevisiae	GCD10	General Control Derepressed	508776
S000005007	YNL063W	S. cerevisiae	MTQ1	Methyltransferase	507758
S000005010	YNL066W	S. cerevisiae	SUN4	Sim1 Uth1 Nca3	501515
S000005012	YNL068C	S. cerevisiae	FKH2	ForK head Homolog	495701
S000005020	YNL076W	S. cerevisiae	MKS1	Multicopy Kinase Suppressor	483556
S000005021	YNL077W	S. cerevisiae	APJ1	Anti-Prion DnaJ	481391
S000005022	YNL078W	S. cerevisiae	NIS1	Neck protein Interacting with Septins	479768
S000005023	YNL079C	S. cerevisiae	TPM1	TroPoMyosin	478566
S000005025	YNL081C	S. cerevisiae	SWS2	Sick Without Securin	476188
S000005027	YNL083W	S. cerevisiae	SAL1	Suppressor of Aac2 Lethality	471377
S000005032	YNL088W	S. cerevisiae	TOP2	TOPoisomerase	457704
S000005041	YNL097C	S. cerevisiae	PHO23	PHOsphate metabolism	441366
S000005043	YNL099C	S. cerevisiae	OCA1	Oxidant-induced Cell-cycle Arrest	438567
S000005046	YNL102W	S. cerevisiae	POL1	POLymerase	430087
S000005047	YNL103W	S. cerevisiae	MET4	METhionine requiring	427735
S000005052	YNL108C	S. cerevisiae			419014
S000005054	YNL110C	S. cerevisiae	NOP15	NucleOlar Protein	417826
S000005062	YNL118C	S. cerevisiae	DCP2	mRNA DeCaPping	402652
S000005068	YNL124W	S. cerevisiae	NAF1	Nuclear Assembly Factor	392892
S000005071	YNL127W	S. cerevisiae	FAR11	Factor ARrest	383987
S000005072	YNL128W	S. cerevisiae	TEP1	TEnsin-like Phosphatase	382359
S000005077	YNL133C	S. cerevisiae	FYV6	Function required for Yeast Viability	374171
S000005080	YNL136W	S. cerevisiae	EAF7	Esa1-Associated Factor	370368
S000005085	YNL141W	S. cerevisiae	AAH1	Adenine AminoHydrolase	359596
S000005088	YNL144C	S. cerevisiae			352820
S000028851	YNL146C-A	S. cerevisiae			351386
S000005090	YNL146W	S. cerevisiae			351715
S000005091	YNL147W	S. cerevisiae	LSM7	Like SM	350940
S000005092	YNL148C	S. cerevisiae	ALF1	ALpha tubulin Folding	349907
S000005093	YNL149C	S. cerevisiae	PGA2	Processing of Gas1p and ALP	349367
S000005096	YNL152W	S. cerevisiae	INN1	required for INgressioN	346313
S000005099	YNL155W	S. cerevisiae	CUZ1	Cdc48-associated UBL/Zn-finger protein	342516
S000005101	YNL157W	S. cerevisiae	IGO1	Initiation of G zerO	340352
S000005105	YNL161W	S. cerevisiae	CBK1	Cell wall Biosynthesis Kinase	332597
S000005108	YNL164C	S. cerevisiae	IBD2	Inhibition of Bud Division 2	325265
S000005110	YNL166C	S. cerevisiae	BNI5	Bud Neck Involved	322219
S000005111	YNL167C	S. cerevisiae	SKO1	Suppressor of Kinase Overexpression	319416
S000005113	YNL169C	S. cerevisiae	PSD1	PhosphatidylSerine Decarboxylase	316169
S000005114	YNL170W	S. cerevisiae			315978
S000005124	YNL180C	S. cerevisiae	RHO5	Ras HOmolog	299654
S000005129	YNL185C	S. cerevisiae	MRPL19	Mitochondrial Ribosomal Protein, Large subunit	292193
S000005136	YNL192W	S. cerevisiae	CHS1	CHitin Synthase	276502
S000005137	YNL193W	S. cerevisiae			274368
S000005146	YNL202W	S. cerevisiae	SPS19	SPorulation-Specific	259578
S000005148	YNL204C	S. cerevisiae	SPS18	SPorulation-Specific	258375
S000005157	YNL213C	S. cerevisiae	RRG9	Required for Respiratory Growth	246460
S000005160	YNL216W	S. cerevisiae	RAP1	Repressor/Activator site binding Protein	241689
S000005161	YNL217W	S. cerevisiae	PPN2		240331
S000005165	YNL221C	S. cerevisiae	POP1	Processing Of Precursor RNAs	231068
S000005168	YNL224C	S. cerevisiae	SQS1	SQuelch of Splicing suppression	224796
S000005169	YNL225C	S. cerevisiae	CNM67	Chaotic Nuclear Migration	222724
S000005171	YNL227C	S. cerevisiae	JJJ1	J-protein (Type III)	220659
S000005177	YNL233W	S. cerevisiae	BNI4	Bud Neck Involved	211922
S000005182	YNL238W	S. cerevisiae	KEX2	Killer EXpression defective	202428
S000005187	YNL243W	S. cerevisiae	SLA2	Synthetic Lethal with ABP1	188051
S000005198	YNL254C	S. cerevisiae	RTC4	Restriction of Telomere Capping	168043
S000005199	YNL255C	S. cerevisiae	GIS2	GIg Suppressor	167329
S000005201	YNL257C	S. cerevisiae	SIP3	SNF1-Interacting Protein	160631
S000005202	YNL258C	S. cerevisiae	DSL1	Dependence on SLy1-20	158109
S000005203	YNL259C	S. cerevisiae	ATX1	AnTioXidant	157644
S000005205	YNL261W	S. cerevisiae	ORC5	Origin Recognition Complex	155100
S000005208	YNL264C	S. cerevisiae	PDR17	Pleiotropic Drug Resistance	145563
S000005217	YNL273W	S. cerevisiae	TOF1	TOpoisomerase I-interacting Factor	122883
S000005218	YNL274C	S. cerevisiae	GOR1	GlyOxylate Reductase	121118
S000005231	YNL287W	S. cerevisiae	SEC21	SECretory	91994
S000005239	YNL295W	S. cerevisiae	MRX6	Mitochondrial oRganization of gene eXpression (MIOREX)	76946
S000005241	YNL297C	S. cerevisiae	MON2	MONensin sensitivity	71673
S000005249	YNL305C	S. cerevisiae	BXI1	BaX Inhibitor	58898
S000005250	YNL306W	S. cerevisiae	MRPS18	Mitochondrial Ribosomal Protein, Small subunit	58155
S000005252	YNL308C	S. cerevisiae	KRI1	KRR1-Interacting protein	54122
S000005255	YNL311C	S. cerevisiae	SKP2	homology with human SKP2	49397
S000005265	YNL321W	S. cerevisiae	VNX1	Vacuolar Na+/H+ eXchanger	34696
S000005286	YNR003C	S. cerevisiae	RPC34	RNA Polymerase C	634344
S000005289	YNR006W	S. cerevisiae	VPS27	Vacuolar Protein Sorting	636986
S000005290	YNR007C	S. cerevisiae	ATG3	AuTophaGy related	639182
S000005292	YNR009W	S. cerevisiae	NRM1	Negative Regulator of MBF targets	642690
S000005303	YNR020C	S. cerevisiae	ATP23		667410
S000005306	YNR023W	S. cerevisiae	SNF12	Sucrose NonFermenting	670418
S000005307	YNR024W	S. cerevisiae	MPP6	M-Phase Phosphoprotein 6 homolog	672409
S000005317	YNR034W	S. cerevisiae	SOL1	Suppressor Of Los1-1	690321
S000005320	YNR037C	S. cerevisiae	RSM19	Ribosomal Small subunit of Mitochondria	695052
S000005322	YNR039C	S. cerevisiae	ZRG17	Zinc Regulated Gene	697614
S000005323	YNR040W	S. cerevisiae	MRX15	Mitochondrial oRganization of gene eXpression (MIOREX)	699690
S000005328	YNR045W	S. cerevisiae	PET494	PETite colonies	706139
S000005333	YNR050C	S. cerevisiae	LYS9	LYSine requiring	714048
S000005337	YNR054C	S. cerevisiae	ESF2	Eighteen S rRNA Factor 2	723356
S000005338	YNR055C	S. cerevisiae	HOL1	HistidinOl	728426
S000005348	YNR065C	S. cerevisiae			750350
S000005366	YOL006C	S. cerevisiae	TOP1	TOPoisomerase	313078
S000005372	YOL012C	S. cerevisiae	HTZ1	Histone Two A Z1	303579
S000028811	YOL013W-A	S. cerevisiae			301047
S000007252	YOL013W-B	S. cerevisiae			300690
S000005377	YOL017W	S. cerevisiae	ESC8	Establishes Silent Chromatin	292529
S000028707	YOL019W-A	S. cerevisiae			288420
S000005388	YOL028C	S. cerevisiae	YAP7	Yeast AP-1	270633
S000005389	YOL029C	S. cerevisiae			269815
S000005391	YOL031C	S. cerevisiae	SIL1	Suppressor of the Ire1/Lhs1 double mutant	266264
S000005393	YOL033W	S. cerevisiae	MSE1	Mitochondrial aminoacyl-tRNA Synthetase, Glutamate (E)	263475
S000005423	YOL062C	S. cerevisiae	APM4	clathrin Adaptor Protein complex Medium chain	210520
S000005438	YOL078W	S. cerevisiae	AVO1	Adheres VOraciously (to TOR2)	181682
S000005450	YOL090W	S. cerevisiae	MSH2	MutS Homolog	147382
S000005467	YOL107W	S. cerevisiae			112102
S000005468	YOL108C	S. cerevisiae	INO4	INOsitol requiring	111431
S000005469	YOL109W	S. cerevisiae	ZEO1	ZEOcin resistance	110297
S000005470	YOL110W	S. cerevisiae	SHR5	Suppressor of Hyperactive Ras	109176
S000005472	YOL112W	S. cerevisiae	MSB4	Multicopy Suppression of a Budding defect	106710
S000005473	YOL113W	S. cerevisiae	SKM1	STE20/PAK homologous Kinase related to Morphogenesis	104326
S000005474	YOL114C	S. cerevisiae	PTH4	peptidyl tRNA hydrolase 4	103317
S000005475	YOL115W	S. cerevisiae	PAP2	Poly(A) Polymerase	101475
S000005476	YOL116W	S. cerevisiae	MSN1	Multicopy suppressor of SNF1 mutation	99809
S000005477	YOL117W	S. cerevisiae	RRI2		97551
S000005488	YOL128C	S. cerevisiae	YGK3	Yeast homolog of Glycogen synthase Kinase	78352
S000005493	YOL133W	S. cerevisiae	HRT1	High level expression Reduces Ty3 transposition	70325
S000005498	YOL138C	S. cerevisiae	RTC1	Restriction of Telomere Capping	61325
S000005500	YOL140W	S. cerevisiae	ARG8	ARGinine requiring	58759
S000005502	YOL142W	S. cerevisiae	RRP40	Ribosomal RNA Processing	55558
S000005503	YOL143C	S. cerevisiae	RIB4	RIBoflavin biosynthesis	54595
S000005510	YOL150C	S. cerevisiae			44473
S000005511	YOL151W	S. cerevisiae	GRE2	Genes de Respuesta a Estres (stress responsive genes)	43694
S000005512	YOL152W	S. cerevisiae	FRE7	Ferric REductase	40748
S000005523	YOL163W	S. cerevisiae			9597
S000005524	YOL164W	S. cerevisiae	BDS1	Bacterially Derived Sulfatase	6175
S000005530	YOR004W	S. cerevisiae	UTP23	U Three-associated Protein	333592
S000005531	YOR005C	S. cerevisiae	DNL4	DNA Ligase	334509
S000006431	YOR008C-A	S. cerevisiae			342857
S000007628	YOR008W-B	S. cerevisiae			343929
S000005540	YOR014W	S. cerevisiae	RTS1	Rox Three Suppressor	357674
S000005541	YOR015W	S. cerevisiae			359993
S000005543	YOR017W	S. cerevisiae	PET127	PETite colonies	361412
S000005544	YOR018W	S. cerevisiae	ROD1	Resistance to O-Dinitrobenzene	364369
S000005546	YOR020C	S. cerevisiae	HSP10	Heat Shock Protein	370524
S000005547	YOR021C	S. cerevisiae	SFM1	Spout Family Methyltransferase 1	372798
S000005548	YOR022C	S. cerevisiae	DDL1	DDHD Domain-containing Lipase	373710
S000005551	YOR025W	S. cerevisiae	HST3	Homolog of SIR Two (SIR2)	378219
S000005553	YOR027W	S. cerevisiae	STI1	STress Inducible	381053
S000005558	YOR032C	S. cerevisiae	HMS1	High-copy Mep Suppressor	389771
S000005562	YOR036W	S. cerevisiae	PEP12	carboxyPEPtidase Y-deficient	400348
S000005563	YOR037W	S. cerevisiae	CYC2	CYtochrome C	401555
S000005565	YOR039W	S. cerevisiae	CKB2	Casein Kinase Beta' subunit	405768
S000005573	YOR047C	S. cerevisiae	STD1	Suppressor of Tbp Deletion	416347
S000005574	YOR048C	S. cerevisiae	RAT1	Ribonucleic Acid Trafficking	418630
S000005583	YOR057W	S. cerevisiae	SGT1	Suppressor of G2 (Two) allele of skp1	432186
S000005592	YOR066W	S. cerevisiae	MSA1	Mbf and Sbf Associated	449436
S000005593	YOR067C	S. cerevisiae	ALG8	Asparagine-Linked Glycosylation	451729
S000005597	YOR071C	S. cerevisiae	NRT1	Nicotinamide Riboside Transporter	459480
S000005602	YOR076C	S. cerevisiae	SKI7	SuperKIller	469377
S000005605	YOR079C	S. cerevisiae	ATX2	AnTioXidant	473475
S000005607	YOR081C	S. cerevisiae	TGL5	TriacylGlycerol Lipase	476939
S000005609	YOR083W	S. cerevisiae	WHI5	WHIskey	479533
S000005613	YOR087W	S. cerevisiae	YVC1	Yeast Vacuolar Conductance	487707
S000005616	YOR090C	S. cerevisiae	PTC5	Phosphatase Two C	491123
S000005617	YOR091W	S. cerevisiae	TMA46	Translation Machinery Associated	493433
S000005625	YOR099W	S. cerevisiae	KTR1	Kre Two Related	511825
S000005630	YOR104W	S. cerevisiae	PIN2	Psi+ INducibility	517642
S000005632	YOR106W	S. cerevisiae	VAM3	VAcuolar Morphogenesis	519121
S000005636	YOR110W	S. cerevisiae	TFC7		528941
S000005641	YOR115C	S. cerevisiae	TRS33	TRapp Subunit	538659
S000005647	YOR121C	S. cerevisiae			551798
S000005648	YOR122C	S. cerevisiae	PFY1	ProFilin of Yeast	552298
S000005653	YOR127W	S. cerevisiae	RGA1	Rho GTPase Activating Protein	561170
S000005656	YOR130C	S. cerevisiae	ORT1	ORnithine Transporter	569929
S000005674	YOR148C	S. cerevisiae	SPP2	Suppressor of PrP	608640
S000005684	YOR158W	S. cerevisiae	PET123	PETite colonies	632164
S000005689	YOR163W	S. cerevisiae	DDP1	Diadenosine and Diphosphoinositol Polyphosphate phosphohydrolase	642741
S000005697	YOR171C	S. cerevisiae	LCB4	Long-Chain Base	652010
S000005698	YOR172W	S. cerevisiae	YRM1	Yeast Reveromycin resistance Modulator	654210
S000005700	YOR174W	S. cerevisiae	MED4	MEDiator complex	658747
S000005701	YOR175C	S. cerevisiae	ALE1	Acyltransferase for Lyso-phosphatidylEthanolamine	659815
S000005702	YOR176W	S. cerevisiae	HEM15	HEMe biosynthesis	662401
S000005705	YOR179C	S. cerevisiae	SYC1	Similar to Ysh1 C-terminal	671845
S000005708	YOR182C	S. cerevisiae	RPS30B	Ribosomal Protein of the Small subunit	678191
S000005712	YOR186W	S. cerevisiae			683111
S000005714	YOR188W	S. cerevisiae	MSB1	Multicopy Suppression of a Budding defect	685767
S000005720	YOR194C	S. cerevisiae	TOA1		711683
S000005721	YOR195W	S. cerevisiae	SLK19	Synthetic Lethal Kar3p	712866
S000005723	YOR197W	S. cerevisiae	MCA1	MetaCAspase	717086
S000005727	YOR201C	S. cerevisiae	MRM1	Mitochondrial rRNA Methyltransferase	720470
S000005729	YOR203W	S. cerevisiae			722565
S000005731	YOR205C	S. cerevisiae	GEP3	GEnetic interactors of Prohibitins	725564
S000005735	YOR209C	S. cerevisiae	NPT1	Nicotinate PhosphoribosylTransferase	736437
S000005737	YOR211C	S. cerevisiae	MGM1	Mitochondrial Genome Maintenance	738924
S000005738	YOR212W	S. cerevisiae	STE4	STErile	742910
S000005745	YOR219C	S. cerevisiae	STE13	STErile	752214
S000005749	YOR223W	S. cerevisiae	DSC3	Defective for SREBP Cleavage	759782
S000005751	YOR225W	S. cerevisiae			761392
S000005758	YOR232W	S. cerevisiae	MGE1	Mitochondrial GrpE	774573
S000005759	YOR233W	S. cerevisiae	KIN4	KINase	775846
S000005765	YOR239W	S. cerevisiae	ABP140	Actin Binding Protein	784857
S000005772	YOR246C	S. cerevisiae	ENV9	late ENdosome and Vacuole interface function	795801
S000005775	YOR249C	S. cerevisiae	APC5	Anaphase Promoting Complex	798674
S000005776	YOR250C	S. cerevisiae	CLP1	CLeavage/Polyadenylation factor Ia subunit	800970
S000005778	YOR252W	S. cerevisiae	TMA16	Translation Machinery Associated	803667
S000005780	YOR254C	S. cerevisiae	SEC63	SECretory	805032
S000005788	YOR262W	S. cerevisiae	GPN2	Gly-Pro-Asn (N) motif	817292
S000005795	YOR269W	S. cerevisiae	PAC1	Perish in the Absence of Cin8p	826385
S000005799	YOR273C	S. cerevisiae	TPO4	Transporter of POlyamines	834452
S000005800	YOR274W	S. cerevisiae	MOD5	tRNA MODification	837674
S000005801	YOR275C	S. cerevisiae	RIM20	Regulator of IME2	839084
S000005802	YOR276W	S. cerevisiae	CAF20	Cap Associated Factor	841333
S000005805	YOR279C	S. cerevisiae	RFM1	Repression Factor of Middle sporulation element	843698
S000005807	YOR281C	S. cerevisiae	PLP2	Phosducin-Like Protein	846269
S000005811	YOR285W	S. cerevisiae	RDL1	RhoDanese-Like protein	849635
S000005812	YOR286W	S. cerevisiae	RDL2	RhoDanese-Like protein	850280
S000005818	YOR292C	S. cerevisiae			865653
S000005832	YOR305W	S. cerevisiae	RRG7	Required for Respiratory Growth	889022
S000005834	YOR307C	S. cerevisiae	SLY41	Suppressor of Loss of Ypt1	892731
S000005835	YOR308C	S. cerevisiae	SNU66	Small NUclear ribonucleoprotein associated	894624
S000005842	YOR315W	S. cerevisiae	SFG1	SuperFicial pseudohyphal Growth	904760
S000005850	YOR323C	S. cerevisiae	PRO2	PROline requiring	921535
S000005851	YOR324C	S. cerevisiae	FRT1	Functionally Related to TCP1	923232
S000005853	YOR326W	S. cerevisiae	MYO2	MYOsin	925721
S000005871	YOR344C	S. cerevisiae	TYE7	Ty1-mediated Expression	977194
S000005875	YOR348C	S. cerevisiae	PUT4	Proline UTilization	986899
S000005882	YOR355W	S. cerevisiae	GDS1		1005137
S000005884	YOR357C	S. cerevisiae	SNX3	Sorting NeXin	1009224
S000005886	YOR359W	S. cerevisiae	VTS1	VTi1-2 Suppressor	1011189
S000005894	YOR367W	S. cerevisiae	SCP1	S. cerevisiae CalPonin	1026007
S000005895	YOR368W	S. cerevisiae	RAD17	RADiation sensitive	1026843
S000028586	YOR376W-A	S. cerevisiae			1045196
S000005904	YOR377W	S. cerevisiae	ATF1	AcetylTransFerase	1046226
S000005910	YOR383C	S. cerevisiae	FIT3	Facilitator of Iron Transport	1060441
S000005911	YOR384W	S. cerevisiae	FRE5	Ferric REductase	1061564
S000005914	YOR387C	S. cerevisiae			1069621
S000005922	YPL001W	S. cerevisiae	HAT1	Histone AcetylTransferase	554605
S000005926	YPL005W	S. cerevisiae	AEP3	ATPase ExPression	548486
S000005928	YPL007C	S. cerevisiae	TFC8	Transcription Factor C	542082
S000005930	YPL009C	S. cerevisiae	RQC2	Ribosome Quality control Complex	535820
S000005931	YPL010W	S. cerevisiae	RET3	RETrieval from ER	535018
S000005932	YPL011C	S. cerevisiae	TAF3	TATA binding protein-Associated Factor	533642
S000005950	YPL029W	S. cerevisiae	SUV3	SUppressor of Var1	495506
S000005951	YPL030W	S. cerevisiae	TRM44	TRna Methyltransferase	493543
S000005953	YPL032C	S. cerevisiae	SVL3	Styryl dye Vacuolar Localization	488887
S000005956	YPL035C	S. cerevisiae			486564
S000005959	YPL038W	S. cerevisiae	MET31	METhionine requiring	480535
S000028588	YPL038W-A	S. cerevisiae			480182
S000005961	YPL040C	S. cerevisiae	ISM1	Isoleucyl tRNA Synthetase of Mitochondria	475993
S000005963	YPL042C	S. cerevisiae	SSN3	Suppressor of SNf1	473040
S000005964	YPL043W	S. cerevisiae	NOP4	NucleOlar Protein	469939
S000005966	YPL045W	S. cerevisiae	VPS16	Vacuolar Protein Sorting	467260
S000005967	YPL046C	S. cerevisiae	ELC1	ELongin C	466644
S000005968	YPL047W	S. cerevisiae	SGF11	SaGa associated Factor 11kDa	465962
S000005969	YPL048W	S. cerevisiae	CAM1	Calcium And Membrane-binding protein	464401
S000005970	YPL049C	S. cerevisiae	DIG1	Down-regulator of Invasive Growth	462481
S000005974	YPL053C	S. cerevisiae	KTR6	Kre Two Related	457118
S000005975	YPL054W	S. cerevisiae	LEE1		455759
S000005981	YPL060W	S. cerevisiae	MFM1	Mrs2 Function Modulating factor	434523
S000005987	YPL066W	S. cerevisiae	RGL1	Rho1 GEF Localizing	426233
S000005989	YPL068C	S. cerevisiae			424215
S000005990	YPL069C	S. cerevisiae	BTS1	Bet Two Suppressor	422885
S000005998	YPL077C	S. cerevisiae			409368
S000006004	YPL083C	S. cerevisiae	SEN54	Splicing ENdonuclease	396702
S000006005	YPL084W	S. cerevisiae	BRO1	BCK1-like Resistance to Osmotic shock	394038
S000006007	YPL086C	S. cerevisiae	ELP3	ELongator Protein	384773
S000006016	YPL095C	S. cerevisiae	EEB1	Ethyl Ester Biosynthesis	368071
S000006017	YPL096W	S. cerevisiae	PNG1	Peptide N-Glycanase	366927
S000006021	YPL100W	S. cerevisiae	ATG21	AuTophaGy related	361872
S000006027	YPL106C	S. cerevisiae	SSE1	Stress Seventy subfamily E	350194
S000006032	YPL111W	S. cerevisiae	CAR1	Catabolism of ARginine	339944
S000006033	YPL112C	S. cerevisiae	PEX25	PEroXisome related	337436
S000006039	YPL118W	S. cerevisiae	MRP51	Mitochondrial Ribosomal Protein	326628
S000006047	YPL126W	S. cerevisiae	NAN1	Net1 Associated Nuclear protein	310210
S000006049	YPL128C	S. cerevisiae	TBF1	TTAGGG repeat-Binding Factor	306533
S000006050	YPL129W	S. cerevisiae	TAF14	TATA binding protein-Associated Factor	305298
S000006051	YPL130W	S. cerevisiae	SPO19	SPOrulation	304387
S000006053	YPL132W	S. cerevisiae	COX11	Cytochrome c OXidase	301716
S000006058	YPL137C	S. cerevisiae	GIP3	Glc7 Interacting Protein	292817
S000006061	YPL140C	S. cerevisiae	MKK2	Mitogen-activated Kinase Kinase	287514
S000006069	YPL148C	S. cerevisiae	PPT2	Phosphopantetheine:Protein Transferase	272294
S000006075	YPL154C	S. cerevisiae	PEP4	carboxyPEPtidase Y-deficient	259714
S000006079	YPL158C	S. cerevisiae	AIM44	Altered Inheritance rate of Mitochondria	252034
S000006089	YPL168W	S. cerevisiae	MRX4	Mitochondrial oRganization of gene eXpression (MIOREX)	231217
S000006090	YPL169C	S. cerevisiae	MEX67	Messenger RNA EXport factor of 67 kDa	229039
S000006096	YPL175W	S. cerevisiae	SPT14	SuPpressor of Ty	218630
S000006102	YPL181W	S. cerevisiae	CTI6	Cyc8-Tup1 Interacting protein	203421
S000006107	YPL186C	S. cerevisiae	UIP4	Ulp1 Interacting Protein	194512
S000006108	YPL187W	S. cerevisiae	MF(ALPHA)1	Mating Factor ALPHA	193648
S000006114	YPL193W	S. cerevisiae	RSA1	RiboSome Assembly	181403
S000006125	YPL204W	S. cerevisiae	HRR25	HO and Radiation Repair	164276
S000006126	YPL205C	S. cerevisiae			163922
S000006128	YPL207W	S. cerevisiae	TYW1	Trna-YW synthesizing protein	159909
S000006134	YPL213W	S. cerevisiae	LEA1	Looks Exceptionally like U2A	150614
S000006136	YPL215W	S. cerevisiae	CBP3	Cytochrome B mRNA Processing	147416
S000006137	YPL216W	S. cerevisiae			143821
S000006141	YPL220W	S. cerevisiae	RPL1A	Ribosomal Protein of the Large subunit	135790
S000006146	YPL225W	S. cerevisiae			126006
S000006147	YPL226W	S. cerevisiae	NEW1	Nu+	121767
S000006148	YPL227C	S. cerevisiae	ALG5	Asparagine-Linked Glycosylation	120163
S000006158	YPL237W	S. cerevisiae	SUI3	SUppressor of Initiator codon	100496
S000006159	YPL238C	S. cerevisiae			100474
S000006160	YPL239W	S. cerevisiae	YAR1	Yeast Ankyrin Repeat	99484
S000006165	YPL244C	S. cerevisiae	HUT1	Homolog of UDP-galactose Transporter	87014
S000006170	YPL249C	S. cerevisiae	GYP5	Gtpase-activating protein for Ypt Proteins	76669
S000006438	YPL249C-A	S. cerevisiae	RPL36B	Ribosomal Protein of the Large subunit	75699
S000006171	YPL250C	S. cerevisiae	ATG41	AuTophaGy related	74309
S000006179	YPL258C	S. cerevisiae	THI21	THIamine metabolism	53498
S000006181	YPL260W	S. cerevisiae	CUB1	Cu2+ suppressing and Bleomycin sensitive	49303
S000006185	YPL264C	S. cerevisiae			43283
S000006190	YPL269W	S. cerevisiae	KAR9	KARyogamy	33013
S000006191	YPL270W	S. cerevisiae	MDL2	MultiDrug resistance-Like	30482
S000006193	YPL272C	S. cerevisiae	PBI1	PSTB2 Interacting protein 1	26611
S000006211	YPR007C	S. cerevisiae	REC8	RECombination	569336
S000006212	YPR008W	S. cerevisiae	HAA1	Homolog of Ace1 Activator	573018
S000006213	YPR009W	S. cerevisiae	SUT2	Sterol UpTake	576552
S000006214	YPR010C	S. cerevisiae	RPA135	RNA Polymerase A	577585
S000006219	YPR015C	S. cerevisiae			590283
S000006222	YPR018W	S. cerevisiae	RLF2	Rap1 protein Localization Factor	594476
S000006223	YPR019W	S. cerevisiae	MCM4	MiniChromosome Maintenance	596750
S000006226	YPR022C	S. cerevisiae	SDD4	Suppressor of Degenerative Death	603911
S000006228	YPR024W	S. cerevisiae	YME1	Yeast Mitochondrial Escape	610481
S000006229	YPR025C	S. cerevisiae	CCL1		613377
S000006231	YPR027C	S. cerevisiae			620425
S000006232	YPR028W	S. cerevisiae	YOP1	YIP One Partner	623527
S000006234	YPR030W	S. cerevisiae	CSR2	Chs5 Spa2 Rescue	627880
S000006241	YPR037C	S. cerevisiae	ERV2	Essential for Respiration and Viability	646448
S000006247	YPR043W	S. cerevisiae	RPL43A	Ribosomal Protein of the Large subunit	654166
S000006249	YPR045C	S. cerevisiae	THP3	THO-related Protein	655140
S000006259	YPR055W	S. cerevisiae	SEC8	SECretory	667676
S000006260	YPR056W	S. cerevisiae	TFB4	Transcription Factor B subunit 4	671126
S000006270	YPR066W	S. cerevisiae	UBA3	UBiquitin-like protein-Activating enzyme	681213
S000006276	YPR072W	S. cerevisiae	NOT5	Negative On TATA	690107
S000006277	YPR073C	S. cerevisiae	LTP1	Low molecular weight protein Tyrosine Phosphatase	691933
S000006283	YPR079W	S. cerevisiae	MRL1	Mannose 6-phosphate Receptor Like	698869
S000006290	YPR086W	S. cerevisiae	SUA7	Suppressor of Upstream AUG	710101
S000006292	YPR088C	S. cerevisiae	SRP54	Signal Recognition Particle 54-kD subunit	711403
S000006298	YPR094W	S. cerevisiae	RDS3	Regulator of Drug Sensitivity	720637
S000006309	YPR105C	S. cerevisiae	COG4	Conserved Oligomeric Golgi complex	736984
S000006315	YPR111W	S. cerevisiae	DBF20	DumbBell Forming	747306
S000006319	YPR115W	S. cerevisiae	RGC1	Regulator of the Glycerol Channel	754877
S000006322	YPR118W	S. cerevisiae	MRI1	MethylthioRibose-1-phosphate Isomerase	767752
S000006323	YPR119W	S. cerevisiae	CLB2	CycLin B	771653
S000006325	YPR121W	S. cerevisiae	THI22	THIamine metabolism	778583
S000006326	YPR122W	S. cerevisiae	AXL1	AXiaL budding	782045
S000006329	YPR125W	S. cerevisiae	YLH47	Yeast LETM1 Homolog of 47 kD	787961
S000006331	YPR127W	S. cerevisiae			790083
S000006333	YPR129W	S. cerevisiae	SCD6	Suppressor of Clathrin Deficiency	792687
S000006336	YPR132W	S. cerevisiae	RPS23B	Ribosomal Protein of the Small subunit	794965
S000006338	YPR134W	S. cerevisiae	MSS18	Mitochondrial Splicing System	798051
S000006342	YPR138C	S. cerevisiae	MEP3		810984
S000006343	YPR139C	S. cerevisiae	LOA1	Lysophosphatidic acid: Oleoyl-CoA Acyltransferase	813156
S000006347	YPR143W	S. cerevisiae	RRP15	Ribosomal RNA Processing	818323
S000006348	YPR144C	S. cerevisiae	NOC4	NucleOlar Complex associated	819765
S000006352	YPR148C	S. cerevisiae			826833
S000006356	YPR152C	S. cerevisiae	URN1	U2-U5-U6 snRNP, RES complex, and NTC interacting protein	832061
S000006360	YPR156C	S. cerevisiae	TPO3	Transporter of POlyamines	837909
S000006367	YPR163C	S. cerevisiae	TIF3	Translation Initiation Factor	868645
S000006369	YPR165W	S. cerevisiae	RHO1	Ras HOmolog	875368
S000006370	YPR166C	S. cerevisiae	MRP2	Mitochondrial Ribosomal Protein	876282
S000006372	YPR168W	S. cerevisiae	NUT2	Negative regulation of URS Two	878076
S000006375	YPR171W	S. cerevisiae	BSP1	Binding protein of Synaptojanin Polyphosphoinositide phosphatase domain	883828
S000006379	YPR175W	S. cerevisiae	DPB2	DNA Polymerase B subunit 2	888974
S000006391	YPR187W	S. cerevisiae	RPO26	RNA POlymerase	911257
S000006392	YPR188C	S. cerevisiae	MLC2	Myo1p Light Chain	911988
S000006394	YPR190C	S. cerevisiae	RPC82	RNA Polymerase C	917077
S000006404	YPR200C	S. cerevisiae	ARR2	ARsenicals Resistance	939279
Gene Primary DBID		species	name	Function	position

## Sheet: Feuil2
pvalue	log2	gene	pos	chr	name	Function	x	Complex 12
0.000321317	-24.5184	YGR176W	848720	7	NA	NA
9.89534e-06	-22.1904	YLR428C	990617	12	NA	NA
2.13785e-07	-21.6875	YCR087W	263976	3	NA	NA
0.00111438	-21.414	YPL238C	100474	16	NA	NA
0.0029729	-20.1196	YJL086C	272478	10	NA	NA
0.0242978	-19.0235	YKR105C	658716	11	VBA5	Vacuolar Basic Amino acid transporter	x
2.13785e-07	-18.6125	YOR387C	1069621	15	NA	NA
2.13785e-07	-15.5256	YDR316W-B	1096064	4	NA	NA
0.0362221	-5.15359	YJL157C	123836	10	FAR1	Factor ARrest
0.0226807	-5.12631	YML101C-A	69409	13	NA	NA
0.0204751	-4.63358	YHR005C	113499	8	GPA1	G Protein Alpha subunit
0.01864	-4.60359	YGL193C	141916	7	NA	NA
0.001321	-4.57283	YLR031W	204225	12	NA	NA
0.0404413	-4.56311	YDL050C	364446	4	NA	NA
0.0243764	-4.55538	YJL202C	53943	10	NA	NA
0.0183311	-4.41042	YBR299W	805351	2	MAL32	MALtose
0.00418679	-4.07931	YJR086W	586068	10	STE18	STErile
0.039966	-3.98115	YLR008C	165577	12	PAM18	Presequence translocase-Associated Motor
0.00215829	-3.9472	YLR030W	203290	12	NA	NA
0.0391781	-3.71524	YBR083W	409169	2	TEC1	Transposon Enhancement Control
0.0376153	-3.63387	YOL019W-A	288420	15	NA	NA
0.00418679	-3.45176	YJL203W	53341	10	PRP21	Pre-mRNA Processing
0.00356964	-3.44005	YDR491C	1434500	4	NA	NA
0.0386084	-3.40705	YGR169C	834689	7	PUS6	PseudoUridine Synthase
0.0297186	-3.3967	YPR027C	620425	16	NA	NA
0.0321912	-3.38597	YDL119C	246689	4	HEM25	HEMe synthesis by SLC25 family member
0.022437	-3.37444	YBR073W	383112	2	RDH54	RaD54 Homolog
0.00452319	-3.37228	YDL244W	16204	4	THI13	THIamine metabolism	x
0.0192476	-3.36549	YLR236C	611794	12	NA	NA
0.0398397	-3.33131	YCR002C	117380	3	CDC10	Cell Division Cycle
0.0287479	-3.32894	YDR085C	614288	4	AFR1	Alpha-Factor Receptor regulator
0.0448512	-3.30718	YOR212W	742910	15	STE4	STErile
0.0338173	-3.28299	YLR068W	271008	12	FYV7	Function required for Yeast Viability
0.0123016	-3.25405	YER067C-A	292240	5	NA	NA
0.0218194	-3.25072	YLR026C	195450	12	SED5	Suppressor of Erd2 Deletion
0.022437	-3.21119	YDL094C	289572	4	NA	NA
0.0226342	-3.20357	YOL013W-A	301047	15	NA	NA
0.0371362	-3.17836	YBR056W-A	351255	2	MNC1	MaNganese Chelating protein 1
0.022437	-3.17352	YCR050C	213464	3	NA	NA
0.001321	-3.13027	YNL146C-A	351386	14	NA	NA
0.0277368	-3.07264	YPR121W	778583	16	THI22	THIamine metabolism	x
0.00215829	-3.04023	YDL240W	22823	4	LRG1	Lim-RhoGap homolog
0.0367467	-3.02764	YBL061C	105316	2	SKT5	NA
0.0411762	-3.01831	YGR146C	784223	7	ECL1	Extends Chronological Lifespan
0.0399064	-3.01436	YPL130W	304387	16	SPO19	SPOrulation
0.0436923	-2.98778	YLR002C	154343	12	NOC3	NucleOlar Complex associated
0.047062	-2.98597	YFL047W	40421	6	RGD2	RhoGAP domain
0.0226807	-2.97929	YMR158W	572248	13	MRPS8	Mitochondrial Ribosomal Protein, Small subunit
0.0276599	-2.94694	YGR092W	668189	7	DBF2	DumbBell Former
0.0204751	-2.92704	YGL044C	416146	7	RNA15	poly(A) mRNA metabolism
0.0213245	-2.91292	YDR103W	658350	4	STE5	STErile
0.0148721	-2.88553	YBL016W	192451	2	FUS3	cell FUSion
0.031593	-2.86986	YHR044C	194068	8	DOG1	DeOxyGlucose
0.01864	-2.8592	YCR049C	211871	3	NA	NA
0.01864	-2.8423	YIL028W	302100	9	NA	NA
0.022437	-2.84114	YHR148W	393534	8	IMP3	Interacting with Mpp10p
0.042225	-2.83648	YOR276W	841333	15	CAF20	Cap Associated Factor
0.0272665	-2.83325	YOR201C	720470	15	MRM1	Mitochondrial rRNA Methyltransferase
0.0236026	-2.81287	YPR015C	590283	16	NA	NA
0.0419801	-2.81154	YNL018C	599936	14	NA	NA
0.0489498	-2.80046	YIR021W	397294	9	MRS1	Mitochondrial RNA Splicing
0.0486684	-2.78727	YGL176C	171415	7	NA	NA
0.0302222	-2.773	YNL192W	276502	14	CHS1	CHitin Synthase
0.0330869	-2.7334	YPR168W	878076	16	NUT2	Negative regulation of URS Two
0.01132	-2.72634	YNL166C	322219	14	BNI5	Bud Neck Involved
0.038859	-2.71582	YNL146W	351715	14	NA	NA
0.0292085	-2.70502	YOR315W	904760	15	SFG1	SuperFicial pseudohyphal Growth
0.0267986	-2.70299	YIR023C-A	402383	9	NA	NA
0.0299629	-2.69235	YER168C	521029	5	CCA1	tRNA CCA-pyrophosphorylase
0.022437	-2.69224	YOR203W	722565	15	NA	NA
0.0414672	-2.6909	YDL213C	77289	4	NOP6	NucleOlar Protein
0.0324779	-2.6841	YGR229C	949382	7	SMI1	Suppressor of MAR Inhibitor
0.0447706	-2.68282	YLR390W	903066	12	ECM19	ExtraCellular Mutant
0.0382283	-2.66522	YHR063C	224030	8	PAN5	PANtothenate biosynthesis
0.0312572	-2.66466	YOR324C	923232	15	FRT1	Functionally Related to TCP1
0.0370096	-2.6597	YIL016W	321454	9	SNL1	Suppressor of Nup116-C Lethal
0.0288829	-2.61037	YDR524C-B	1489598	4	NA	NA
0.0161154	-2.60078	YMR232W	736926	13	FUS2	cell FUSion
0.0434625	-2.59085	YMR032W	335298	13	HOF1	Homolog Of cdc Fifteen
0.0436025	-2.58241	YOR344C	977194	15	TYE7	Ty1-mediated Expression
0.0378716	-2.57746	YBR161W	561634	2	CSH1	CSG1/SUR1 Homolog
0.0226807	-2.57093	YDL189W	122216	4	RBS1	RNA-Binding Suppressor of PAS kinase
0.01864	-2.56563	YGR044C	582990	7	RME1	Regulator of MEiosis
0.047062	-2.55229	YNL036W	559814	14	NCE103	NonClassical Export
0.0442295	-2.54941	YBR178W	586071	2	NA	NA
0.0433892	-2.542	YLR133W	408445	12	CKI1	Choline KInase
0.0440213	-2.5377	YNR054C	723356	14	ESF2	Eighteen S rRNA Factor 2
0.0498138	-2.52936	YGR249W	988049	7	MGA1	NA
0.0382972	-2.52878	YPR125W	787961	16	YLH47	Yeast LETM1 Homolog of 47 kD
0.0302222	-2.52771	YPL215W	147416	16	CBP3	Cytochrome B mRNA Processing
0.0493228	-2.52087	YPL187W	193648	16	MF(ALPHA)1	Mating Factor ALPHA
0.022437	-2.50673	YOR249C	798674	15	APC5	Anaphase Promoting Complex
0.042225	-2.49413	YLR389C	899577	12	STE23	STErile
0.020051	-2.48453	YGL029W	440063	7	CGR1	Coiled-coil Growth-Regulated
0.022437	-2.47612	YLR083C	294091	12	EMP70	NA
0.031593	-2.46042	YLR312W-A	759480	12	MRPL15	Mitochondrial Ribosomal Protein, Large subunit
0.0454077	-2.45581	YDL157C	174232	4	NA	NA
0.018689	-2.44772	YBR227C	673572	2	MCX1	Mitochondrial ClpX
0.027712	-2.4456	YOR225W	761392	15	NA	NA
0.0374876	-2.44533	YPL060W	434523	16	MFM1	Mrs2 Function Modulating factor
0.047062	-2.44003	YDR524W-C	1489403	4	NA	NA
0.0367467	-2.43427	YAL059W	36509	1	ECM1	ExtraCellular Mutant
0.0298699	-2.43406	YOL031C	266264	15	SIL1	Suppressor of the Ire1/Lhs1 double mutant
0.0242635	-2.43267	YOL163W	9597	15	NA	NA
0.0204751	-2.42854	YCR064C	228095	3	NA	NA
0.047062	-2.42722	YPL077C	409368	16	NA	NA
0.0204751	-2.42571	YPL038W-A	480182	16	NA	NA
0.0485989	-2.41974	YDL049C	365068	4	KNH1	Kre9(Nine) Homolog
0.0348114	-2.41832	YOL150C	44473	15	NA	NA
0.0226807	-2.41154	YOR021C	372798	15	SFM1	Spout Family Methyltransferase 1
0.00702051	-2.41062	YJR088C	586495	10	EMC2	ER Membrane protein Complex
0.0447706	-2.40231	YDR237W	936615	4	MRPL7	Mitochondrial Ribosomal Protein, Large subunit
0.0319693	-2.39766	YDR279W	1019368	4	RNH202	RNase H
0.0391574	-2.38974	YJL200C	56444	10	ACO2	ACOnitase
0.022437	-2.38819	YPR010C	577585	16	RPA135	RNA Polymerase A
0.0204751	-2.38211	YOR081C	476939	15	TGL5	TriacylGlycerol Lipase
0.0264622	-2.38197	YOL006C	313078	15	TOP1	TOPoisomerase
0.0241551	-2.3761	YBR261C	734832	2	TAE1	Translation Associated Element
0.020051	-2.37607	YPR122W	782045	16	AXL1	AXiaL budding
0.0297186	-2.36491	YGL175C	173285	7	SAE2	Sporulation in the Absence of spo Eleven
0.0302222	-2.35989	YOL151W	43694	15	GRE2	Genes de Respuesta a Estres (stress responsive genes)
0.022437	-2.34665	YLR103C	343989	12	CDC45	Cell Division Cycle
0.0296022	-2.34184	YNL233W	211922	14	BNI4	Bud Neck Involved
0.022437	-2.34141	YLR147C	434158	12	SMD3	NA
0.0449875	-2.33818	YPR143W	818323	16	RRP15	Ribosomal RNA Processing
0.022437	-2.3363	YKL042W	358475	11	SPC42	Spindle Pole Component
0.0447706	-2.32923	YLR368W	857540	12	MDM30	Mitochondrial Distribution and Morphology
0.0213245	-2.3253	YJR097W	612413	10	JJJ3	J-protein (Type III)
0.0183311	-2.3215	YPL001W	554605	16	HAT1	Histone AcetylTransferase
0.0235237	-2.31754	YNR020C	667410	14	ATP23	NA
0.0421564	-2.31419	YHL007C	95118	8	STE20	STErile
0.0423249	-2.31203	YGL063W	383654	7	PUS2	PseudoUridine Synthase
0.0475783	-2.31067	YNL274C	121118	14	GOR1	GlyOxylate Reductase
0.0256169	-2.30999	YJL197W	63805	10	UBP12	UBiquitin-specific Protease
0.042225	-2.29987	YDR543C	1524634	4	NA	NA
0.0243764	-2.29986	YGL088W	345836	7	NA	NA
0.0385039	-2.29724	YNL225C	222724	14	CNM67	Chaotic Nuclear Migration
0.0243764	-2.29688	YMR184W	628189	13	ADD37	Alpha1-proteinase inhibitor-Degradation Deficient
0.0238823	-2.28981	YHR152W	401434	8	SPO12	SPOrulation
0.001321	-2.28913	YBR292C	784702	2	NA	NA
0.0232921	-2.28491	YGR014W	516943	7	MSB2	Multicopy Suppression of a Budding defect
0.0204751	-2.27353	YDR484W	1422763	4	VPS52	Vacuolar Protein Sorting
0.0286401	-2.27331	YNL261W	155100	14	ORC5	Origin Recognition Complex
0.0344305	-2.26931	YDR379W	1230167	4	RGA2	Rho GTPase Activating Protein
0.0362221	-2.26461	YJL129C	173599	10	TRK1	TRansport of potassium (K)
0.026133	-2.26399	YML038C	202775	13	YMD8	NA
0.01864	-2.2635	YML061C	148953	13	PIF1	Petite Integration Frequency
0.032828	-2.25728	YGR285C	1061852	7	ZUO1	ZUOtin
0.00575176	-2.24968	YER075C	308413	5	PTP3	Protein Tyrosine Phosphatase
0.0243995	-2.24281	YHL017W	70276	8	NA	NA
0.0281506	-2.23921	YLR196W	543968	12	PWP1	Periodic tryptophan (W) Protein
0.026133	-2.23802	YER147C-A	465203	5	NA	NA
0.0204751	-2.23125	YGR265W	1021648	7	NA	NA
0.0213245	-2.22331	YBR244W	707528	2	GPX2	Glutathione PeroXidase
0.0204751	-2.22275	YDR235W	933504	4	PRP42	Pre-mRNA Processing
0.0367467	-2.21844	YBL096C	43174	2	NA	NA
0.0183311	-2.21126	YPR119W	771653	16	CLB2	CycLin B
0.0444041	-2.20461	YPL068C	424215	16	NA	NA
0.0204751	-2.19821	YDL160C-A	169366	4	MHF2	Mph1-associated Histone-Fold protein
0.01864	-2.19365	YDL098C	284581	4	SNU23	Small NUclear ribonucleoprotein associated
0.029018	-2.19342	YDR418W	1301616	4	RPL12B	Ribosomal Protein of the Large subunit
0.0348114	-2.19312	YER078W-A	318646	5	NA	NA
0.0204751	-2.18732	YOR326W	925721	15	MYO2	MYOsin
0.0302222	-2.18706	YCR003W	118620	3	MRPL32	Mitochondrial Ribosomal Protein, Large subunit
0.0323267	-2.18522	YDR346C	1167214	4	SVF1	SurVival Factor
0.0427633	-2.17435	YMR285C	840144	13	NGL2	NA
0.0243764	-2.17435	YLR064W	265456	12	PER33	Pore and ER protein, 33 kDa
0.0342254	-2.17089	YKL099C	255720	11	UTP11	U Three Protein
0.0204751	-2.16632	YNL213C	246460	14	RRG9	Required for Respiratory Growth
0.048062	-2.16584	YOL128C	78352	15	YGK3	Yeast homolog of Glycogen synthase Kinase
0.0403502	-2.16549	YGR118W	726974	7	RPS23A	Ribosomal Protein of the Small subunit
0.0461273	-2.15905	YPL249C-A	75699	16	RPL36B	Ribosomal Protein of the Large subunit
0.0475783	-2.15473	YKL011C	420155	11	CCE1	Cruciform Cutting Endonuclease
0.0242635	-2.15229	YAR014C	166742	1	BUD14	BUD site selection
0.0303312	-2.1505	YGL149W	225572	7	NA	NA
0.01864	-2.14965	YKR083C	596421	11	DAD2	Duo1 And Dam1 interacting
0.0218194	-2.13902	YMR033W	337788	13	ARP9	Actin-Related Protein
0.0451522	-2.1331	YGR194C	886073	7	XKS1	XyluloKinaSe
0.022437	-2.132	YPL126W	310210	16	NAN1	Net1 Associated Nuclear protein
0.022437	-2.13171	YMR287C	842436	13	DSS1	Deletion of SUV3 Supressor
0.0401595	-2.12819	YGR120C	730033	7	COG2	Conserved Oligomeric Golgi complex
0.0407793	-2.12425	YPL106C	350194	16	SSE1	Stress Seventy subfamily E
0.0491629	-2.12159	YOL152W	40748	15	FRE7	Ferric REductase
0.030713	-2.12082	YDL031W	394217	4	DBP10	Dead Box Protein
0.0213245	-2.11502	YOR172W	654210	15	YRM1	Yeast Reveromycin resistance Modulator
0.0364997	-2.11117	YLR223C	582233	12	IFH1	Interacts with Fork Head
0.00702051	-2.10207	YBR162C	563203	2	TOS1	Target Of Sbf
0.0447504	-2.09393	YKR042W	519527	11	UTH1	yoUTH
0.0472397	-2.09259	YKL096C-B	259073	11	NA	NA
0.0360166	-2.08994	YIL045W	271161	9	PIG2	Protein Interacting with Gsy2p
0.022437	-2.08767	YLR358C	843487	12	NA	NA
0.0213245	-2.08315	YKR100C	638901	11	SKG1	Suppressor of lethality of Kex2 Gas1 double null mutant
0.0166717	-2.07948	YPL007C	542082	16	TFC8	Transcription Factor C
0.0357536	-2.07735	YKR024C	485144	11	DBP7	Dead Box Protein
0.0348114	-2.07232	YDR301W	1063352	4	CFT1	Cleavage Factor Two
0.00619985	-2.07224	YNL010W	613635	14	PYP1	PolYol Phosphatase
0.0483292	-2.06815	YGL179C	163409	7	TOS3	Target Of Sbf
0.0218194	-2.05435	YNL185C	292193	14	MRPL19	Mitochondrial Ribosomal Protein, Large subunit
0.0201589	-2.05153	YKL074C	294610	11	MUD2	Mutant U1 Die
0.0308972	-2.05057	YNL167C	319416	14	SKO1	Suppressor of Kinase Overexpression
0.022437	-2.0481	YOR079C	473475	15	ATX2	AnTioXidant
0.0392592	-2.04388	YOR022C	373710	15	DDL1	DDHD Domain-containing Lipase
0.0316522	-2.04329	YIL010W	334882	9	DOT5	Disruptor Of Telomeric silencing
0.0226533	-2.04226	YNL056W	517249	14	OCA2	Oxidant-induced Cell cycle Arrest
0.0469991	-2.0415	YMR239C	748262	13	RNT1	RNase Three
0.0319838	-2.03938	YKL108W	234426	11	SLD2	Synthetically Lethal with Dpb11-1
0.0286401	-2.03932	YOR008C-A	342857	15	NA	NA
0.0326448	-2.03633	YGL137W	249869	7	SEC27	SECretory
0.0292016	-2.03275	YDR123C	698554	4	INO2	INOsitol requiring
0.024055	-2.03174	YIL098C	179772	9	FMC1	Formation of Mitochondrial Complexes
0.042225	-2.03149	YOR233W	775846	15	KIN4	KINase
0.0476044	-2.03043	YDR326C	1120609	4	YSP2	Yeast Suicide Protein
0.0396319	-2.02877	YPR009W	576552	16	SUT2	Sterol UpTake
0.037948	-2.02729	YPL264C	43283	16	NA	NA
0.0440335	-2.02688	YNR024W	672409	14	MPP6	M-Phase Phosphoprotein 6 homolog
0.0471847	-2.0252	YHL048W	6401	8	COS8	COnserved Sequence
0.0340973	-2.02263	YIR001C	356143	9	SGN1	Slower Growth on Non-fermentable carbon sources
0.0209598	-2.01923	YNL002C	626174	14	RLP7	Ribosomal-Like Protein
0.0380287	-2.01652	YJL133W	160619	10	MRS3	Mitochondrial RNA Splicing
0.0414672	-2.01186	YBL002W	236492	2	HTB2	Histone h Two B
0.0318513	-2.01061	YML031W	214189	13	NDC1	Nuclear Division Cycle
0.0264622	-2.00962	YER073W	304030	5	ALD5	ALdehyde Dehydrogenase
0.0326798	-2.00608	YNR009W	642690	14	NRM1	Negative Regulator of MBF targets
0.0242635	-2.00195	YOL033W	263475	15	MSE1	Mitochondrial aminoacyl-tRNA Synthetase, Glutamate (E)
0.0204751	-2.00058	YGR137W	762888	7	NA	NA
0.0243764	-1.99584	YKL097C	258503	11	NA	NA
0.0367619	-1.9938	YBR080C	398614	2	SEC18	SECretory
0.0364997	-1.99239	YLR452C	1039270	12	SST2	SuperSensiTive
0.01864	-1.99218	YMR077C	421484	13	VPS20	Vacuolar Protein Sorting
0.0439889	-1.98976	YMR164C	587274	13	MSS11	Multicopy Suppressor of STA genes
0.0336887	-1.98714	YML077W	111865	13	BET5	Blocked Early in Transport
0.0367467	-1.98697	YJR101W	618234	10	RSM26	Ribosomal Small subunit of Mitochondria
0.0433566	-1.97759	YHR070W	234881	8	TRM5	tRNA Methyltransferase
0.0375007	-1.97574	YDL145C	194571	4	COP1	COat Protein
0.0201589	-1.97454	YLL035W	68580	12	GRC3	NA
0.022437	-1.97421	YDL164C	164987	4	CDC9	Cell Division Cycle
0.0243764	-1.97334	YOR158W	632164	15	PET123	PETite colonies
0.0231741	-1.9733	YDL225W	52445	4	SHS1	Seventh Homolog of Septin
0.024055	-1.97168	YJR102C	619157	10	VPS25	Vacuolar Protein Sorting
0.0415343	-1.97146	YBR254C	723736	2	TRS20	TRapp Subunit
0.022437	-1.97002	YNR040W	699690	14	MRX15	Mitochondrial oRganization of gene eXpression (MIOREX)
0.0414672	-1.9686	YDR240C	943674	4	SNU56	Small NUclear ribonucleoprotein associated
0.0218194	-1.9679	YGR074W	635712	7	SMD1	snRNA Sm binding site protein D1
0.0302222	-1.95928	YLR238W	614755	12	FAR10	Factor ARrest
0.0302222	-1.95807	YDR316W	1093763	4	OMS1	OXA1 Multicopy Suppressor
0.0367467	-1.95517	YOL113W	104326	15	SKM1	STE20/PAK homologous Kinase related to Morphogenesis
0.0129575	-1.95395	YER176W	541690	5	ECM32	ExtraCellular Mutant
0.0273622	-1.95116	YIL035C	287790	9	CKA1	Casein Kinase Alpha subunit
0.0348114	-1.94998	YBL085W	63876	2	BOI1	Bem1 (One) Interacting protein
0.0302222	-1.94869	YGR179C	853675	7	OKP1	Outer Kinetochore Protein
0.0396426	-1.94828	YDR488C	1429188	4	PAC11	Perish in the Absence of CIN8
0.0367619	-1.94764	YKR023W	483419	11	RQT4	Ribosome-Quality control Trigger factor
0.022437	-1.94652	YMR225C	720960	13	MRPL44	Mitochondrial Ribosomal Protein, Large subunit
0.0292085	-1.94388	YML007C-A	253162	13	MIN4	mitochondrial MINi protein of 4 kDa
0.0204751	-1.94211	YKL017C	405190	11	HCS1	dna HeliCaSe
0.014388	-1.93847	YMR130W	532119	13	DPI35	Delta-Psi dependent mitochondrial Import protein of 35 kDa
0.0325109	-1.93815	YLR386W	893628	12	VAC14	VACuole morphology and inheritance mutant
0.0474695	-1.93757	YPR073C	691933	16	LTP1	Low molecular weight protein Tyrosine Phosphatase
0.0292085	-1.93452	YNL169C	316169	14	PSD1	PhosphatidylSerine Decarboxylase
0.0235237	-1.93165	YJR055W	538772	10	HIT1	HIgh Temperature growth
0.0140125	-1.93094	YOR037W	401555	15	CYC2	CYtochrome C
0.0334921	-1.92864	YGL045W	414102	7	RIM8	Regulator of IME2
0.0433566	-1.92764	YDR077W	600793	4	SED1	Suppression of Exponential Defect
0.0362801	-1.92478	YER005W	160550	5	YND1	Yeast Nucleoside Diphosphatase
0.0360166	-1.92335	YIL104C	169982	9	SHQ1	Small nucleolar RNAs of the box H/ACA family Quantitative accumulation
0.0338173	-1.92327	YBR023C	284428	2	CHS3	CHitin Synthase-related
0.03468	-1.91787	YDR194C	845952	4	MSS116	Mitochondrial Splicing System
0.0360166	-1.91733	YHR085W	276764	8	IPI1	Involved in Processing ITS2
0.0204751	-1.91506	YMR247C	763351	13	RKR1	RING domain mutant Killed by Rtf1 deletion
0.0388814	-1.91293	YGL183C	156543	7	MND1	Meiotic Nuclear Divisions
0.0402184	-1.91244	YLL036C	66745	12	PRP19	Pre-RNA Processing
0.0272665	-1.90892	YLR139C	421542	12	SLS1	Synthetic Lethal with SSM4
0.0414672	-1.90701	YKR070W	573574	11	NA	NA
0.0320609	-1.90574	YML059C	153219	13	NTE1	Neuropathy Target Esterase
0.0302222	-1.90486	YIL118W	139752	9	RHO3	Ras HOmolog
0.0241551	-1.90261	YBR282W	768240	2	MRPL27	Mitochondrial Ribosomal Protein, Large subunit
0.0247255	-1.9025	YBR219C	662499	2	NA	NA
0.0202523	-1.90144	YKL115C	222893	11	NA	NA
0.0493777	-1.89512	YLR209C	560797	12	PNP1	purine nucleoside phosphorylase
0.0293419	-1.89184	YJL096W	246490	10	MRPL49	Mitochondrial Ribosomal Protein, Large subunit
0.0298946	-1.89041	YCL045C	44623	3	EMC1	ER Membrane protein Complex
0.0161154	-1.88987	YKL138C	185286	11	MRPL31	Mitochondrial Ribosomal Protein, Large subunit
0.0469736	-1.88916	YGR035C	557072	7	NA	NA
0.0235237	-1.88642	YJR142W	697141	10	NA	NA
0.0419092	-1.8821	YKL031W	382072	11	NA	NA
0.0204751	-1.88019	YDL150W	183343	4	RPC53	RNA Polymerase C
0.0463256	-1.87973	YER070W	298950	5	RNR1	RiboNucleotide Reductase
0.0218194	-1.87871	YDL226C	51115	4	GCS1	Growth Cold Sensitive
0.0362801	-1.87783	YLR051C	246324	12	FCF2	Faf1p Copurifying Factor
0.0286401	-1.87779	YPR043W	654166	16	RPL43A	Ribosomal Protein of the Large subunit
0.0370096	-1.87513	YBR024W	289445	2	SCO2	Suppressor of Cytochrome Oxidase deficiency
0.0467829	-1.87476	YKR095W-A	625864	11	PCC1	Polarized growth Chromatin-associated Controller
0.0230481	-1.87375	YGR148C	787312	7	RPL24B	Ribosomal Protein of the Large subunit
0.0204751	-1.87037	YBR262C	735720	2	MIC12	MItochondrial contact site and Cristae organizing system
0.0437661	-1.86858	YOL140W	58759	15	ARG8	ARGinine requiring	x
0.024055	-1.86784	YGR238C	966039	7	KEL2	KELch repeat
0.0251556	-1.85961	YMR192W	647118	13	GYL1	GYp Like
0.0442921	-1.85889	YAL035W	76427	1	FUN12	Function Unknown Now
0.0226807	-1.85413	YAL019W	114919	1	FUN30	Function Unknown Now
0.0440335	-1.85167	YMR265C	796540	13	NA	NA
0.038603	-1.84958	YKL033W-A	374505	11	NA	NA
0.0344305	-1.8489	YMR066W	401541	13	SOV1	Synthesis Of Var
0.0488867	-1.84229	YKR041W	518198	11	NA	NA
0.0370096	-1.84113	YGL026C	446412	7	TRP5	TRyPtophan	x
0.0348114	-1.83946	YOL114C	103317	15	PTH4	peptidyl tRNA hydrolase 4
0.0440213	-1.8391	YER186C	561705	5	NA	NA
0.0204751	-1.83538	YDR312W	1087581	4	SSF2	Suppressor of ste4 (Four)
0.0129575	-1.83387	YGL192W	142246	7	IME4	Inducer of MEiosis
0.0364997	-1.8324	YPL128C	306533	16	TBF1	TTAGGG repeat-Binding Factor
0.022437	-1.82979	YPR056W	671126	16	TFB4	Transcription Factor B subunit 4
0.0348114	-1.82821	YOR286W	850280	15	RDL2	RhoDanese-Like protein
0.020848	-1.82744	YKL209C	42423	11	STE6	STErile
0.031593	-1.82522	YLR376C	872826	12	PSY3	Platinum SensitivitY
0.029726	-1.82398	YNL147W	350940	14	LSM7	Like SM
0.0302222	-1.81914	YPR105C	736984	16	COG4	Conserved Oligomeric Golgi complex
0.031593	-1.81892	YMR281W	832339	13	GPI12	GlycosylPhosphatidylInositol anchor biosynthesis
0.0474695	-1.81629	YJL174W	95092	10	KRE9	Killer toxin REsistant
0.0361386	-1.81297	YDL105W	272389	4	NSE4	Non-SMC Element
0.0297855	-1.80923	YDL202W	98475	4	MRPL11	Mitochondrial Ribosomal Protein, Large subunit
0.0377635	-1.80832	YKL106W	237536	11	AAT1	Aspartate AminoTransferase	x
0.0204751	-1.80797	YLR325C	781143	12	RPL38	Ribosomal Protein of the Large subunit
0.0447504	-1.80774	YLR181C	516678	12	VTA1	VpsTwenty Associated
0.0360166	-1.80632	YLR222C-A	582006	12	NA	NA
0.0166717	-1.80529	YNL227C	220659	14	JJJ1	J-protein (Type III)
0.0367467	-1.80407	YBR061C	364787	2	TRM7	Transfer RNA Methyltransferase
0.021917	-1.79433	YKR027W	491364	11	BCH2	Bud7 and Chs6 Homolog
0.022437	-1.79208	YLR408C	933885	12	BLS1	BLoS1-homolog
0.01864	-1.79169	YNL254C	168043	14	RTC4	Restriction of Telomere Capping
0.0468156	-1.78972	YEL053C	53901	5	MAK10	MAintenance of Killer
0.0243764	-1.78945	YDR157W	769931	4	NA	NA
0.0498389	-1.78738	YGR189C	876669	7	CRH1	Congo Red Hypersensitive
0.0425289	-1.78464	YDR083W	612073	4	RRP8	Ribosomal RNA Processing
0.0319838	-1.78351	YMR039C	348644	13	SUB1	SUppressor of TFIIB mutations
0.0467801	-1.78171	YGL253W	23935	7	HXK2	HeXoKinase
0.0204751	-1.78133	YDR389W	1252537	4	SAC7	Suppressor of ACtin
0.0308833	-1.78012	YJL006C	423138	10	CTK2	Carboxy-Terminal domain Kinase
0.0416109	-1.77698	YCR088W	265068	3	ABP1	Actin Binding Protein
0.0469736	-1.7768	YPR079W	698869	16	MRL1	Mannose 6-phosphate Receptor Like
0.0132946	-1.77276	YDR416W	1298432	4	SYF1	SYnthetic lethal with cdcForty
0.0166717	-1.7725	YJL156C	126853	10	SSY5	Sulfonylurea Sensitive on YPD
0.0489869	-1.77247	YDR156W	769525	4	RPA14	RNA Polymerase A
0.0393057	-1.77083	YFR032C	222090	6	RRT5	Regulator of rDNA Transcription
0.0462741	-1.7707	YGL064C	381523	7	MRH4	Mitochondrial RNA Helicase
0.0427933	-1.77032	YFR037C	227513	6	RSC8	Remodel the Structure of Chromatin
0.0368978	-1.76661	YGR277C	1045644	7	CAB4	Coenzyme A Biosynthesis
0.0325109	-1.76568	YFL010C	115108	6	WWM1	WW domain containing protein interacting with Metacaspase
0.0359889	-1.76458	YCR027C	167370	3	RHB1	RHeB homolog
0.0226807	-1.76373	YGR173W	843854	7	RBG2	RiBosome interacting Gtpase
0.024095	-1.76362	YBR247C	713004	2	ENP1	Essential Nuclear Protein
0.0420977	-1.76204	YNL170W	315978	14	NA	NA
0.0204751	-1.76183	YLR032W	204991	12	RAD5	RADiation sensitive
0.047692	-1.75981	YHR107C	326813	8	CDC12	Cell Division Cycle
0.0286401	-1.75899	YGR217W	924696	7	CCH1	Calcium Channel Homolog
0.0226807	-1.75887	YKR075C	579827	11	NA	NA
0.0398086	-1.75806	YLR401C	922442	12	DUS3	DihydroUridine Synthase
0.024055	-1.75746	YNL308C	54122	14	KRI1	KRR1-Interacting protein
0.0232921	-1.75723	YMR295C	858297	13	NA	NA
0.0318795	-1.75319	YDR432W	1328783	4	NPL3	Nuclear Protein Localization
0.0472397	-1.75158	YKL130C	195288	11	SHE2	Swi5p-dependent HO Expression
0.0284679	-1.74816	YMR188C	636291	13	MRPS17	Mitochondrial Ribosomal Protein, Small subunit
0.0453403	-1.74794	YGR076C	637104	7	MRPL25	Mitochondrial Ribosomal Protein, Large subunit
0.0273164	-1.74792	YOR017W	361412	15	PET127	PETite colonies
0.020051	-1.74749	YGR093W	670388	7	DRN1	Debranching enzyme-associated RiboNuclease
0.0204751	-1.7416	YKL012W	418310	11	PRP40	Pre-mRNA Processing
0.0213245	-1.73866	YMR214W	695350	13	SCJ1	S. Cerevisiae DnaJ
0.0436025	-1.73719	YER006C-A	164344	5	NA	NA
0.0123016	-1.73652	YLR315W	764808	12	NKP2	Non-essential Kinetochore Protein
0.0373964	-1.73554	YBR027C	294024	2	NA	NA
0.0225696	-1.73399	YLR363C	852495	12	NMD4	Nonsense-Mediated mRNA Decay
0.0467801	-1.73334	YAL015C	126903	1	NTG1	eNdonuclease Three-like Glycosylase
0.0407793	-1.72435	YPL032C	488887	16	SVL3	Styryl dye Vacuolar Localization
0.0315889	-1.72212	YJR110W	633615	10	YMR1	Yeast Myotubularin Related
0.0376153	-1.72182	YGR202C	903474	7	PCT1	Phosphocholine CytidylylTransferase
0.031778	-1.72168	YGR219W	936035	7	NA	NA
0.022437	-1.7181	YMR131C	533163	13	RRB1	Regulator of Ribosome Biogenesis
0.0255552	-1.71738	YIL086C	200153	9	NA	NA
0.0322217	-1.71666	YPL038W	480535	16	MET31	METhionine requiring	x
0.0204751	-1.71653	YGL129C	267723	7	RSM23	Ribosomal Small subunit of Mitochondria
0.0267986	-1.71634	YPL011C	533642	16	TAF3	TATA binding protein-Associated Factor
0.0303312	-1.71328	YDR197W	851228	4	CBS2	Cytochrome B Synthesis
0.0300145	-1.71292	YKR060W	556518	11	UTP30	U Three Protein
0.0257734	-1.7115	YER034W	221846	5	NA	NA
0.0344305	-1.7107	YOR308C	894624	15	SNU66	Small NUclear ribonucleoprotein associated
0.0292016	-1.70969	YGL210W	93792	7	YPT32	Yeast Protein Two
0.0438184	-1.7089	YPL227C	120163	16	ALG5	Asparagine-Linked Glycosylation
0.025304	-1.70815	YNL155W	342516	14	CUZ1	Cdc48-associated UBL/Zn-finger protein
0.020051	-1.70275	YEL015W	126629	5	EDC3	Enhancer of mRNA DeCapping
0.0149252	-1.7008	YPL213W	150614	16	LEA1	Looks Exceptionally like U2A
0.0253761	-1.70039	YPL204W	164276	16	HRR25	HO and Radiation Repair
0.0297115	-1.69823	YLR169W	500335	12	NA	NA
0.00438211	-1.69685	YMR210W	687516	13	MGL2	MonoacylGlycerol Lipase
0.024095	-1.69118	YDR089W	622112	4	VTC5	Vacuole Transporter Chaperone
0.0286401	-1.69069	YHR018C	140011	8	ARG4	ARGinine requiring	x
0.0166717	-1.6906	YMR193W	650036	13	MRPL24	Mitochondrial Ribosomal Protein, Large subunit
0.0272665	-1.68766	YHR169W	442181	8	DBP8	Dead Box Protein
0.0204751	-1.68751	YBL023C	174920	2	MCM2	MiniChromosome Maintenance
0.0325197	-1.68629	YGR030C	545681	7	POP6	Processing Of Precursor RNAs
0.0242862	-1.6844	YOL107W	112102	15	NA	NA
0.0459807	-1.68154	YCR014C	139185	3	POL4	POLymerase
0.0204751	-1.68134	YCR097W	293835	3	HMRA1	Hidden Mat Right A
0.024055	-1.68074	YGR037C	559731	7	ACB1	Acyl-CoA-Binding
0.0396328	-1.68054	YLR245C	626502	12	CDD1	CytiDine Deaminase
0.0396426	-1.68052	YKR098C	633026	11	UBP11	UBiquitin-specific Protease
0.0360189	-1.68033	YOR115C	538659	15	TRS33	TRapp Subunit
0.0253761	-1.67432	YDR243C	948518	4	PRP28	Pre-mRNA Processing
0.0295103	-1.67032	YOR091W	493433	15	TMA46	Translation Machinery Associated
0.0396426	-1.67026	YOR130C	569929	15	ORT1	ORnithine Transporter
0.0367467	-1.66773	YOR087W	487707	15	YVC1	Yeast Vacuolar Conductance
0.0492333	-1.66683	YPR019W	596750	16	MCM4	MiniChromosome Maintenance
0.0204751	-1.66644	YDL236W	32296	4	PHO13	PHOsphate metabolism
0.0414672	-1.6664	YBR007C	248806	2	DSF2	Deletion Suppressor of mptFive/pufFive mutation
0.0458829	-1.66588	YLR453C	1041799	12	RIF2	Rap1p-Interacting Factor
0.0166717	-1.66526	YKL041W	360143	11	VPS24	Vacuolar Protein Sorting
0.0290712	-1.66504	YDR333C	1133260	4	RQC1	Ribosome Quality Control
0.0459807	-1.66181	YPL205C	163922	16	NA	NA
0.0286401	-1.66065	YGL232W	62075	7	TAN1	Trna AcetylatioN
0.0396426	-1.65964	YDR170C	796193	4	SEC7	SECretory
0.0490082	-1.65881	YPL249C	76669	16	GYP5	Gtpase-activating protein for Ypt Proteins
0.0204751	-1.65684	YGR035W-A	557565	7	NA	NA
0.0417839	-1.65664	YGR020C	526973	7	VMA7	Vacuolar Membrane Atpase
0.0273459	-1.65562	YNL081C	476188	14	SWS2	Sick Without Securin
0.0237805	-1.65482	YDR026C	492556	4	NSI1	NTS1 SIlencing protein 1
0.0214994	-1.65444	YOR025W	378219	15	HST3	Homolog of SIR Two (SIR2)
0.0256169	-1.65369	YOR174W	658747	15	MED4	MEDiator complex
0.021973	-1.65127	YPR144C	819765	16	NOC4	NucleOlar Complex associated
0.0272521	-1.6506	YDL074C	324047	4	BRE1	BREfeldin A sensitivity
0.0342254	-1.64952	YFL028C	79344	6	CAF16	CCR4 Associated Factor
0.036536	-1.64679	YLR132C	407283	12	USB1	U Six Biogenesis
0.0493076	-1.64677	YLR153C	445524	12	ACS2	Acetyl CoA Synthetase
0.0401305	-1.64422	YOR104W	517642	15	PIN2	Psi+ INducibility
0.0235495	-1.6433	YDL175C	144484	4	AIR2	Arginine methyltransferase-Interacting RING finger protein
0.0204751	-1.64172	YGL226W	73340	7	MTC3	Maintenance of Telomere Capping
0.0410923	-1.64053	YPL168W	231217	16	MRX4	Mitochondrial oRganization of gene eXpression (MIOREX)
0.0407793	-1.63808	YDR347W	1169178	4	MRP1	Mitochondrial Ribosomal Protein
0.0325109	-1.6374	YML009C	251304	13	MRPL39	Mitochondrial Ribosomal Protein, Large subunit
0.0392592	-1.63433	YGR056W	601661	7	RSC1	Remodel the Structure of Chromatin
0.0123016	-1.63289	YDR238C	937895	4	SEC26	SECretory
0.0443998	-1.63152	YLR285W	707360	12	NNT1	Nicotinamide N-methylTransferase
0.0296022	-1.63019	YJL148W	140437	10	RPA34	RNA Polymerase A
0.0391574	-1.62978	YKL208W	47157	11	CBT1	Cytochrome B Termination
0.0250709	-1.62635	YMR298W	863819	13	LIP1	Lag1p/Lac1p Interacting Protein
0.0382283	-1.62613	YKL029C	382716	11	MAE1	MAlic Enzyme
0.0352184	-1.62506	YHR028W-A	167352	8	NA	NA
0.0367467	-1.62111	YOR281C	846269	15	PLP2	Phosducin-Like Protein
0.0415939	-1.62097	YLR107W	364116	12	REX3	Rna EXonuclease
0.0398397	-1.62047	YGR240C	970771	7	PFK1	PhosphoFructoKinase
0.037625	-1.61847	YNL038W	557020	14	GPI15	GlycosylPhosphatidylInositol anchor biosynthesis
0.0355048	-1.61641	YIL070C	230272	9	MAM33	Mitochondrial Acidic Matrix protein
0.039874	-1.61475	YMR159C	574476	13	ATG16	AuTophaGy related
0.0288829	-1.61454	YMR044W	355384	13	IOC4	Iswi One Complex		x
0.0148599	-1.61354	YDR086C	616928	4	SSS1	Sec Sixty-one Suppressor
0.0470583	-1.61085	YKL211C	36699	11	TRP3	TRyPtophan	x
0.024055	-1.61083	YKL156W	158613	11	RPS27A	Ribosomal Protein of the Small subunit
0.0316522	-1.60974	YDR334W	1135932	4	SWR1	SWi2/snf2-Related
0.0235237	-1.60896	YJR154W	725784	10	NA	NA
0.0302222	-1.60747	YNL217W	240331	14	PPN2	NA
0.047062	-1.6061	YNL255C	167329	14	GIS2	GIg Suppressor
0.0427534	-1.60433	YCR015C	141217	3	CTO1	Cold TOlerance
0.0262631	-1.60388	YNL032W	574506	14	SIW14	Synthetic Interaction with Whi2
0.0415094	-1.60348	YFL049W	36803	6	SWP82	SWi/snf-associated Protein		x
0.0212019	-1.60305	YMR277W	820256	13	FCP1	tfiiF-associating component of Ctd Phosphatase
0.0322369	-1.60031	YGR165W	829116	7	MRPS35	Mitochondrial Ribosomal Protein, Small subunit
0.0342254	-1.59464	YFL004W	131810	6	VTC2	Vacuolar Transporter Chaperone
0.036214	-1.59267	YNL079C	478566	14	TPM1	TroPoMyosin
0.020051	-1.59122	YLR292C	719789	12	SEC72	SECretory
0.0348078	-1.59068	YNL297C	71673	14	MON2	MONensin sensitivity
0.0213245	-1.59034	YDR495C	1438115	4	VPS3	Vacuolar Protein Sorting
0.0226807	-1.59016	YCL029C	68599	3	BIK1	BIlateral Karyogamy defect
0.0204751	-1.59001	YDR031W	503498	4	MIX14	Mitochondrial Intermembrane space CX(n)C motif protein
0.0226807	-1.58605	YBL031W	161699	2	SHE1	Sensitivity to High Expression
0.0493228	-1.58517	YNL016W	602907	14	PUB1	PolyUridylate Binding
0.0253761	-1.58375	YMR309C	892988	13	NIP1	Nuclear ImPort
0.0402212	-1.58192	YBL046W	132424	2	PSY4	Platinum SensitivitY
0.0496332	-1.58189	YPR024W	610481	16	YME1	Yeast Mitochondrial Escape
0.022437	-1.58164	YKR036C	508702	11	CAF4	CCR4 Associated Factor
0.0417095	-1.58047	YIL123W	128151	9	SIM1	Start Independent of Mitosis
0.0404219	-1.58015	YGR169C-A	836387	7	LSO2	Late-annotated Small Open reading frame
0.0292085	-1.58014	YOL164W	6175	15	BDS1	Bacterially Derived Sulfatase
0.0362221	-1.57993	YER058W	271768	5	PET117	PETite colonies
0.0292602	-1.57975	YOR367W	1026007	15	SCP1	S. cerevisiae CalPonin
0.0319838	-1.57819	YLR357W	841331	12	RSC2	Remodel the Structure of Chromatin
0.0392592	-1.5781	YNL039W	555048	14	BDP1	B Double Prime
0.0360189	-1.57773	YPR018W	594476	16	RLF2	Rap1 protein Localization Factor
0.0414672	-1.57501	YJR052W	532062	10	RAD7	RADiation sensitive
0.0214994	-1.5748	YOR254C	805032	15	SEC63	SECretory
0.0364997	-1.57425	YHR017W	138694	8	YSC83	NA
0.0244007	-1.57343	YBR206W	634601	2	NA	NA
0.0292085	-1.57184	YMR284W	838187	13	YKU70	Yeast KU protein
0.0338173	-1.57156	YPL132W	301716	16	COX11	Cytochrome c OXidase
0.01864	-1.57098	YJL156W-A	126604	10	NA	NA
0.01864	-1.56826	YBR293W	787006	2	VBA2	Vacuolar Basic Amino acid transporter	x
0.0212019	-1.56662	YNL053W	529942	14	MSG5	Multicopy Suppressor of GPA1
0.0349643	-1.56549	YNL024C	587107	14	EFM6	Elongation Factor Methyltransferase
0.01217	-1.56502	YMR306W	881159	13	FKS3	FK506 Sensitivity
0.0272665	-1.56427	YGL076C	364335	7	RPL7A	Ribosomal Protein of the Large subunit
0.0114192	-1.5638	YBL095W	43277	2	MRX3	Mitochondrial oRganization of gene eXpression (MIOREX)
0.0485187	-1.56264	YCR053W	216697	3	THR4	THReonine requiring	x
0.0295423	-1.56167	YIL009C-A	335666	9	EST3	Ever Shorter Telomeres
0.047062	-1.56081	YEL068C	25646	5	NA	NA
0.0348078	-1.55967	YJR109C	629585	10	CPA2	Carbamyl Phosphate synthetase A
0.0204751	-1.5593	YMR283C	835326	13	RIT1	Ribosylation of Initiator tRNA
0.0292085	-1.55867	YLL011W	127523	12	SOF1	Suppressor Of Fibrillarin
0.0243764	-1.55786	YHR178W	459299	8	STB5	Sin Three Binding protein
0.0396426	-1.55514	YOR305W	889022	15	RRG7	Required for Respiratory Growth
0.0483772	-1.55478	YDL030W	397537	4	PRP9	Pre-mRNA Processing
0.0296022	-1.5547	YNL083W	471377	14	SAL1	Suppressor of Aac2 Lethality
0.0344305	-1.55367	YDR176W	814452	4	NGG1	NA
0.0272665	-1.55154	YGR072W	634304	7	UPF3	UP Frameshift
0.0428646	-1.55111	YLR172C	501260	12	DPH5	DiPHthamide
0.0204751	-1.54779	YNR050C	714048	14	LYS9	LYSine requiring	x
0.0338173	-1.54545	YOR048C	418630	15	RAT1	Ribonucleic Acid Trafficking
0.0379134	-1.54544	YNL063W	507758	14	MTQ1	Methyltransferase
0.0402212	-1.54538	YMR294W-A	858209	13	NA	NA
0.0314154	-1.54507	YKL079W	286603	11	SMY1	Suppressor of MYo2-66
0.0396734	-1.54372	YIL009W	339344	9	FAA3	Fatty Acid Activation
0.0377635	-1.54261	YLR221C	578362	12	RSA3	RiboSome Assembly
0.0419092	-1.54223	YLR398C	915156	12	SKI2	SuperKIller
0.0390582	-1.54203	YBR245C	708150	2	ISW1	Imitation SWitch subfamily
0.0214994	-1.5407	YLR114C	374944	12	AVL9	Apl2 Vps1 Lethal
0.0235237	-1.53973	YIL021W	312905	9	RPB3	RNA Polymerase B
0.0359889	-1.53661	YOL142W	55558	15	RRP40	Ribosomal RNA Processing
0.0204751	-1.53643	YJL092W	257423	10	SRS2	Suppressor of Rad Six
0.0418013	-1.53574	YDL156W	174918	4	CMR1	Changed Mutation Rate
0.00575176	-1.53388	YLR412W	948368	12	BER1	Benomyl REsistant 1
0.0474695	-1.53135	YDL192W	116321	4	ARF1	ADP-Ribosylation Factor
0.0456514	-1.53101	YDR131C	716790	4	NA	NA
0.00719057	-1.52957	YBR158W	556549	2	AMN1	Antagonist of Mitotic exit Network
0.0243995	-1.52904	YPR187W	911257	16	RPO26	RNA POlymerase
0.0204751	-1.52838	YLR244C	625168	12	MAP1	Methionine AminoPeptidase	x
0.0375016	-1.52825	YDR402C	1272234	4	DIT2	DITyrosine
0.0364997	-1.52699	YDR407C	1284069	4	TRS120	TRapp Subunit
0.0113925	-1.52689	YPL030W	493543	16	TRM44	TRna Methyltransferase
0.0225696	-1.52614	YCR081W	254371	3	SRB8	Suppressor of RNA polymerase B
0.0292085	-1.52553	YBR264C	737770	2	YPT10	Yeast Protein Two
0.0166717	-1.52464	YMR001C	269019	13	CDC5	Cell Division Cycle
0.0423249	-1.5238	YDR527W	1491094	4	RBA50	RNA polymerase II (B) Associated protein
0.01132	-1.52356	YIL019W	315093	9	FAF1	Forty (40) S Assembly Factor
0.025479	-1.52259	YOR252W	803667	15	TMA16	Translation Machinery Associated
0.0385539	-1.52239	YNL221C	231068	14	POP1	Processing Of Precursor RNAs
0.0496332	-1.52189	YCL055W	27929	3	KAR4	KARyogamy
0.0293206	-1.52188	YGL093W	334886	7	SPC105	Spindle Pole Component
0.0460479	-1.51948	YLR448W	1028854	12	RPL6B	Ribosomal Protein of the Large subunit
0.0272665	-1.51847	YNL124W	392892	14	NAF1	Nuclear Assembly Factor
0.021042	-1.51813	YML105C	57866	13	SEC65	SECretory
0.043292	-1.51794	YNR055C	728426	14	HOL1	HistidinOl
0.0304084	-1.51778	YNR003C	634344	14	RPC34	RNA Polymerase C
0.0421069	-1.51705	YHR004C	111754	8	NEM1	Nuclear Envelope Morphology
0.0204751	-1.51441	YLR268W	680200	12	SEC22	SECretory
0.0385539	-1.51246	YML122C	26038	13	NA	NA
0.0396426	-1.51063	YDL183C	130871	4	MRX19	Mitochondrial oRganization of gene eXpression (MIOREX)
0.0306138	-1.50738	YBL090W	48825	2	MRP21	Mitochondrial Ribosomal Protein
0.0303312	-1.5069	YNR045W	706139	14	PET494	PETite colonies
0.0271878	-1.50563	YGR250C	991176	7	RIE1	Restoration of Impaired growths of ERMES-lacking cells
0.0395329	-1.49902	YLR226W	589354	12	BUR2	Bypass UAS Requirement
0.024055	-1.49835	YEL026W	101943	5	SNU13	Small NUclear ribonucleoprotein associated
0.0204751	-1.49808	YMR121C	509734	13	RPL15B	Ribosomal Protein of the Large subunit
0.0382972	-1.49678	YMR211W	689083	13	DML1	Drosophila melanogaster Misato-Like protein
0.0426051	-1.49641	YDR447C	1354829	4	RPS17B	Ribosomal Protein of the Small subunit
0.0391168	-1.49499	YER050C	253971	5	RSM18	Ribosomal Small subunit of Mitochondria
0.0308972	-1.49421	YER008C	167808	5	SEC3	SECretory
0.0336887	-1.49319	YDL012C	431108	4	NA	NA
0.0391574	-1.49276	YOL108C	111431	15	INO4	INOsitol requiring
0.0235366	-1.49274	YER087W	330576	5	AIM10	Altered Inheritance rate of Mitochondria
0.0302623	-1.49002	YBR163W	565723	2	EXO5	EXOnuclease V
0.0241551	-1.48952	YER092W	342855	5	IES5	Ino Eighty Subunit		x
0.0428934	-1.48785	YJL054W	334265	10	TIM54	Translocase of the Inner Mitochondrial membrane
0.0453267	-1.48747	YBL054W	117589	2	TOD6	Twin Of Dot6p
0.00688502	-1.48508	YGL119W	284442	7	COQ8	COenzyme Q
0.0499198	-1.48338	YLR146C	432823	12	SPE4	SPErmidine auxotroph
0.036536	-1.482	YGL107C	304333	7	RMD9	Required for Meiotic nuclear Division
0.0297186	-1.48128	YNL164C	325265	14	IBD2	Inhibition of Bud Division 2
0.0308386	-1.4796	YBR267W	739841	2	REI1	REquired for Isotropic bud growth
0.0226807	-1.47951	YNL133C	374171	14	FYV6	Function required for Yeast Viability
0.0486684	-1.47941	YKL213C	31960	11	DOA1	Degradation Of Alpha
0.031593	-1.47838	YNL088W	457704	14	TOP2	TOPoisomerase
0.031593	-1.478	YGL178W	167352	7	MPT5	Multicopy suppressor of Pop Two
0.0318513	-1.47601	YLR263W	670340	12	RED1	REDuctional division
0.00215829	-1.47119	YLR059C	259738	12	REX2	Rna EXonuclease
0.0414672	-1.47113	YIL138C	89230	9	TPM2	TroPoMyosin
0.0292085	-1.46993	YJR122W	649776	10	IBA57	Iron-sulfur cluster assembly factor for Biotin synthase and Aconitase-like mitochondrial proteins
0.0264622	-1.46922	YNL110C	417826	14	NOP15	NucleOlar Protein
0.0281506	-1.46854	YDR414C	1295598	4	ERD1	Endoplasmic reticulum Retention Defective
0.0475783	-1.46854	YFL016C	104701	6	MDJ1	Mitochondrial DnaJ
0.0405373	-1.46728	YDR375C	1225166	4	BCS1	ubiquinol-cytochrome c reductase (bc1) Synthesis
0.0408048	-1.46714	YGR245C	979765	7	SDA1	Severe Depolymerization of Actin
0.029018	-1.46669	YDR172W	808324	4	SUP35	SUPpressor
0.0338949	-1.46564	YPL040C	475993	16	ISM1	Isoleucyl tRNA Synthetase of Mitochondria
0.0447504	-1.46544	YLR277C	697156	12	YSH1	Yeast Seventy-three Homolog
0.0302222	-1.46487	YDR038C	527422	4	ENA5	Exitus NAtru (Latin, "exit sodium")
0.043292	-1.46486	YNL128W	382359	14	TEP1	TEnsin-like Phosphatase
0.0281861	-1.46457	YKL095W	262277	11	YJU2	NA
0.0392592	-1.46375	YAL011W	132199	1	SWC3	SWr Complex		x
0.0407825	-1.46368	YBR133C	501804	2	HSL7	Histone Synthetic Lethal
0.0475783	-1.46306	YGR144W	780399	7	THI4	THIamine metabolism	x
0.0218194	-1.46249	YAL024C	101565	1	LTE1	Low Temperature Essential
0.01864	-1.46009	YDR151C	764178	4	CTH1	Cysteine-Three-Histidine
0.0474695	-1.45769	YJL095W	247255	10	BCK1	Bypass of C Kinase
0.0221592	-1.45752	YFR046C	243074	6	CNN1	Co-purified with NNf1p
0.0248473	-1.45726	YDL182W	133437	4	LYS20	LYSine requiring	x
0.0348114	-1.45711	YHL004W	99219	8	MRP4	Mitochondrial Ribosomal Protein
0.0302222	-1.45337	YJR140C	690750	10	HIR3	HIstone Regulation		x
0.0342806	-1.45297	YFR003C	152657	6	YPI1	Yeast Phosphatase Inhibitor
0.0348114	-1.45275	YPR132W	794965	16	RPS23B	Ribosomal Protein of the Small subunit
0.0292085	-1.45209	YFR005C	154527	6	SAD1	SnRNP Assembly Defective
0.0419917	-1.45199	YNL264C	145563	14	PDR17	Pleiotropic Drug Resistance
0.021042	-1.45149	YER078C	316807	5	ICP55	Intermediate Cleaving Peptidase
0.0439139	-1.45119	YDL044C	373967	4	MTF2	Mitochondrial Transcription Factor
0.0475783	-1.45098	YHR002W	108812	8	LEU5	LEUcine biosynthesis	x
0.0204751	-1.45003	YBR223C	668663	2	TDP1	Tyrosyl-DNA Phosphodiesterase
0.0370043	-1.44926	YDR475C	1407464	4	JIP4	Jumonji domain Interacting Protein
0.0324779	-1.44919	YJL046W	352386	10	AIM22	Altered Inheritance rate of Mitochondria
0.0367467	-1.44912	YDL219W	65242	4	DTD1	D-Tyr-tRNA(Tyr) Deacylase
0.0427534	-1.44877	YHR167W	439342	8	THP2	THO2 - HPR1 Phenotype
0.0248473	-1.44851	YOR239W	784857	15	ABP140	Actin Binding Protein
0.0267668	-1.4463	YDR392W	1258696	4	SPT3	SuPpressor of Ty's
0.0302623	-1.44406	YBL018C	185998	2	POP8	Processing Of Precursor RNAs
0.031593	-1.44394	YKL206C	49006	11	ADD66	Alpha1-proteinase inhibitor-Degradation Deficient
0.0306977	-1.44284	YBR152W	546376	2	SPP381	Suppressor of PrP38-1
0.0330256	-1.44176	YDR303C	1068729	4	RSC3	Remodel the Structure of Chromatin		x
0.0257026	-1.44013	YDR046C	548762	4	BAP3	Branched-chain Amino acid Permease	x
0.0342254	-1.43868	YPL207W	159909	16	TYW1	Trna-YW synthesizing protein
0.031593	-1.43619	YGL103W	310967	7	RPL28	Ribosomal Protein of the Large subunit
0.0319838	-1.43613	YKL073W	296430	11	LHS1	Lumenal Hsp Seventy
0.0253761	-1.43606	YBR159W	558685	2	IFA38	NA
0.0297186	-1.43432	YDR159W	771877	4	SAC3	Suppressor of ACtin
0.0359889	-1.43301	YGR104C	697445	7	SRB5	Suppressor of RNA polymerase B
0.0438184	-1.43206	YLL021W	100947	12	SPA2	Spindle Pole Antigen
0.0498138	-1.42913	YGR222W	939923	7	PET54	PETite colonies
0.0324779	-1.4289	YBR098W	441515	2	MMS4	Methyl MethaneSulfonate sensitivity
0.0271878	-1.4289	YMR269W	804456	13	TMA23	Translation Machinery Associated
0.0483292	-1.42681	YEL019C	120498	5	MMS21	Methyl MethaneSulfonate sensitivity
0.0207084	-1.42643	YGR239C	969187	7	PEX21	PEroXin
0.0360166	-1.42619	YML056C	162194	13	IMD4	IMP Dehydrogenase
0.029018	-1.4261	YMR307W	887003	13	GAS1	Glycophospholipid-Anchored Surface protein
0.0348114	-1.42599	YIR018W	384609	9	YAP5	Yeast AP-1
0.0268655	-1.42538	YJR092W	598735	10	BUD4	BUD site selection
0.0370096	-1.42255	YBR155W	549771	2	CNS1	CyclophiliN Seven suppressor
0.0201589	-1.42223	YPL269W	33013	16	KAR9	KARyogamy
0.0396426	-1.42214	YBL021C	181660	2	HAP3	Heme Activator Protein
0.0226807	-1.42178	YLR079W	286820	12	SIC1	Substrate/Subunit Inhibitor of Cyclin-dependent protein kinase
0.0243764	-1.42111	YDR108W	671269	4	TRS85	TRapp Subunit
0.0235237	-1.42025	YGL194C	140368	7	HOS2	Hda One Similar
0.0281506	-1.41922	YBR060C	360652	2	ORC2	Origin Recognition Complex
0.0299435	-1.41747	YMR257C	779629	13	PET111	PETite colonies
0.0292085	-1.41564	YBR042C	320416	2	CST26	Chromosome STability
0.0242635	-1.41469	YKL082C	281025	11	RRP14	Ribosomal RNA Processing
0.0258279	-1.41466	YJL013C	409493	10	MAD3	Mitotic Arrest-Deficient
0.0427933	-1.41261	YML026C	222987	13	RPS18B	Ribosomal Protein of the Small subunit
0.0213245	-1.41225	YBR166C	569842	2	TYR1	TYRosine	x
0.0352347	-1.41151	YAL010C	134184	1	MDM10	Mitochondrial Distribution and Morphology
0.0237164	-1.41121	YLR078C	285736	12	BOS1	Bet One Suppressor
0.0496038	-1.40709	YLR033W	208761	12	RSC58	Remodel the Structure of Chromatin		x
0.0358701	-1.40702	YOR323C	921535	15	PRO2	PROline requiring
0.0296022	-1.40516	YJR089W	587718	10	BIR1	Baculoviral IAP Repeat-containing protein
0.0367619	-1.4043	YLR416C	954491	12	NA	NA
0.0303312	-1.40364	YLR146W-A	433870	12	NA	NA
0.0272665	-1.40288	YLR418C	956914	12	CDC73	Cell Division Cycle
0.0321213	-1.40234	YPL043W	469939	16	NOP4	NucleOlar Protein
0.0312366	-1.40232	YKR079C	586789	11	TRZ1	tRNase Z
0.0359889	-1.40171	YHR122W	353625	8	CIA2	Cytosolic Iron-sulfur protein Assembly
0.0232921	-1.40155	YMR304C-A	878780	13	NA	NA
0.0437236	-1.40073	YJL115W	196287	10	ASF1	Anti-Silencing Function
0.0292085	-1.40015	YAL041W	62840	1	CDC24	Cell Division Cycle
0.0407793	-1.39913	YLR310C	752224	12	CDC25	Cell Division Cycle
0.0359945	-1.39847	YNL076W	483556	14	MKS1	Multicopy Kinase Suppressor
0.0406631	-1.39795	YFR007W	159299	6	YFH7	NA
0.0334921	-1.39776	YBR157C	553543	2	ICS2	Increased Copper Sensitivity
0.0440335	-1.3974	YGL111W	299978	7	NSA1	Nop Seven Associated
0.0359889	-1.39648	YMR212C	690695	13	EFR3	PHO Eighty Five Requiring
0.0380287	-1.39468	YJL209W	38005	10	CBP1	Cytochrome B mRNA Processing
0.0378716	-1.39424	YDL217C	67983	4	TIM22	Translocase of the Inner Mitochondrial membrane
0.0226807	-1.39395	YDR120C	691549	4	TRM1	tRNA Methyltransferase
0.0257107	-1.39368	YBR268W	741299	2	MRPL37	Mitochondrial Ribosomal Protein, Large subunit
0.0427933	-1.39316	YDR295C	1052623	4	HDA2	Histone DeAcetylase		x
0.0341712	-1.39282	YHR073W	242582	8	OSH3	OxySterol binding protein Homolog
0.0318513	-1.39264	YPR175W	888974	16	DPB2	DNA Polymerase B subunit 2
0.0359889	-1.39133	YPL169C	229039	16	MEX67	Messenger RNA EXport factor of 67 kDa
0.0497556	-1.39124	YDL020C	415113	4	RPN4	Regulatory Particle Non-ATPase
0.0235237	-1.39116	YOR008W-B	343929	15	NA	NA
0.0364997	-1.39094	YBR162W-A	565231	2	YSY6	NA
0.0345451	-1.39076	YBR205W	633622	2	KTR3	Kre Two Related
0.0382972	-1.39063	YLR099C	339744	12	ICT1	Increased Copper Tolerance
0.0204751	-1.38867	YDR376W	1226822	4	ARH1	Adrenodoxin Reductase Homolog
0.0392592	-1.38845	YGL023C	450197	7	PIB2	PhosphatidylInositol(3)-phosphate Binding
0.0290552	-1.38751	YMR091C	450058	13	NPL6	Nuclear Protein Localization		x
0.0348078	-1.38633	YJR075W	573981	10	HOC1	Homologous to OCh1
0.0471071	-1.3837	YPL225W	126006	16	NA	NA
0.0129575	-1.38312	YML011C	246895	13	RAD33	RADiation sensitive
0.0359889	-1.38245	YJL062W-A	316723	10	COA3	Cytochrome Oxidase Assembly
0.0420977	-1.38122	YHR068W	232133	8	DYS1	DeoxyhYpusine Synthase
0.0399736	-1.38098	YFR027W	207452	6	ECO1	Establishment of COhesion
0.0204751	-1.38051	YKR090W	608946	11	PXL1	PaXillin-Like protein
0.0436025	-1.37925	YAL047C	54989	1	SPC72	Spindle Pole Component
0.024055	-1.37902	YOR106W	519121	15	VAM3	VAcuolar Morphogenesis
0.0478122	-1.37704	YOL078W	181682	15	AVO1	Adheres VOraciously (to TOR2)
0.0398397	-1.37683	YCR024C	160744	3	SLM5	Synthetic Lethal with Mss4
0.0362526	-1.3763	YDR198C	852533	4	RKM2	Ribosomal protein lysine (K) Methyltransferase
0.0440335	-1.37547	YIR007W	370704	9	EGH1	Cryptococcus neoformans EGCrP2 Homolog
0.0267986	-1.37492	YJR067C	567019	10	YAE1	NA
0.0368978	-1.37389	YLR006C	161755	12	SSK1	Suppressor of Sensor Kinase
0.0497368	-1.37352	YPR166C	876282	16	MRP2	Mitochondrial Ribosomal Protein
0.0272665	-1.37266	YNR023W	670418	14	SNF12	Sucrose NonFermenting
0.0364997	-1.37155	YDR071C	588827	4	PAA1	PolyAmine Acetyltransferase
0.0392279	-1.37144	YPR094W	720637	16	RDS3	Regulator of Drug Sensitivity
0.0297186	-1.36751	YDR489W	1431012	4	SLD5	Synthetic Lethality with Dpb11-1
0.0498138	-1.36461	YKR006C	450423	11	MRPL13	Mitochondrial Ribosomal Protein, Large subunit
0.0396426	-1.3626	YBL074C	86722	2	AAR2	A1-Alpha2 Repression
0.0303459	-1.36206	YLR054C	248717	12	OSW2	Outer Spore Wall
0.0360166	-1.36175	YDL045W-A	372248	4	MRP10	Mitochondrial Ribosomal Protein
0.01864	-1.36127	YDR228C	921926	4	PCF11	Protein 1 of Cleavage and polyadenylation Factor I
0.0423061	-1.36024	YGL110C	301537	7	CUE3	Coupling of Ubiquitin conjugation to ER degradation
0.0204751	-1.35866	YBL017C	186844	2	PEP1	carboxyPEPtidase Y-deficient
0.0241551	-1.35842	YDR480W	1417399	4	DIG2	Down-regulator of Invasive Growth
0.0319838	-1.35813	YPR025C	613377	16	CCL1	NA
0.0441511	-1.35632	YDR292C	1043146	4	SRP101	Signal Recognition Particle
0.0418016	-1.35613	YLR338W	804346	12	OPI9	OverProducer of Inositol
0.049567	-1.35575	YPR152C	832061	16	URN1	U2-U5-U6 snRNP, RES complex, and NTC interacting protein
0.0302222	-1.35487	YPL137C	292817	16	GIP3	Glc7 Interacting Protein
0.0292085	-1.35335	YOL117W	97551	15	RRI2	NA
0.0204751	-1.35243	YBL076C	81043	2	ILS1	IsoLeucine-tRNA Synthetase
0.0204751	-1.35092	YGR142W	772454	7	BTN2	BaTteN disease
0.0308386	-1.35037	YEL057C	45020	5	SDD1	Suppressor of Degenerative Death
0.031593	-1.35004	YGR147C	786054	7	NAT2	N-terminal AcetylTransferase
0.047692	-1.34992	YLR457C	1055812	12	NBP1	Nap1 Binding Protein
0.0226342	-1.34949	YGL200C	122694	7	EMP24	EndoMembrane Protein
0.0308833	-1.34892	YER077C	314534	5	MRX1	Mitochondrial oRganization of gene eXpression (MIOREX)
0.0362801	-1.34882	YDR088C	618497	4	SLU7	Synergistic Lethal with U5 snRNA
0.0403502	-1.34807	YGR199W	897502	7	PMT6	Protein O-MannosylTransferase
0.022437	-1.34638	YJL131C	164278	10	AIM23	Altered Inheritance rate of Mitochondria
0.0374876	-1.34596	YDL107W	268921	4	MSS2	Mitochondrial Splicing
0.020051	-1.34572	YIL148W	68708	9	RPL40A	Ribosomal Protein of the Large subunit
0.031593	-1.3454	YLR382C	882067	12	NAM2	Nuclear Accommodation of Mitochondria
0.0496038	-1.34447	YPR139C	813156	16	LOA1	Lysophosphatidic acid: Oleoyl-CoA Acyltransferase
0.0495545	-1.34343	YDR493W	1436217	4	MZM1	Mitochondrial Zinc Maintenance
0.0292085	-1.34236	YGL058W	393986	7	RAD6	RADiation sensitive
0.0243764	-1.34202	YCL048W	42165	3	SPS22	SPorulation Specific 2 too (2)
0.0302222	-1.34097	YKR056W	549448	11	TRM2	tRNA Methyltransferase
0.028551	-1.3407	YOR171C	652010	15	LCB4	Long-Chain Base
0.0204751	-1.34017	YHR156C	411384	8	LIN1	LINk
0.0183311	-1.33993	YOR211C	738924	15	MGM1	Mitochondrial Genome Maintenance
0.0303312	-1.33885	YDR182W	827582	4	CDC1	Cell Division Cycle
0.0253761	-1.33868	YHL019C	67731	8	APM2	clathrin Adaptor Protein complex Medium chain
0.0340973	-1.33841	YGL163C	193707	7	RAD54	RADiation sensitive
0.0294217	-1.33801	YDR371W	1219413	4	CTS2	ChiTinaSe
0.0409357	-1.33782	YOL115W	101475	15	PAP2	Poly(A) Polymerase
0.0308748	-1.33708	YER151C	469686	5	UBP3	UBiquitin-specific Protease
0.0449875	-1.33431	YJL007C	422698	10	NA	NA
0.0441511	-1.33404	YDL040C	378874	4	NAT1	N-terminal AcetylTransferase
0.036536	-1.33239	YMR111C	492404	13	EUC1	Enriches Ubiquitin on Chromatin
0.0281506	-1.33229	YER016W	188277	5	BIM1	BInding to Microtubules
0.0492771	-1.33161	YBR257W	728885	2	POP4	Processing Of Precursor RNAs
0.001321	-1.33144	YOR188W	685767	15	MSB1	Multicopy Suppression of a Budding defect
0.0348114	-1.33128	YLR239C	616332	12	LIP2	LIPoyl ligase
0.0292636	-1.32795	YDL028C	400997	4	MPS1	MonoPolar Spindle
0.047062	-1.32688	YOR376W-A	1045196	15	NA	NA
0.0303312	-1.32656	YOL112W	106710	15	MSB4	Multicopy Suppression of a Budding defect
0.0201589	-1.32654	YOL029C	269815	15	NA	NA
0.0276386	-1.32616	YER148W	465303	5	SPT15	SuPpressor of Ty insertions
0.01132	-1.32593	YMR179W	619858	13	SPT21	SuPpressor of Ty		x
0.0380287	-1.32406	YBR271W	744852	2	EFM2	Elongation Factor Methyltransferase
0.0302222	-1.32098	YML117W	34243	13	NAB6	Nucleic Acid Binding protein
0.0286401	-1.32008	YDL161W	167714	4	ENT1	Epsin N-Terminal homology
0.0440213	-1.31914	YMR230W	732414	13	RPS10B	Ribosomal Protein of the Small subunit
0.0418016	-1.31847	YMR028W	327482	13	TAP42	Two A phosphatase Associated Protein
0.038373	-1.31847	YIR024C	402841	9	INA22	INner membrane Assembly 22 kDa
0.0342254	-1.31268	YER022W	198812	5	SRB4	Suppressor of RNA polymerase B
0.0204751	-1.31246	YLR119W	385534	12	SRN2	Suppressor of Rna mutations, Number 2
0.0385539	-1.31219	YDR532C	1499396	4	KRE28	NA
0.0166717	-1.3115	YDR016C	478474	4	DAD1	Duo1 And Dam1 interacting
0.0241551	-1.31094	YNL152W	346313	14	INN1	required for INgressioN
0.0367467	-1.30871	YFR048W	246146	6	RMD8	Required for Meiotic nuclear Division
0.0467829	-1.30627	YMR251W	772915	13	GTO3	Glutathione Transferase Omega-like
0.0338173	-1.30527	YHR108W	328303	8	GGA2	Golgi-localized, Gamma-adaptin ear homology, Arf-binding protein
0.0263406	-1.30496	YLR086W	302243	12	SMC4	Structural Maintenance of Chromosomes
0.0288829	-1.3047	YDR055W	563527	4	PST1	Protoplasts-SecreTed
0.045999	-1.30248	YJL208C	40194	10	NUC1	NUClease
0.0292085	-1.30223	YMR291W	852630	13	TDA1	Topoisomerase I Damage Affected
0.0419801	-1.30185	YJL034W	381327	10	KAR2	KARyogamy
0.0298946	-1.30154	YMR255W	778001	13	GFD1	Good For Dbp5p
0.0281506	-1.30105	YMR112C	494100	13	MED11	MEDiator complex
0.0427552	-1.30062	YDL058W	345665	4	USO1	yUSOu - transport in Japanese
0.0281506	-1.29942	YDR014W	474046	4	RAD61	RADiation sensitive
0.0166717	-1.29923	YKR037C	510910	11	SPC34	Spindle Pole Component
0.0226807	-1.29886	YER041W	232461	5	YEN1	NA
0.020494	-1.29815	YML115C	40187	13	VAN1	VANadate resistance protein
0.0396328	-1.29682	YPL175W	218630	16	SPT14	SuPpressor of Ty
0.0427534	-1.29245	YDR277C	1014401	4	MTH1	MSN Three Homolog
0.0348114	-1.29201	YOR047C	416347	15	STD1	Suppressor of Tbp Deletion
0.0429867	-1.29092	YDR034C	509737	4	LYS14	LYSine requiring	x
0.0239339	-1.28991	YGL109W	303513	7	NA	NA
0.022437	-1.28926	YIL159W	41825	9	BNR1	BNi1 Related
0.0441511	-1.28814	YAR002W	152257	1	NUP60	NUclear Pore
0.0201589	-1.28717	YML103C	62582	13	NUP188	NUclear Pore
0.0226807	-1.28711	YDR061W	574164	4	NA	NA
0.0243764	-1.28684	YOL028C	270633	15	YAP7	Yeast AP-1
0.0454077	-1.28553	YKL139W	182958	11	CTK1	Carboxy-Terminal domain Kinase
0.0432464	-1.28347	YNL224C	224796	14	SQS1	SQuelch of Splicing suppression
0.0218194	-1.28263	YMR233W	739185	13	TRI1	NA
0.031593	-1.28067	YDL201W	99561	4	TRM8	Transfer RNA Methyltransferase
0.0348114	-1.27953	YDR485C	1424820	4	VPS72	Vacuolar Protein Sorting		x
0.0272665	-1.2788	YBL052C	119379	2	SAS3	Something About Silencing
0.0235237	-1.27772	YML062C	147505	13	MFT1	Mitochondrial Fusion Targeting
0.0204751	-1.27643	YCR035C	191834	3	RRP43	Ribosomal RNA Processing
0.0440335	-1.27623	YML106W	56773	13	URA5	URAcil requiring
0.0360166	-1.27571	YGL203C	112475	7	KEX1	Killer EXpression defective
0.0290712	-1.27278	YGL095C	328874	7	VPS45	Vacuolar Protein Sorting
0.0183311	-1.27252	YML055W	164790	13	SPC2	Signal Peptidase Complex
0.038211	-1.27025	YLR014C	172268	12	PPR1	Pyrimidine Pathway Regulation
0.01864	-1.26941	YGL004C	490703	7	RPN14	Regulatory Particle Non-ATPase
0.0250709	-1.26928	YGR257C	1006205	7	MTM1	Manganese Trafficking factor for Mitochondrial SOD2
0.0392592	-1.26911	YKR008W	452201	11	RSC4	Remodel the Structure of Chromatin
0.0218194	-1.26909	YNL040W	553380	14	NA	NA
0.0140125	-1.26895	YPL086C	384773	16	ELP3	ELongator Protein
0.0213245	-1.26842	YDR200C	854279	4	VPS64	Vacuolar Protein Sorting
0.0372532	-1.26718	YHR175W-A	453558	8	NA	NA
0.042206	-1.26687	YNL306W	58155	14	MRPS18	Mitochondrial Ribosomal Protein, Small subunit
0.0302222	-1.2663	YPL226W	121767	16	NEW1	Nu+
0.0317634	-1.26563	YML111W	46942	13	BUL2	Binds Ubiquitin Ligase
0.0416085	-1.26343	YIL106W	166415	9	MOB1	Mps One Binder
0.029018	-1.26316	YDR138W	730578	4	HPR1	HyPerRecombination
0.0323267	-1.26266	YKL125W	208247	11	RRN3	Regulation of RNA polymerase I
0.0496529	-1.26088	YNL108C	419014	14	NA	NA
0.0218305	-1.26079	YLR327C	783127	12	TMA10	Translation Machinery Associated
0.0471071	-1.26059	YOR110W	528941	15	TFC7	NA
0.0418013	-1.2596	YOR279C	843698	15	RFM1	Repression Factor of Middle sporulation element			x
0.032828	-1.25926	YLR015W	175227	12	BRE2	BREfeldin A sensitivity
0.0292085	-1.25827	YFL048C	38843	6	EMP47	NA
0.0498138	-1.25807	YBR164C	567875	2	ARL1	ADP-Ribosylation factor-Like
0.048062	-1.25746	YBL004W	227636	2	UTP20	U Three Protein
0.0441511	-1.25658	YMR151W	562506	13	YIM2	NA
0.0489869	-1.25651	YKL114C	223352	11	APN1	APurinic/apyrimidinic eNdonuclease
0.039966	-1.25542	YDR311W	1085065	4	TFB1	Transcription Factor B
0.0440335	-1.25351	YAL037W	74020	1	NA	NA
0.0454787	-1.25287	YHR196W	491931	8	UTP9	U Three Protein
0.0183311	-1.25182	YDR395W	1263324	4	SXM1	Suppressor of mRNA eXport Mutant
0.0460479	-1.25181	YGL043W	417483	7	DST1	DNA Strand Transfer
0.0453514	-1.25151	YJL097W	245591	10	PHS1	PTPLA Homolog involved in Sphingolipid biosynthesis 1
0.0330256	-1.25011	YNL141W	359596	14	AAH1	Adenine AminoHydrolase	x
0.0388814	-1.24963	YPL118W	326628	16	MRP51	Mitochondrial Ribosomal Protein
0.049219	-1.24959	YPL148C	272294	16	PPT2	Phosphopantetheine:Protein Transferase
0.0382972	-1.24944	YKR022C	482171	11	NTR2	NineTeen complex Related protein
0.0309659	-1.24854	YGL244W	41498	7	RTF1	Restores TBP Function
0.0292085	-1.24837	YMR109W	486587	13	MYO5	MYOsin
0.0235237	-1.24719	YOR269W	826385	15	PAC1	Perish in the Absence of Cin8p
0.0468035	-1.24687	YPL029W	495506	16	SUV3	SUppressor of Var1
0.0241551	-1.24623	YPR190C	917077	16	RPC82	RNA Polymerase C
0.0360166	-1.24481	YBL079W	75259	2	NUP170	NUclear Pore
0.0439139	-1.24297	YOR182C	678191	15	RPS30B	Ribosomal Protein of the Small subunit
0.0430013	-1.24198	YML016C	239458	13	PPZ1	Protein Phosphatase Z
0.0166717	-1.24169	YOR292C	865653	15	NA	NA
0.0318513	-1.24144	YGR083C	644860	7	GCD2	General Control Derepressed
0.0371362	-1.24107	YPL216W	143821	16	NA	NA
0.0339125	-1.24054	YPL049C	462481	16	DIG1	Down-regulator of Invasive Growth
0.031593	-1.24021	YNR037C	695052	14	RSM19	Ribosomal Small subunit of Mitochondria
0.0330869	-1.23942	YOR274W	837674	15	MOD5	tRNA MODification
0.0302623	-1.23908	YHR043C	192805	8	DOG2	DeOxyGlucose
0.0391574	-1.23638	YJL106W	221390	10	IME2	Inducer of MEiosis
0.0377635	-1.23536	YJR080C	580432	10	AIM24	Altered Inheritance rate of Mitochondria
0.0367619	-1.23231	YPL237W	100496	16	SUI3	SUppressor of Initiator codon
0.0336887	-1.23018	YFR016C	177042	6	AIP5	Actin Interacting Protein
0.0364997	-1.22827	YMR079W	424989	13	SEC14	SECretory
0.0348114	-1.22791	YLR257W	658826	12	NA	NA
0.0450279	-1.22778	YBR220C	662995	2	NA	NA
0.0427933	-1.22741	YPL250C	74309	16	ATG41	AuTophaGy related
0.0418016	-1.22727	YFL046W	42815	6	FMP32	Found in Mitochondrial Proteome
0.0416109	-1.22661	YNL005C	621313	14	MRP7	Mitochondrial Ribosomal Protein
0.0427534	-1.22628	YMR055C	386101	13	BUB2	Budding Uninhibited by Benzimidazole
0.0398086	-1.2248	YBL059C-A	110125	2	CMC2	Cx9C Motif-Containing protein
0.029018	-1.22389	YLR101C	342566	12	NA	NA
0.0213245	-1.22286	YIL063C	242761	9	YRB2	Yeast Ran Binder
0.0371362	-1.22168	YFL023W	90986	6	BUD27	BUD site selection
0.0401305	-1.22144	YDL063C	338272	4	SYO1	SYnchronized impOrt or SYmpOrtin
0.0398397	-1.22091	YGL089C	344791	7	MF(ALPHA)2	Mating Factor ALPHA
0.0362477	-1.21999	YDR101C	655686	4	ARX1	Associated with Ribosomal eXport complex
0.0204751	-1.21895	YOR194C	711683	15	TOA1	NA
0.0352184	-1.21679	YDR125C	701397	4	ECM18	ExtraCellular Mutant
0.0303312	-1.216	YBL060W	107932	2	YEL1	Yeast EFA6-Like
0.0316522	-1.21527	YBR131W	497163	2	CCZ1	Calcium Caffeine Zinc sensitivity
0.0467829	-1.21449	YBR097W	436951	2	VPS15	Vacuolar Protein Sorting
0.01864	-1.21412	YLR335W	797430	12	NUP2	NUclear Pore
0.0148721	-1.21374	YDR195W	848599	4	REF2	RNA End Formation
0.0286401	-1.2126	YNL257C	160631	14	SIP3	SNF1-Interacting Protein
0.033678	-1.21223	YER003C	157736	5	PMI40	PhosphoMannose Isomerase
0.0213245	-1.21155	YGL060W	390065	7	YBP2	Yap1-Binding Protein
0.0213245	-1.21144	YER174C	538434	5	GRX4	GlutaRedoXin
0.0418013	-1.21134	YNL051W	532659	14	COG5	Conserved Oligomeric Golgi complex
0.0302222	-1.21091	YMR126C	520761	13	DLT1	Defect at Low Temperature
0.0435661	-1.21016	YBR172C	579150	2	SMY2	Suppressor of MYo2-66
0.0161154	-1.20985	YDR332W	1131001	4	IRC3	Increased Recombination Centers
0.0237164	-1.20978	YPL158C	252034	16	AIM44	Altered Inheritance rate of Mitochondria
0.0340787	-1.20636	YBL059W	110594	2	IAI11	Interactor of AIm11
0.0361386	-1.20599	YGL097W	321782	7	SRM1	Suppressor of Receptor Mutations
0.0213245	-1.20566	YDL206W	90176	4	NA	NA
0.0321912	-1.20401	YDR043C	542674	4	NRG1	Negative Regulator of Glucose-repressed genes
0.0303312	-1.20232	YMR010W	285100	13	ANY1	Antagonizes Neo1 Yeast phospholipid flippase
0.0474695	-1.20149	YLL042C	52087	12	ATG10	AuTophaGy related
0.02363	-1.20094	YKL090W	271878	11	CUE2	Coupling of Ubiquitin conjugation to ER degradation
0.0496332	-1.20091	YDR386W	1246084	4	MUS81	MMS and UV Sensitive
0.0385539	-1.20021	YDR184C	830629	4	ATC1	Aip Three Complex
0.022437	-1.19835	YNL059C	512668	14	ARP5	Actin-Related Protein		x
0.0376153	-1.19639	YGL099W	314631	7	LSG1	Large-Subunit Gtpase
0.0204751	-1.19621	YKL164C	141794	11	PIR1	Protein containing Internal Repeats
0.0362801	-1.19493	YDR122W	694700	4	KIN1	KINase
0.0318513	-1.1947	YGR028W	542203	7	MSP1	Mitochondrial Sorting of Proteins
0.0204751	-1.194	YKL068W	310199	11	NUP100	NUclear Pore
0.0409612	-1.19331	YPL111W	339944	16	CAR1	Catabolism of ARginine
0.0427552	-1.19245	YJR120W	647126	10	NA	NA
0.0250709	-1.18739	YJR068W	567643	10	RFC2	Replication Factor C
0.0299507	-1.18635	YPL181W	203421	16	CTI6	Cyc8-Tup1 Interacting protein		x
0.0468035	-1.18621	YGR204C-A	909061	7	NA	NA
0.0485989	-1.18548	YDR318W	1103758	4	MCM21	MiniChromosome Maintenance
0.0294217	-1.1854	YJR152W	719666	10	DAL5	Degradation of Allantoin
0.0376153	-1.18335	YPL272C	26611	16	PBI1	PSTB2 Interacting protein 1
0.0318513	-1.18288	YOR036W	400348	15	PEP12	carboxyPEPtidase Y-deficient
0.0166717	-1.18279	YOR195W	712866	15	SLK19	Synthetic Lethal Kar3p
0.031593	-1.18142	YOL017W	292529	15	ESC8	Establishes Silent Chromatin
0.0475783	-1.18079	YMR023C	319437	13	MSS1	Mitochondrial Splicing System
0.0253761	-1.18051	YJL165C	106894	10	HAL5	HALotolerance
0.0235237	-1.17996	YDR056C	565023	4	EMC10	ER Membrane protein Complex
0.01217	-1.17912	YGR040W	575398	7	KSS1	Kinase Suppressor of Sst2 mutations
0.0363423	-1.17911	YOR205C	725564	15	GEP3	GEnetic interactors of Prohibitins
0.0440335	-1.17877	YDR106W	667004	4	ARP10	Actin-Related Protein
0.0264421	-1.17693	YBR201W	623576	2	DER1	Degradation in the Endoplasmic Reticulum
0.0367467	-1.1764	YIL004C	347946	9	BET1	Blocked Early in Transport
0.0204751	-1.17539	YGR162W	824059	7	TIF4631	Translation Initiation Factor
0.024055	-1.17517	YMR172W	605981	13	HOT1	High-Osmolarity-induced Transcription
0.0166717	-1.17493	YDL216C	68997	4	RRI1	Regulator of Rub1 specific Isopeptidase
0.031593	-1.17376	YLR085C	300673	12	ARP6	Actin-Related Protein		x
0.0442295	-1.17369	YHR077C	252374	8	NMD2	Nonsense-mediated MRNA Decay
0.0392592	-1.17237	YKR011C	461635	11	NA	NA
0.0149252	-1.17229	YLR016C	176802	12	PML1	Pre-mRNA Leakage
0.048062	-1.17155	YCR077C	250238	3	PAT1	Protein Associated with Topoisomerase II
0.0236931	-1.17141	YOR197W	717086	15	MCA1	MetaCAspase
0.0392592	-1.17096	YBR115C	469748	2	LYS2	LYSine requiring	x
0.019527	-1.17094	YMR199W	662644	13	CLN1	CycLiN
0.0250709	-1.17092	YDL043C	375680	4	PRP11	Pre-mRNA Processing
0.0374876	-1.16948	YNL287W	91994	14	SEC21	SECretory
0.0442295	-1.16915	YNL161W	332597	14	CBK1	Cell wall Biosynthesis Kinase
0.0367619	-1.16906	YNR007C	639182	14	ATG3	AuTophaGy related
0.0423752	-1.16851	YPL042C	473040	16	SSN3	Suppressor of SNf1
0.022437	-1.16301	YHR069C	233579	8	RRP4	Ribosomal RNA Processing
0.0204751	-1.16111	YDR286C	1035231	4	MGP12	Mitochondrial Glutaredoxin-like Protein of 12 kDa
0.0259167	-1.16087	YPL112C	337436	16	PEX25	PEroXisome related
0.0292602	-1.1602	YIR039C	430498	9	YPS6	YaPSin
0.0497501	-1.15881	YLR243W	624203	12	GPN3	Gly-Pro-Asn (N) motif
0.0403502	-1.15845	YJR034W	496683	10	PET191	PETite colonies
0.0415939	-1.15833	YGL246C	37617	7	RAI1	Rat1p Interacting Protein
0.0324779	-1.15822	YGR206W	910432	7	MVB12	MultiVesicular Body sorting factor of 12 kilodaltons
0.0210121	-1.15662	YPL053C	457118	16	KTR6	Kre Two Related
0.0237164	-1.1561	YHR030C	168890	8	SLT2	Suppressor of the LyTic phenotype
0.0276386	-1.15581	YJR091C	595061	10	JSN1	Just Say No
0.045999	-1.15467	YDL099W	283419	4	BUG1	Binder of USO1 and GRH1
0.0243764	-1.15437	YBR107C	453793	2	IML3	Increased Minichromosome Loss
0.0274825	-1.15328	YPL009C	535820	16	RQC2	Ribosome Quality control Complex
0.0423061	-1.15288	YDR517W	1477239	4	GRH1	GRasp65 (Golgi reassembly stacking protein of 65kD) Homolog
0.022437	-1.15211	YMR070W	409154	13	MOT3	Modifier of Transcription
0.0292085	-1.15138	YKR099W	635851	11	BAS1	BASal
0.0244007	-1.15064	YDR398W	1267471	4	UTP5	U Three Protein
0.0243764	-1.15046	YNL193W	274368	14	NA	NA
0.0232921	-1.14995	YJL123C	188004	10	MTC1	Maintenance of Telomere Capping
0.0447504	-1.14951	YHR040W	187924	8	BCD1	Box C/D snoRNA accumulation
0.0344305	-1.14929	YJR072C	570967	10	NPA3	Nucleolar Preribosomal Associated
0.01864	-1.14736	YPL258C	53498	16	THI21	THIamine metabolism	x
0.0440213	-1.14513	YBR014C	266725	2	GRX7	GlutaRedoXin
0.038884	-1.14448	YGR224W	942806	7	AZR1	Acetic Acid and AZoles Resistance
0.0483772	-1.14423	YGR013W	514554	7	SNU71	Small NUclear ribonucleoprotein associated
0.0344645	-1.14358	YAR003W	155005	1	SWD1	Set1c, WD40 repeat protein
0.031593	-1.14128	YKR021W	479234	11	ALY1	Arrestin-Like Yeast protein
0.0408048	-1.14112	YBR154C	548362	2	RPB5	RNA Polymerase B
0.0204751	-1.14012	YLR052W	247201	12	IES3	Ino Eighty Subunit		x
0.0338949	-1.13812	YER145C	460526	5	FTR1	Fe TRansporter
0.0204751	-1.13759	YOR083W	479533	15	WHI5	WHIskey
0.0299507	-1.13697	YNL273W	122883	14	TOF1	TOpoisomerase I-interacting Factor
0.0398397	-1.13617	YML130C	11483	13	ERO1	ER Oxidation or Endoplasmic Reticulum Oxidoreductin
0.0204751	-1.13579	YLR105C	347047	12	SEN2	Splicing ENdonuclease
0.0493128	-1.13505	YPL260W	49303	16	CUB1	Cu2+ suppressing and Bleomycin sensitive
0.0204751	-1.13434	YKR020W	478338	11	VPS51	Vacuolar Protein Sorting
0.0194682	-1.13328	YDR304C	1071880	4	CPR5	Cyclosporin-sensitive Proline Rotamase
0.031237	-1.13302	YPR127W	790083	16	NA	NA
0.0386084	-1.13173	YDR091C	626708	4	RLI1	RNase L Inhibitor
0.0325109	-1.12933	YGL135W	254641	7	RPL1B	Ribosomal Protein of the Large subunit
0.0204751	-1.12901	YOR004W	333592	15	UTP23	U Three-associated Protein
0.0423061	-1.1284	YHR076W	251101	8	PTC7	Phosphatase type Two C
0.0344305	-1.12811	YBR055C	344602	2	PRP6	Pre-mRNA Processing
0.0372553	-1.12807	YOL090W	147382	15	MSH2	MutS Homolog
0.031593	-1.12736	YPR066W	681213	16	UBA3	UBiquitin-like protein-Activating enzyme
0.0336887	-1.12681	YCR042C	201174	3	TAF2	TATA binding protein-Associated Factor
0.0381955	-1.12641	YDR080W	604008	4	VPS41	Vacuolar Protein Sorting
0.0235237	-1.12623	YNL099C	438567	14	OCA1	Oxidant-induced Cell-cycle Arrest
0.0334921	-1.12595	YCR052W	214994	3	RSC6	Remodel the Structure of Chromatin
0.0396328	-1.12581	YBR095C	434406	2	RXT2	NA		x
0.0293419	-1.12449	YDR139C	733618	4	RUB1	Related to UBiquitin
0.0364997	-1.12293	YCR017C	144773	3	CWH43	Calcofluor White Hypersensitive
0.0316522	-1.12124	YGL022W	452404	7	STT3	STaurosporine and Temperature sensitive
0.00519966	-1.11986	YPL035C	486564	16	NA	NA
0.0465636	-1.11781	YOR273C	834452	15	TPO4	Transporter of POlyamines
0.0267986	-1.11691	YJR059W	545787	10	PTK2	Putative serine/Threonine protein Kinase
0.0338554	-1.11367	YJR009C	453683	10	TDH2	Triose-phosphate DeHydrogenase
0.0388715	-1.11364	YNL258C	158109	14	DSL1	Dependence on SLy1-20
0.0423061	-1.11337	YDR460W	1383811	4	TFB3	Transcription Factor B subunit 3
0.0489758	-1.11211	YDL093W	289909	4	PMT5	Protein O-MannosylTransferase
0.0496038	-1.1116	YGL127C	270392	7	SOH1	Suppressor Of Hpr1
0.0475783	-1.1111	YBR279W	761257	2	PAF1	RNA Polymerase II Associated Factor
0.0299629	-1.11016	YKL081W	282891	11	TEF4	Translation Elongation Factor
0.0404126	-1.11011	YER018C	191959	5	SPC25	Spindle Pole Component
0.0342254	-1.10981	YER098W	355466	5	UBP9	UBiquitin-specific Protease
0.024055	-1.10713	YDL092W	292781	4	SRP14	Signal Recognition Particle
0.0295002	-1.10651	YMR244W	757250	13	NA	NA
0.0344305	-1.10649	YGR002C	498476	7	SWC4	SWr Complex
0.0359889	-1.1054	YJR060W	548759	10	CBF1	Centromere Binding Factor
0.0338949	-1.10394	YGR220C	936074	7	MRPL9	Mitochondrial Ribosomal Protein, Large subunit
0.031593	-1.10284	YJL130C	165723	10	URA2	URAcil requiring
0.0491629	-1.10238	YGR097W	678695	7	ASK10	Activator of SKn7
0.0318513	-1.09956	YGR134W	757770	7	CAF130	CCR4 Associated Factor
0.0352566	-1.09824	YKR019C	476216	11	IRS4	Increased rDNA Silencing
0.042225	-1.09786	YGL092W	337906	7	NUP145	NUclear Pore
0.0204751	-1.09699	YDR058C	567723	4	TGL2	TriacylGlycerol Lipase
0.0286401	-1.09666	YPR118W	767752	16	MRI1	MethylthioRibose-1-phosphate Isomerase
0.0488867	-1.09335	YDL076C	320668	4	RXT3	NA		x
0.0375016	-1.09309	YDR383C	1239960	4	NKP1	Non-essential Kinetochore Protein
0.0359889	-1.09291	YPL096W	366927	16	PNG1	Peptide N-Glycanase
0.0308748	-1.09277	YMR075W	413982	13	RCO1	NA
0.0497257	-1.09072	YPR055W	667676	16	SEC8	SECretory
0.032415	-1.08733	YJR014W	461829	10	TMA22	Translation Machinery Associated
0.0460479	-1.08701	YDL045C	372688	4	FAD1	FAD synthetase
0.0204751	-1.08653	YMR213W	693381	13	CEF1	CErevisiae homolog of cdc Five
0.024055	-1.08589	YDR137W	728259	4	RGP1	Reduced Growth Phenotype
0.031593	-1.08587	YPL193W	181403	16	RSA1	RiboSome Assembly
0.0272665	-1.08489	YNL062C	508776	14	GCD10	General Control Derepressed
0.0318513	-1.08428	YCR082W	258883	3	AHC2	Ada Histone acetyltransferase complex Component		x
0.038859	-1.08364	YCR102C	304361	3	NA	NA
0.0396426	-1.08316	YMR004W	274017	13	MVP1	Multi-copy suppressor of vps1
0.0302222	-1.08298	YFL010W-A	114990	6	AUA1	Amino acid Uptake Activation	x
0.0306138	-1.08259	YFR022W	196833	6	ROG3	Revertant Of Glycogen synthase kinase mutation
0.0374876	-1.08171	YOR020C	370524	15	HSP10	Heat Shock Protein
0.0485187	-1.08139	YGR215W	922175	7	RSM27	Ribosomal Small subunit of Mitochondria
0.0437236	-1.0801	YEL052W	56571	5	AFG1	ATPase Family Gene
0.0380287	-1.07762	YHR119W	346043	8	SET1	SET domain-containing
0.0234559	-1.07557	YGL233W	59122	7	SEC15	SECretory
0.0318513	-1.07557	YER153C	474041	5	PET122	PETite colonies
0.0290552	-1.07542	YOR121C	551798	15	NA	NA
0.0204751	-1.07496	YKR002W	443232	11	PAP1	Poly(A) Polymerase
0.0319838	-1.07416	YJL003W	432644	10	COX16	Cytochrome c OXidase
0.0375016	-1.07403	YMR149W	560996	13	SWP1	Suppressor of a WbP1 mutation
0.0255478	-1.07399	YLR173W	502421	12	NA	NA
0.0272665	-1.07372	YMR178W	618479	13	FPY1	FAD PYrophosphatase
0.0415939	-1.07193	YDR078C	602198	4	SHU2	Suppressor of HydroxyUrea sensitivity
0.0302623	-1.06922	YDR130C	715747	4	FIN1	Filaments In between Nuclei
0.0204751	-1.0683	YJL051W	339787	10	IRC8	Increased Recombination Centers
0.043871	-1.06493	YOR355W	1005137	15	GDS1	NA
0.0437661	-1.06195	YDR396W	1266295	4	NA	NA
0.0368677	-1.06157	YNL295W	76946	14	MRX6	Mitochondrial oRganization of gene eXpression (MIOREX)
0.0362221	-1.06063	YJL168C	102227	10	SET2	SET domain-containing
0.0312572	-1.0582	YPR163C	868645	16	TIF3	Translation Initiation Factor
0.0367619	-1.05791	YPR008W	573018	16	HAA1	Homolog of Ace1 Activator
0.0255552	-1.0576	YNL148C	349907	14	ALF1	ALpha tubulin Folding
0.0250709	-1.05606	YIL005W	345692	9	EPS1	ER-retained Pma1 Suppressing
0.0367619	-1.05373	YDR331W	1129588	4	GPI8	GlycosylPhosphatidylInositol anchor biosynthesis
0.0218194	-1.05315	YKL166C	134509	11	TPK3	Takashi's Protein Kinase
0.0329452	-1.05243	YNL136W	370368	14	EAF7	Esa1-Associated Factor		x
0.024055	-1.05152	YHR103W	320414	8	SBE22	similar to SBE2
0.0218194	-1.05122	YMR240C	749930	13	CUS1	Cold sensitive U2 snRNA Suppressor
0.0244007	-1.04997	YPR072W	690107	16	NOT5	Negative On TATA
0.0479157	-1.04755	YLR323C	778173	12	CWC24	Complexed With Cef1p
0.0201589	-1.04673	YFL009W	116145	6	CDC4	Cell Division Cycle
0.0447504	-1.04522	YLR293C	720771	12	GSP1	Genetic Suppressor of Prp20-1
0.038603	-1.04475	YDL128W	232652	4	VCX1	VaCuolar H+/Ca2+ eXchanger
0.0201589	-1.04287	YIL027C	303679	9	EMC5	ER Membrane protein Complex
0.0323915	-1.04087	YOR307C	892731	15	SLY41	Suppressor of Loss of Ypt1
0.043292	-1.03984	YHL022C	62961	8	SPO11	SPOrulation
0.0292085	-1.0384	YNL097C	441366	14	PHO23	PHOsphate metabolism		x
0.0272665	-1.03814	YMR273C	811233	13	ZDS1	Zillion Different Screens
0.0491629	-1.03656	YER087C-B	332582	5	SBH1	Sec61 beta homolog 1
0.0403502	-1.03564	YBR015C	267710	2	MNN2	MaNNosyltransferase
0.0290552	-1.03287	YOR176W	662401	15	HEM15	HEMe biosynthesis
0.0482063	-1.03002	YCR020C	154012	3	PET18	PETite colonies
0.0321282	-1.02883	YMR200W	664752	13	ROT1	Reversal Of Tor2 lethality
0.0250709	-1.02771	YNL238W	202428	14	KEX2	Killer EXpression defective
0.0156341	-1.02703	YHR034C	176965	8	PIH1	Protein Interacting with Hsp90
0.0468035	-1.02637	YLR045C	235037	12	STU2	Suppressor of TUbulin
0.0483772	-1.02595	YBR204C	632254	2	LDH1	Lipid Droplet Hydrolase
0.031593	-1.02422	YDR381W	1236558	4	YRA1	Yeast RNA Annealing protein
0.0376153	-1.01807	YER104W	366802	5	RTT105	Regulator of Ty1 Transposition
0.0292085	-1.01799	YIR005W	364889	9	IST3	Increased Sodium Tolerance
0.0440335	-1.01652	YER133W	432495	5	GLC7	GLyCogen
0.0292085	-1.01425	YKL152C	163642	11	GPM1	Glycerate PhosphoMutase
0.0183311	-1.01328	YHR157W	412907	8	REC104	RECombination
0.0238823	-1.01151	YLR381W	879723	12	CTF3	Chromosome Transmission Fidelity
0.00584368	-1.01099	YIL050W	258913	9	PCL7	Pho85 CycLin
0.0231741	-1.01081	YJL044C	358300	10	GYP6	Gtpase-activating protein of Ypt6 Protein
0.029726	-1.00978	YOR076C	469377	15	SKI7	SuperKIller
0.0321912	-1.00966	YJR066W	559416	10	TOR1	Target Of Rapamycin
0.0431872	-1.00918	YDR523C	1485566	4	SPS1	SPorulation Specific
0.0375016	-1.00626	YJL091C	261080	10	GWT1	GPI-anchored Wall protein Transfer
0.0386084	-1.0055	YOR148C	608640	15	SPP2	Suppressor of PrP
0.0204751	-1.00459	YKL067W	314812	11	YNK1	Yeast Nucleoside diphosphate Kinase
0.0396328	-1.00392	YER155C	476345	5	BEM2	Bud EMergence
0.0344305	-1.00256	YMR313C	899379	13	TGL3	TriacylGlycerol Lipase
0.0392592	-1.00249	YDR522C	1483795	4	SPS2	SPorulation Specific
0.038211	-1.00214	YML085C	97941	13	TUB1	TUBulin
0.0414672	-1.00207	YHR111W	333072	8	UBA4	UBiquitin-Activating
0.0343442	-1.00204	YGR047C	586392	7	TFC4	Transcription Factor class C
0.0213245	1.01292	YCL025C	76018	3	AGP1	high-Affinity Glutamine Permease
0.0244007	1.02702	YJL045W	356024	10	SDH9	Succinate DeHydrogenase
0.0431488	1.05718	YEL038W	80462	5	UTR4	Unidentified TRanscript
0.0401311	1.06376	YNL202W	259578	14	SPS19	SPorulation-Specific
0.0459807	1.07847	YDR256C	968133	4	CTA1	CaTalase A
0.0214172	1.14402	YLR438W	1012501	12	CAR2	Catabolism of ARginine
0.0299629	1.15013	YCR025C	163446	3	NA	NA
0.0212019	1.18314	YOL110W	109176	15	SHR5	Suppressor of Hyperactive Ras
0.0348114	1.21445	YJL043W	360130	10	NA	NA
0.0427705	1.26608	YCR010C	132273	3	ADY2	Accumulation of DYads
0.0441511	1.34231	YPR200C	939279	16	ARR2	ARsenicals Resistance
0.0330869	1.42009	YOR384W	1061564	15	FRE5	Ferric REductase
0.0421053	1.44854	YGL242C	44652	7	NA	NA
0.0424412	1.56559	YKL144C	175843	11	RPC25	RNA Polymerase C
0.0327175	4.96001	YPL095C	368071	16	EEB1	Ethyl Ester Biosynthesis
0.000901367	5.03235	YOR377W	1046226	15	ATF1	AcetylTransFerase
0.0338949	5.46588	YBR177C	584807	2	EHT1	Ethanol Hexanoyl Transferase
0.0277078	16.3271	YJL113W	198678	10	NA	NA
0.00369347	18.5408	YDR149C	755555	4	NA	NA
0.00369347	18.7442	YOR383C	1060441	15	FIT3	Facilitator of Iron Transport
0.0268274	20.2739	YDR340W	1150881	4	NA	NA
0.029402	21.06	YHL030W-A	39074	8	NA	NA
