# Supplementary material for: Metabolic, Organoleptic and Transcriptomic Impact of <em>Saccharomyces cerevisiae</em> Genes Involved in the Biosynthesis of Linear and Substituted Esters
Source: Preprints.org preprint supplement (doi:10.20944/preprints202103.0098.v1), 2021-03-02
Supplement: Supplementary file 3 [file Table S1.xlsx]

## Sheet: Feuil1
		FAEE						HAA				AEE				HA				Fermentation traits
strain	gene deleted	C3C2	C4C2	C6C2	C8C2	C10C2	C12C2	C2iC4	C2iC5	C2C6	C2PhC2	2mC3C2	2mC4C2	3mC4C2	PhC2C2	C3OH	iC4OH	2mC4OH	iC5OH	CO2max	lp	t50	t80	t35	rate
Fx10-DA1	ATF1	10.53	82	237.67	209.23	192.95	53.06	8.74	336.69	5.73	74.19	3.71	0.16	0.88	0.24	12.93	37.72	41.62	245.32	84.53	11	46	85	34	0.769
Fx10-DA1	ATF1	15.71	85.57	280.82	292.74	235.16	55.62	8.79	339.82	5.04	78.64	6.19	0.23	0.96	0.26	10.93	37.17	40.1	240.29	84.46	11	46	83	34	0.811
Fx10-DA1	ATF1	10.91	77.31	224.14	182.01	150.54	47.49	7.96	290.88	3.97	76.73	4.1	0.18	0.65	0.25	9.98	38.43	39.82	246.04	84.57	11	46	83	34	0.811
Fx10-DA12	ATF1 ATF2	6.89	148.5	565.43	725.88	437.81	171.72	8.37	580.76	25.91	371.33	7.95	0.41	0.47	2.06	10.29	34.55	36.26	226.5	82.51	8	52	95	37	0.698
Fx10-DA12	ATF1 ATF2	9.57	150.67	617.57	865.64	563.94	215.24	7.85	541.47	23.83	367.43	8.81	0.42	0.93	1.98	7.71	30.97	34.67	202.92	82.48	9	52	96	37	0.682
Fx10-DA12	ATF1 ATF2	11.42	142.95	607.68	793.48	494.78	176.66	9.53	578.78	23.84	383.8	8.42	0.46	2.06	2.1	7.52	31.68	35.14	202.85	82.85	8	53	98	38	0.667
Fx10-DA2	ATF2	9.32	90.74	272.03	231.9	205.72	62.89	58.21	2489.23	100.22	532.36	6.53	0.27	0.79	0.31	10.89	40.6	40.99	266.3	83.94	9	46	82	34	0.833
Fx10-DA2	ATF2	10.56	98.09	293.33	248.3	229.73	73.34	66.84	2703.74	112.23	572.38	5.57	0.36	1	0.28	8.5	37.06	38.17	236.47	84.37	10	46	81	34	0.857
Fx10-DA2	ATF2	11.47	94.86	298.89	275.99	238.22	68.48	64.13	2727.71	110.17	557.2	6.78	0.37	0.88	0.29	10.18	38.36	41.69	252.38	83.9	9	46	82	33	0.833
Fx10-DE1	EEB1	12.88	55.43	54.39	102.39	79.97	21.37	75.19	2668.47	105.5	631.22	6.66	0.42	1.26	0.37	12.23	46.66	51.24	288.34	84.17	11	46	84	33	0.789
Fx10-DE1	EEB1	16.22	61.06	63.42	123.77	89.97	26.44	92.13	3122.77	118.38	705.97	8.53	0.5	1.24	0.39	10.64	51.56	52.38	302.36	83.91	11	46	84	34	0.789
Fx10-DE1	EEB1	15.86	53.43	48.65	65.45	42.22	14.24	75.25	2640.62	97.01	584.4	6.18	0.42	1.24	0.35	0.29	8.12	55.62	286.53	83.89	11	46	84	34	0.789
Fx10-DE1	EEB1 EHT1	13.31	49.42	32.2	36.38	58.63	26.49	87.38	2634.3	89.9	669.71	6.81	0.34	1.1	0.37	10.27	54.03	53.08	285.58	84.15	11	47	85	34	0.789
Fx10-DE12	EEB1 EHT1	NA	44.54	29.94	33.23	51.93	19.78	76.29	2358.86	79.46	675.4	5.33	0.25	1.11	0.38	10.73	53.63	57.79	314.69	84.19	12	46	84	33	0.789
Fx10-DE12	EEB1 EHT1	14.56	53.51	34.64	37.05	61.73	21.66	81.24	2718.74	108.9	624.77	6.03	0.36	1.11	0.38	11.34	49.24	52.79	291.66	84.35	12	46	83	34	0.811
Fx10-DE12	EEB1 EHT1	15.43	81.61	92.67	144.94	103.87	49.99	117.27	4406.84	242.42	5448.7	11.95	0.4	2.37	2.77	8.37	42.97	46.61	241.13	82.05	8	53	99	38	0.652
Fx10-DE12	EEB1 EHT1	6.74	84.07	93.47	135.81	92.41	53.35	104.01	4560.97	254.46	5057.23	9.9	0.59	2.02	2.74	11.29	47.72	50.52	280.49	98.63	7	45	75	34	1
Fx10-DE12	EEB1 EHT1	17.27	82.68	114.88	147.07	96.36	53.92	92.58	3861.72	223.57	4775.41	10.91	0.67	3	2.72	8.51	46.66	49.02	259.66	81.83	8	53	98	38	0.667
Fx10-DE2	EHT1	10.68	86.08	218.51	129.25	106.19	53.62	64.61	2445.95	87.98	567.85	4.81	0.22	0.92	0.27	11.47	40.72	43.51	253.4	84.51	11	45	81	33	0.833
Fx10-DE2	EHT1	11.32	92.23	249.89	165.68	119.65	50.24	67.68	2550.13	93.56	567.36	6.91	0.28	0.72	0.26	10.84	39.55	41.19	249.72	84.7	10	46	82	34	0.833
Fx10-DE2	EHT1	8.7	87.93	233.6	140.23	96.17	42.86	63.31	2471.7	90.62	561.64	6.66	0.3	0.47	0.29	12.15	43.09	41.84	262.1	84.45	10	46	81	34	0.857
Fx10	WT	13.35	94.61	259.73	195.96	167.73	66.02	65.63	2602.66	100.16	510.63	6.38	0.26	1.37	0.24	11.53	37.16	38.01	233.83	85.25	11	45	82	33	0.811
Fx10	WT	9.37	77.27	209.53	151.34	130.43	50.85	50.53	2011.98	79.74	535.01	4.96	0.24	1.13	0.25	10.54	37.36	38.47	237.44	84.52	11	45	83	33	0.789
Fx10	WT	9.53	101.53	287.88	202.42	168.98	64.75	73.97	2860.79	112.31	579.86	6.54	0.35	1.33	0.26	9.01	36.44	36.9	227.37	84.42	11	46	82	33	0.833
Fx10	WT	15.96	201.52	844.86	858.23	519.4	201.24	109.19	3435.16	185.75	3872.75	14.13	0.57	2.24	3.27	9.04	31.22	37.17	226.72	80.33	7	51	100	37	0.61
Fx10	WT	18.21	214.02	884.55	886.04	541.3	209.66	121.07	3870.29	202.21	3907.87	15	0.63	2.37	3.28	10.31	31.7	37.97	231.82	80.78	7	51	100	37	0.63
Fx10	WT	12.27	130.99	631.36	556.29	357.61	166.72	88.35	2464.03	156.03	3782.47	13.76	0.53	2.26	2.65	5.82	30.28	36.16	218.12	79.64	5	47	91	34	0.5
