# Supplementary material for: Metabolic, Organoleptic and Transcriptomic Impact of <em>Saccharomyces cerevisiae</em> Genes Involved in the Biosynthesis of Linear and Substituted Esters
Source: Preprints.org preprint supplement (doi:10.20944/preprints202103.0098.v1), 2021-03-02
Supplement: Supplementary file 4 [file Table S2.xlsx]

## Sheet: Feuil1
must	strain	gene	experiment	FAEE						HAA						AEE				HEE		Vac				HA				Aac			Hac
				C3C2	C4C2	C6C2	C8C2	C10C2	C12C2	C2C3	C2iC4	C2iC5	C2C6	C2C8	C2PhC2	2mC3C2	2mC4C2	3mC4C2	PhC2C2	3hC4C2	2h4mC5C2	C3	C4	C6	C8	C3OH	iC4OH	2mC4OH	iC5OH	2mC3	2mC4	3mC4	2h4mC5	3hC4
Merlot	Fx10	wt	1	75.875	255.995	1232.455	1401.91	882.1	180.47	15.37	65.99	1554.985	10.96	0.225	175.12	9.95	0.97	1.87	1.935	501.10431509	58.135	2571.101726	2045.025809	1316.065165	322.40160805	27.52761718	74.76686884	99.31761564	371.9815196	2345.941027	367.180832	656.51886315	1133.3	902.9
Merlot	Fx10	wt	1	82.34	260.875	1113.51	1288.87	766.21	154.57	24.39	59.945	1132.915	5.99	0.155	116.53	11.335	1.13	2.385	1.89	485.1399546	41.485	2931.610007	2790.7090635	6763.516992	7643.8091105	31.86239657	80.54960216	111.0688279	409.8589996	4010.873551	870.7714209	1842.517542	1145.2	920.5
Merlot	Fx10	wt	1	75.58	267.345	1110.45	1229.34	664.22	145	21.82	67.105	1216.09	5.2	0.15	131.88	9.475	0.93	2.06	2.17	601.14526242	41.335	3359.489488	3724.9333965	9364.9834	7872.808135	37.33566514	101.4454092	122.844165	372.4811183	4163.326344	1074.875674	2116.0341875	1125.5	935.8
Tempranillo	Fx10	wt	1	95.58	270.725	1147.91	1391.415	880.265	218.8	28.31	81.12	2599.88	25.985	0.255	247.535	9.98	0.8	0	1.985	555.391092795	56.04	2139.068071	1871.9615295	5193.0958695	4225.7093635	37.15272912	89.46165186	95.30720889	354.7520863	2480.219087	490.8356782	896.15934975	1207	757.1
Tempranillo	Fx10	wt	1	95.45	262.325	1086.06	1282.59	734.22	157.615	30.085	78.795	2656.24	27.805	0.245	221.995	10.145	0.89	1.49	1.565	482.239998045	32.555	2998.2311055	2806.6439135	7864.614201	9303.795379	35.67706286	86.19622534	92.70889263	336.7513629	3468.27467	684.90497685	1229.883136	1225.3	741.9
Tempranillo	Fx10	wt	1	81.92	339.92	1511.525	1711.72	831.54	272.2	49.68	96.29	3588.675	60.27	0.44	426.91	6.175	0.55	0	1.145	583.189750055	42.46	4451.0414875	3806.3479145	9235.4871415	10093.411805	37.78024466	86.28945885	99.15447562	309.9955166	2682.03879	560.17394375	934.24727875	1247.5	775.3
Merlot	Fx10	ATF1. ATF2. EEB1. EHT1	1	95.745	136.385	155.44	272.795	210.71	69.02	ND	18.635	410.855	1.945	NA	55.61	11.04	1.25	2.44	2.58	37.903714065	36.845	1944.5128795	1496.0272215	904.73389645	394.69117385	32.45996344	87.9240865	125.337194	432.1339924	2681.437812	677.3881422	1371.94163	1648.4	1470.5
Merlot	Fx10	ATF1. ATF2. EEB1. EHT1	1	93.225	152.2	154.695	274.435	236.185	67.265	ND	20.965	428.94	18.255	NA	54.355	10.885	1.29	2.84	2.055	41.38753809	37.475	3735.4878975	2738.5733505	1596.930325	1524.9369245	25.41168679	79.40346457	110.9857097	382.0907355	3443.8937265	850.83966355	1767.5891005	1630.8	1485.4
Merlot	Fx10	ATF1. ATF2. EEB1. EHT1	1	88.16	120.405	124.65	219.36	281.83	105.535	ND	19.42	384.475	2.13	0.145	63.345	8.025	0.82	1.6	1.945	47.464500985	29.615	3902.795695	2664.3518705	1941.873098	2583.8233035	44.92202464	100.4673539	139.3329496	442.3138859	3316.36541	932.30489075	1768.9577135	1685.2	1509.2
Tempranillo	Fx10	ATF1. ATF2. EEB1. EHT1	1	122.815	176.79	143.4	283.575	272.335	112.285	ND	13.805	443.935	3.02	0.155	45.39	10.92	1.145	2.11	2.37	42.983501565	33.26	2260.6771085	1714.462177	583.0138872	235.2878966	29.74883232	61.55804227	90.83815333	303.6107223	2207.2286155	509.56381715	887.1800352	1536	1521.6
Tempranillo	Fx10	ATF1. ATF2. EEB1. EHT1	1	131.58	147.2	128.395	225.145	213.45	86.775	ND	15.46	445.355	2.325	0.16	40.295	12.905	1.295	2.24	2.065	42.477765885	41.84	4115.0972055	3446.1893925	2071.434454	1813.3750365	30.18977548	62.30911674	94.06773325	306.2491329	4383.1339435	1096.2512025	1773.2648215	1540.8	1525.2
Tempranillo	Fx10	ATF1. ATF2. EEB1. EHT1	1	89.77	209.33	108.645	200.11	270.75	133.195	ND	11.85	304.75	2.275	0.11	39.73	7.925	0.755	1.79	1.625	53.730007405	28.55	4825.6099265	4225.440564	1428.8671415	1507.972396	42.89113299	114.7647934	137.2054828	442.2716806	2944.5027095	697.949197	1153.103596	1510.1	1536.1
Merlot	Fx10	wt	2	75.64	282.30	1119.71	1187.01	600.09	135.10	21.82	68.77	1187.56	5.25	0.25	138.83	22.47	1.4	2.88	3.89	394.48497	54.34785	8255.365	4256.376	22440.602	51528.03	11.78	34.68	31.73	187.25	12095.236	15444.77	6666.572	1200.90	844.90
Merlot	Fx10	wt	2	75.52	281.36	1101.19	1271.67	728.35	154.90	22.56	65.44	1244.62	5.15	0.18	124.93	24.61	1.57	3.2	3.74	345.48497	60.34785	8055.365	4626.376	25440.602	53528.03	9.04	31.22	37.17	226.72	10095.236	16123.77	6120.572	1129.10	761.40
Tempranillo	Fx10	wt	2	69.12	244.64	1492.85	792.36	731.43	225.63	53.60	94.39	2050.60	44.60	0.35	312.91	27.96	1.38	1.56	1.63	602.14917	44.5588	11195.668	8125.283	35896.119	87128.79	12.37	32.12	35.15	245.13	10203.693	14128.74	1915.987	1272.10	928.40
Tempranillo	Fx10	wt	2	93.60	247.50	1474.34	801.35	765.05	232.29	54.72	95.49	2097.02	44.92	0.48	318.93	28.21	1.38	1.57	1.68	520.14917	42.5588	12195.668	7425.283	37086.119	86769.79	13.21	35.24	34.12	226.15	12203.693	13077.74	2310.987	1165.00	803.15
Merlot	Fx10 DY	yju3	2	125.99	287.32	771.71	906.19	592.08	157.43	22.23	67.65	1295.79	5.09	0.24	146.73	12.27	0.55	1.52	3.94	371.64874	31.62068	12275.454	5564.792	13436.481	30248.28	9.01	36.44	36.90	227.37	13141.835	34726.17	8193.006	756.20	912.45
Merlot	Fx10 DY	yju3	2	125.39	289.54	765.19	909.48	599.39	151.21	23.56	68.76	1209.59	5.12	0.31	157.08	11.36	0.67	1.56	3.84	423.64874	33.62068	10275.454	5164.792	10436.481	30248.28	10.31	31.70	37.97	231.82	14248.835	39726.17	8256.006	689.35	784.15
Tempranillo	Fx10 DY	yju3	2	85.48	293.08	985.30	683.28	754.76	216.77	60.46	125.19	2376.56	34.10	0.39	319.73	13.32	0.46	0.49	2.34	512.77953	18.67015	12046.422	8286.398	30275.206	71452.59	12.26	32.46	36.15	233.13	12896.056	17338.53	3005.213	668.35	910.90
Tempranillo	Fx10 DY	yju3	2	97.55	293.63	974.20	652.51	702.64	213.43	60.37	124.07	2368.08	33.55	0.41	308.92	15.42	0.48	0.56	2.35	497.77953	22.67015	11896.422	7856.398	29275.206	72701.59	13.15	33.42	35.15	234.12	12569.056	16982.53	2629.213	702.90	854.64
Merlot	Fx10 DM	mgl2	2	124.45	275.44	928.62	1120.97	577.95	156.03	21.58	71.75	1378.11	5.36	0.38	155.61	14.14	0.77	1.84	4.22	537.56892	36.71856	11569.637	4365.383	15303.648	45901.93	10.54	37.36	38.47	237.44	12112.939	34892.52	8129.116	787.30	980.00
Merlot	Fx10 DM	mgl2	2	105.13	272.49	934.78	1108.18	597.11	170.28	20.96	65.19	1367.77	5.34	0.21	165.17	12.13	0.72	1.74	3.69	587.56892	38.71856	12008.637	4635.383	12303.648	45901.93	11.53	37.16	38.01	233.83	11812.939	37328.52	8256.116	806.90	806.90
Tempranillo	Fx10 DM	mgl2	2	91.35	221.94	1382.69	688.54	632.13	211.52	48.76	91.06	2214.32	31.71	0.28	306.99	11.87	0.52	0.9	2.11	810.54922	22.96785	13458.106	7100.425	30721.486	83428.91	14.13	31.15	33.15	239.15	9212.474	17573.11	3142.247	797.10	984.70
Tempranillo	Fx10 DM	mgl2	2	94.80	220.26	1387.58	674.89	625.38	198.34	52.34	89.97	2077.50	31.29	0.23	303.15	12.69	0.53	0.92	2.12	777.54922	24.96785	13172.106	7508.425	25721.486	84852.91	13.46	38.13	39.15	240.36	9952.474	18025.11	2667.247	906.90	893.45
Merlot	Fx10 DMY	mgl2. yju3	2	124.32	265.96	542.69	713.01	550.27	140.56	22.56	65.32	1210.23	6.25	0.33	138.56	8.23	0.7	1.55	3.41	458.65987	32.16965	12035.236	4929.178	11128.550	34525.59	11.53	37.16	38.01	233.83	14131.024	31238.18	8025.24	685.20	911.50
Merlot	Fx10 DMY	mgl2. yju3	2	125.36	268.73	631.30	721.67	565.23	138.78	21.30	66.21	1189.65	5.45	0.35	154.89	7.96	0.71	1.665	3.25	379.65987	30.16965	11975.236	4729.178	10578.550	36025.59	10.26	36.13	39.13	234.56	13842.024	36458.18	7825.24	645.90	856.30
Tempranillo	Fx10 DMY	mgl2. yju3	2	91.20	212.40	796.59	578.50	630.20	210.80	45.80	90.60	2236.40	32.50	0.43	301.50	7.25	0.41	0.64	1.94	589.89120	20.15792	12856.258	8251.569	25058.252	75489.24	16.74	38.30	36.24	220.43	13741.511	17658.46	2589.618	701.50	978.40
Tempranillo	Fx10 DMY	mgl2. yju3	2	89.40	218.40	786.50	629.30	623.40	204.96	51.90	85.30	2158.90	33.50	0.36	308.40	8.06	0.45	0.7	2.03	537.89120	18.15792	12308.258	7836.569	16058.252	74521.24	10.24	31.24	32.15	231.26	14189.511	18125.46	2130.618	662.60	812.80
Merlot	Fx10 DME12	mgl2. eeb1. eht1	2	123.71	59.36	96.66	76.29	94.07	41.44	21.82	68.77	1207.56	5.05	0.26	138.83	17.82	0.88	2.06	1.98	26.20403	32.54585	12539.825	5012.358	7628.183	17131.96	15.65	34.30	34.76	210.95	11743.853	35330.83	8654.782	792.60	1345.90
Merlot	Fx10 DME12	mgl2. eeb1. eht1	2	117.88	60.10	96.91	75.58	95.24	42.70	19.45	65.44	1244.62	5.23	0.29	124.93	16.13	0.98	1.56	2.36	29.20403	35.54585	10523.825	4585.358	8818.183	19123.96	15.82	30.28	36.16	218.12	12450.853	32410.83	8477.782	812.70	1512.10
Tempranillo	Fx10 DME12	mgl2. eeb1. eht1	2	113.31	126.91	86.65	117.88	215.95	118.35	52.30	100.50	2102.40	42.43	0.38	307.18	20.34	0.6	0.93	2.04	48.21860	24.69451	14259.872	8345.157	7893.659	24569.66	11.24	33.26	37.24	236.48	11066.296	14563.66	2896.931	907.50	1429.00
Tempranillo	Fx10 DME12	mgl2. eeb1. eht1	2	111.72	126.50	87.44	123.21	257.91	119.40	55.10	96.56	2089.80	46.43	0.34	318.65	20.97	0.57	0.97	2.03	50.21860	22.69451	13943.872	7619.157	7056.659	22375.66	13.46	35.12	33.13	234.13	11126.296	13631.66	3038.931	860.10	1289.80
