# Supplementary material for: Metabolic, Organoleptic and Transcriptomic Impact of <em>Saccharomyces cerevisiae</em> Genes Involved in the Biosynthesis of Linear and Substituted Esters
Source: Preprints.org preprint supplement (doi:10.20944/preprints202103.0098.v1), 2021-03-02
Supplement: Supplementary file 5 [file Table S3.xlsx]

## Sheet: Feuil1
Familly	Compound	Pvalue strain	Pvalue must	Pvalue interaction	% variance strain	% variance must	% variance inter	% variance residual	Levene test pvalue	Shapiro test pvalue
FAEE	C3C2	0.506	0.029	0.63	3.1	44.5	1.6	50.8	0.5	0.3
	C4C2	<0.0001	0.061	0.81	85.8	5.2	0.1	8.9	0.61	0.48
	C6C2	<0.0001	0.583	0.44	96.4	0.1	0.3	3.2	0.41	0.06
	C8C2	<0.0001	0.357	0.256	96.3	0.3	0.5	2.8	0.34	0.28
	C10C2	<0.0001	0.528	0.67	95.7	0.2	0.1	4	0.45	0.98
	C12C2	<0.0001	0.069	0.39	74.9	8.4	1.6	15.2	0.31	0.53
HAA	C2C3	<0.0001	0.068	0.068	77.8	5.8	5.8	10.5	0.42	0.02
	C2iC4	<0.0001	0.025	0.003	92.7	1.6	3.9	1.7	0.49	0.17
	C2iC5	<0.0001	0.001	0.001	70.4	12.5	12.7	4.5	0.49	0.06
	C2C6	0.005	0.031	0.024	39.4	18.4	20.8	21.4	0.45	0.01
	C2C8	0.001	0.033	0.287	62.9	15.4	3	18.6	0.72	0.16
	C2PhC2	<0.0001	0.055	0.039	64.3	9.4	11.4	14.9	0.36	0.02
AEE	2mC3C2	0.077	0.76	0.404	31.6	0.8	6	61.6	0.83	0.2
	2mC4C2	0.006	0.323	0.572	59.6	4.7	1.5	34.1	0.75	0.23
	3mC4C2	0.023	0.293	0.752	55.2	8	0.7	36.1	0.48	0.66
	PhC2C2	0.004	0.186	0.652	60.9	7.9	0.8	30.3	0.74	0.61
HEE	2h4mC5C2	0.147	0.745	0.76	23.9	1	0.9	74.1	0.83	0.44
	3hC4C2	<0.0001	0.757	0.885	98.1	0	0	1.8	0.44	0.59
VAc	C3	0.832	0.54	0.83	0.6	4.8	0.6	94.1	0.8	0.59
	C4	0.86	0.493	0.467	0.4	5.7	6.4	87.6	0.88	0.44
	C6	0.003	0.586	0.542	65.9	1.3	1.6	31.3	0.27	0.32
	C8	0.007	0.469	0.396	58.3	2.6	3.6	35.5	0.66	0.11
HA	C3OH	0.22	0.52	0.522	16.6	4.2	4.2	75	0.61	0.62
	iC4OH	0.72	0.707	0.589	1.6	1.8	3.7	93	0.67	0.22
	2mC40H	0.017	0.124	0.805	45.1	14.7	0.3	39.9	0.65	0.34
	iC5OH	0.023	0.062	0.657	38.1	22.5	1	38.4	0.73	0.2
Aac	2mC3	0.245	0.591	0.545	15.3	3	3.9	77.8	0.72	0.83
	2mC4	0.05	0.454	0.722	37.8	4.4	1	56.9	0.57	0.99
	3mC4	0.021	0.133	0.961	43.1	14.7	0	42.2	0.67	0.97
Hac	3hC4	<0.0001	0.291	<0.0001	87.7	0.2	11.2	1	0.77	0.82
	2h4mC5	<0.0001	<0.0001	<0.0001	98.5	0.3	1.1	0.1	0.74	0.75
