# Supplementary material for: Metabolic, Organoleptic and Transcriptomic Impact of <em>Saccharomyces cerevisiae</em> Genes Involved in the Biosynthesis of Linear and Substituted Esters
Source: Preprints.org preprint supplement (doi:10.20944/preprints202103.0098.v1), 2021-03-02
Supplement: Supplementary file 6 [file Table S4.xlsx]

## Sheet: Feuil1
Test	Sample 1	Sample 2e	Difference observed
T0
test 1	M1 Fx10-ΔAE + FAEE + HAA +R/S-3OHC4C2 + R-2OHMeC5C2	M1 Fx10 + C3C2 + AEE + S-2OH4MeC5C2	ns
test 2	T1 Fx10-ΔAE + FAEE + HAA +R/S-3OHC4C2 + R-2OHMeC5C2	T1 Fx10 + C3C2 + AEE + S-2OH4MeC5C2	ns
After 6 months
test 1	M1 Fx10-ΔAE	M1 Fx10	ns
	+ FAEE + HAA +R/S-3OHC4C2 + R-2OHMeC5C2	+ C3C2 + AEE + S-2OH4MeC5C2
test 2	T1 Fx10-ΔAE	T1 Fx10	ns
	+ FAEE + HAA +R/S-3OHC4C2 + R-2OHMeC5C2	+ C3C2 + AEE + S-2OH4MeC5C2
