# Supplementary material for: Metabolic, Organoleptic and Transcriptomic Impact of <em>Saccharomyces cerevisiae</em> Genes Involved in the Biosynthesis of Linear and Substituted Esters
Source: Preprints.org preprint supplement (doi:10.20944/preprints202103.0098.v1), 2021-03-02
Supplement: Supplementary file 8 [file Table S6.xlsx]

## Sheet: Feuil1
primer name	targeted gene	sequnece	Tm	Comment
P1045	ATF1	CACCCGGATAATTAAGAAGTGG	55.9	ATF1 deletion
P1046	ATF1	GAGAAGTCCGAAAAATGCGT	55.3
P1057	ATF2	GAACAGGCTTTAGCAAATTTTAAG	55.9	ATF2 deletion
P1058	ATF2	TGCGAGGTAAGACTATTGTC	55.3
P1051	EEB1	AGAAGATCATGTTTGGTGTGAATA	55.9	EEB1 deletion
P1052	EEB1	AGAAGATCATGTTTGGTGTGAATA	55.9
P1055	EHT1	CTTGTTGTCAATCAAATTCTTCC	55.3	EHT1 deletion
P1056	EHT1	TATCCTGATTGAATGTGTCCCC	55.3
P560bis	kanMX4	CGGCGCAGGAACACTG	56.9	kanMX4 insertion control
P1047	ATF1	GGTCGCGATGTATATAGG	55.3	Upstream 600 ATF1 for insertion control
P1050	ATF2	CAGTGGTACTTACTTACCCA	55.3	Upstream 600 ATF2 for insertion control
P1053	EEB1	GATGTTGGTGGGTTCTGGA	56	Upstream 600 EEB1 for insertion control
P1056	EHT1	CACGTGAAATTCTAAGGTCG	55.3	Upstream 600 EHT1 for insertion control
PINS	MGL2	GCGTTAAAGAATCGTAACT	54	Upstream 600 MGL2 for insertion control
P1365	YJU3	AAGAGGATGATGAGGAACTTG	55.9	Upstream 600 YJU3 for insertion control
P1063	ATF1	TACTATTCACGGCCACATCC	57.3	Inside ATF1 for deletion control
P1064	ATF1	TGCTTTTTATTTCTTAAAGCTTCCG	56.4
P1065	ATF2	TTTCATAAAGGTGATTTCTCATCTTG	56.9	Inside ATF2 for deletion control
P1066	ATF2	TCTCTTAACTCTTCATCGTTTGG	57.1
P1067	EEB1	AAACAGCTTGCTTTTCACAGGTT	57.1	Inside EEB1 for deletion control
P1068	EEB1	TGGTTGGACCACCAATCATG	57.3
P1069	EHT1	AGAAATTTCCTGTATTCTACGGCA	57.6	Inside EHT1 for deletion control
P1070	EHT1	AGGAGAAGATCCCAAGGATTG	57.9
P1270	MGL2	AATTCCCCtTAAGATCAGGA	53.2	MGL2 deletion
P1271	MGL2	TTGTCTTCATTGCCGAAATG	53.2
p1320	MGL2	GCGTCTAAAGAATTGTTACCT		Inside MGL2 for deletion control
p1321	MGL2	CAAGTCAGGTTTTAAGCGACTG
p1363	YJU3	TGAAATGAGCCAGAGAGCTG	57.3	YJU3 deletion
p1364	YJU3	AATCGATAACAAACGCAACAG	54
p1365	YJU3	AAGAGGATGATGAGGAACTTG	55.9	Inside YJU3 for deletion control
