# Supplementary material for: Metabolic, Organoleptic and Transcriptomic Impact of <em>Saccharomyces cerevisiae</em> Genes Involved in the Biosynthesis of Linear and Substituted Esters
Source: Preprints.org preprint supplement (doi:10.20944/preprints202103.0098.v1), 2021-03-02
Supplement: Supplementary file 9 [file Table S7.xlsx]

## Sheet: Feuil1
Compounds			Qualitative ions	Quantitative ions
ASA and VA
2-methylpropanoic acid (iC4)			m/z 73	m/z 88
2-methylbutanoic acid (2mC4)			m/z 87/73	m/z 74
3-methylbutanoic acid (iC5)			m/z 87	m/z 60
propanoic acid (C3)			m/z 73	m/z 74
butanoic acid (C4)			m/z 60	m/z 73
hexanoic acid (C6)			m/z 87/73	m/z 60
octanoic acid (C8)			mz 73/69/101	m/z 60
EASA and HA	Derivative methyl esters
(2R/S)-hydroxy-4-methylpentanoic acid (2h3mC5)	methyl (2R/S)-hydroxy-4-methylpentanoate		m/z 45/74/87	m/z 103
(3R/S)-hydroxy-butanoic acid (3hC4)	methyl (3R/S)-hydroxy-butanoate		m/z 73/55/43	m/z 90
(2R/S)-hydroxy-4 methylbutanoic acid (2h3mC4)	methyl (2R/S)-hydroxy-4 methylbutanoate		m/z 69/90	m/z 87
2-hydroxy-2methylpropanoicacid (Internal standard)	methyl 2-hydroxy-2methylpropanoate		m/z 43/103	m/z 59
